# Supplementary material for: Correction: The composition of the founding population of Iceland: A new perspective from 3D analyses of basicranial shape
Source: PLoS One. 2021 Mar 25;16(3):e0249393. doi: 10.1371/journal.pone.0249393 (PMC7993850; doi:10.1371/journal.pone.0249393)
Supplement: S2 File — This file includes supplementary data. (XLSX) [file pone.0249393.s001.xlsx]

## Sheet: All Individuals
Id	sex	pop	Symm1	Symm2	Symm3	Symm4	Symm5	Symm6	Symm7	Symm8	Symm9	Symm10	Symm11	Symm12	Symm13	Symm14	Symm15	Symm16	Symm17	Symm18	Symm19	Symm20	Symm21	Symm22	Symm23	Symm24	Symm25	Symm26	Symm27	Symm28	Symm29	Symm30	Symm31	Symm32	Symm33	Symm34	Symm35	Symm36	Symm37	Symm38	Symm39	Symm40	Symm41	Symm42	Symm43	Symm44	Symm45	Symm46	Symm47
fIhsm21	f	Iceland	0.180512	0.113837	-0.134443	-0.180512	0.113837	-0.134443	0.176923	-0.121033	-0.0080898	-0.176923	-0.121033	-0.0080898	0	-0.291333	-0.124392	0	-0.249705	0.03378	0.199889	-0.072292	-0.034861	0.168128	-0.0527646	0.0446198	0.13496	-0.00393142	0.0434289	0.159446	0.00274967	0.075307	0.0674964	0.0252005	0.0228098	0.11041	0.0252416	0.0283421	0.117726	0.0246449	0.0361972	0.0754102	0.0499353	0.00695624	0.0586976	0.0808921	-0.00458297	0.0471542	0.0535788
fIhsm11	f	Iceland	0.176986	0.11852	-0.14087	-0.176986	0.11852	-0.14087	0.175958	-0.120923	0.00308999	-0.175958	-0.120923	0.00308999	0	-0.270016	-0.132527	0	-0.227976	0.0415978	0.202878	-0.0602731	-0.0166233	0.173295	-0.0498165	0.0439551	0.142714	-0.00408807	0.0347974	0.163544	0.00283019	0.0645636	0.0726261	0.0114238	0.022605	0.107558	0.0111779	0.0199103	0.129175	0.0286913	0.0420082	0.0883169	0.0373089	0.0128626	0.0611701	0.0787869	-0.00336669	0.0514503	0.0541532
fIhsm19	f	Iceland	0.190581	0.110644	-0.148491	-0.190581	0.110644	-0.148491	0.181297	-0.132885	-0.00885026	-0.181297	-0.132885	-0.00885026	0	-0.301974	-0.14618	0	-0.257156	0.0465725	0.206829	-0.0803362	-0.0329177	0.162935	-0.0638636	0.0473367	0.124325	0.00289332	0.0394186	0.15308	0.00527854	0.0694499	0.084141	0.0303926	0.0345034	0.0853603	0.0105138	0.0268939	0.107892	0.0155452	0.0318413	0.0642154	0.0513805	0.00534303	0.0448405	0.0807253	-0.014765	0.034975	0.0600726
mIhsm39	m	Iceland	0.175007	0.127452	-0.15662	-0.175007	0.127452	-0.15662	0.17254	-0.11206	0.00812949	-0.17254	-0.11206	0.00812949	0	-0.269973	-0.129622	0	-0.228412	0.0373121	0.195442	-0.0728762	-0.0260582	0.177602	-0.062929	0.0466518	0.140281	0.00123706	0.044659	0.165989	0.00232609	0.0677813	0.0671452	0.0181712	0.0149386	0.106239	0.0109336	0.0124742	0.134293	0.0239096	0.0511067	0.0864787	0.0441747	0.00966422	0.0617151	0.0727436	-0.00183567	0.0553601	0.0451215
mIhsm54	m	Iceland	0.189119	0.113734	-0.130651	-0.189119	0.113734	-0.130651	0.154325	-0.0813129	0.0426391	-0.154325	-0.0813129	0.0426391	0	-0.263448	-0.140686	0	-0.249516	0.0212171	0.219025	-0.0696608	-0.0280985	0.182981	-0.0553154	0.0387658	0.14714	-0.0111101	0.0327473	0.163369	0.00466259	0.0668232	0.0691191	0.0102281	0.0148365	0.104149	0.00840919	0.0190778	0.119355	0.0313503	0.046908	0.0797819	0.0416296	0.00236401	0.0597123	0.0691303	-0.00945966	0.0499027	0.0490563
mIhsmA9	m	Iceland	0.184489	0.0996324	-0.133373	-0.184489	0.0996324	-0.133373	0.192234	-0.119854	-0.00802731	-0.192234	-0.119854	-0.00802731	0	-0.272424	-0.150196	0	-0.15295	0.0272277	0.218751	-0.0642262	-0.0223044	0.17826	-0.0557244	0.0593696	0.148469	-0.00625993	0.0525925	0.162262	-0.000762299	0.0721621	0.0755918	0.0206832	0.0239596	0.110086	0.0229825	0.0238195	0.123422	0.0246018	0.0497231	0.0845263	0.0364711	-0.000955349	0.0596739	0.0634999	-0.0140345	0.0433501	0.0531442
fIkef7	f	Iceland	0.184076	0.0903793	-0.135674	-0.184076	0.0903793	-0.135674	0.163445	-0.117758	-0.00150958	-0.163445	-0.117758	-0.00150958	0	-0.255167	-0.127741	0	-0.21847	0.030904	0.192657	-0.0660305	-0.0241675	0.175711	-0.0601533	0.0343628	0.152397	0.00344625	0.0408301	0.171235	-0.00346609	0.059443	0.0936399	0.0170126	0.0278188	0.125029	0.0149891	0.0189243	0.138681	0.0308552	0.0411258	0.0995703	0.0494317	0.0116958	0.0748851	0.0736315	-0.00647225	0.0607038	0.0666435
fIkef9	f	Iceland	0.1701	0.109826	-0.149962	-0.1701	0.109826	-0.149962	0.175403	-0.112717	-0.00111248	-0.175403	-0.112717	-0.00111248	0	-0.272476	-0.139547	0	-0.22176	0.0359174	0.20811	-0.0582508	-0.0189169	0.184326	-0.0532358	0.0456054	0.14765	0.00307504	0.038801	0.16697	0.00906148	0.0619863	0.0749032	0.0144046	0.0233944	0.110166	0.0106377	0.0175122	0.128471	0.0215691	0.0342477	0.0873946	0.03672	0.00968257	0.0612241	0.070486	-0.00577377	0.0567825	0.0475727
fIkef39	f	Iceland	0.17948	0.103283	-0.159888	-0.17948	0.103283	-0.159888	0.184658	-0.11745	-0.00690204	-0.184658	-0.11745	-0.00690204	0	-0.293962	-0.128001	0	-0.247246	0.0207144	0.201849	-0.0637777	-0.0159807	0.173069	-0.0587871	0.0390401	0.133426	0.00441038	0.0354656	0.167666	-0.00946145	0.0663832	0.0710545	0.0204997	0.022312	0.111292	0.0118776	0.0262282	0.116611	0.0255251	0.0442967	0.0723805	0.0470388	0.0150339	0.0483695	0.0879423	0.000586249	0.0439829	0.054379
fIkel5	f	Iceland	0.16973	0.103717	-0.127611	-0.16973	0.103717	-0.127611	0.179834	-0.111572	0.0153064	-0.179834	-0.111572	0.0153064	0	-0.282492	-0.140326	0	-0.25422	0.0400811	0.21485	-0.0595594	-0.0422667	0.176898	-0.0625593	0.0388224	0.141246	0.00147593	0.0398596	0.164846	0.0029585	0.0654894	0.0716187	0.0202908	0.034458	0.107791	0.012077	0.0201648	0.117374	0.0362983	0.0350025	0.0870484	0.0428764	0.00901951	0.0552912	0.0744299	-0.00445941	0.0510981	0.0513982
mIkel11	m	Iceland	0.163135	0.162134	-0.155896	-0.163135	0.162134	-0.155896	0.1751	-0.131746	0.00363184	-0.1751	-0.131746	0.00363184	0	-0.293763	-0.125562	0	-0.224034	0.0500782	0.202137	-0.0764185	-0.0186394	0.163755	-0.0709323	0.0457342	0.141217	-0.00614846	0.0426457	0.15631	0.000536707	0.0789522	0.0785039	0.0244173	0.0247278	0.111883	0.00147431	0.0139124	0.128351	0.0353172	0.0548215	0.0839003	0.0406791	-0.00200373	0.0658719	0.0726451	-0.0153522	0.0504699	0.0578572
mIkelcom	m	Iceland	0.18602	0.0961434	-0.135698	-0.18602	0.0961434	-0.135698	0.180393	-0.127647	-0.000640578	-0.180393	-0.127647	-0.000640578	0	-0.271821	-0.16607	0	-0.231129	0.0429528	0.206709	-0.0618475	-0.0232665	0.154492	-0.0526553	0.0637474	0.131821	-0.00220785	0.0523712	0.150579	0.00178901	0.078377	0.0809093	0.013614	0.0140571	0.117856	0.014852	0.0271899	0.119509	0.0332937	0.0390503	0.0860138	0.0415395	0.00757181	0.0601908	0.0770459	-0.0053044	0.0476586	0.0483521
fIkelgg	f	Iceland	0.184607	0.106052	-0.158378	-0.184607	0.106052	-0.158378	0.171995	-0.133742	-0.000106848	-0.171995	-0.133742	-0.000106848	0	-0.266404	-0.138698	0	-0.227996	0.0423791	0.202733	-0.0682527	-0.018999	0.186743	-0.0577267	0.0268111	0.14192	-0.00226237	0.0372494	0.17253	0.00156349	0.0594702	0.0732083	0.0183405	0.0237525	0.114044	0.0216067	0.0262417	0.119541	0.03242	0.0557121	0.0793894	0.0421776	0.0105098	0.0506495	0.0761485	-0.000226647	0.0486031	0.0520236
fIkelg2	f	Iceland	0.167254	0.111155	-0.143083	-0.167254	0.111155	-0.143083	0.173662	-0.127405	0.00106744	-0.173662	-0.127405	0.00106744	0	-0.272241	-0.159269	0	-0.221966	0.0564142	0.199106	-0.0754874	-0.0232329	0.170807	-0.0655149	0.0446538	0.138701	-0.00394571	0.0446547	0.163026	0.00122435	0.0749173	0.0790282	0.0290284	0.017776	0.104011	0.0304438	0.0181036	0.127636	0.025823	0.043917	0.0843149	0.0491299	0.00389002	0.0658051	0.0707152	-0.00776956	0.0458743	0.0488995
mIkelM1	m	Iceland	0.176326	0.115858	-0.132496	-0.176326	0.115858	-0.132496	0.181588	-0.11719	-0.00200446	-0.181588	-0.11719	-0.00200446	0	-0.27756	-0.1182	0	-0.22666	0.0448092	0.210338	-0.0623836	-0.0245874	0.177217	-0.0731582	0.0360254	0.15146	0.000251923	0.0428058	0.168608	0.000459714	0.0664358	0.0807216	0.0114617	0.0132024	0.109275	0.0158334	0.0177721	0.118525	0.025796	0.0504051	0.0772654	0.0438652	0.00780229	0.0557811	0.0709659	-0.00112595	0.0442669	0.0555761
mIkelS1	m	Iceland	0.178779	0.0945101	-0.141342	-0.178779	0.0945101	-0.141342	0.177519	-0.112765	-0.00319012	-0.177519	-0.112765	-0.00319012	0	-0.26913	-0.156361	0	-0.215535	0.0431058	0.203228	-0.0747364	-0.0439338	0.15925	-0.0579691	0.0557963	0.141721	0.00412278	0.0445558	0.160038	0.00319806	0.0838383	0.0759358	0.00844195	0.0248415	0.115608	0.0213495	0.0295417	0.122953	0.03636	0.040124	0.0893907	0.0443553	0.00656956	0.0561716	0.0772027	-0.00880461	0.0493432	0.0478885
mIkelS6	m	Iceland	0.174956	0.110993	-0.143753	-0.174956	0.110993	-0.143753	0.172175	-0.122607	-0.00370277	-0.172175	-0.122607	-0.00370277	0	-0.267835	-0.139255	0	-0.247377	0.040584	0.201962	-0.0765729	-0.0336672	0.156019	-0.0422034	0.0611361	0.141743	0.00338436	0.0365164	0.162409	-0.00679258	0.0688857	0.0756844	0.0184923	0.0225408	0.105688	0.0233353	0.0290175	0.130575	0.030094	0.0398354	0.0919021	0.0373526	0.00788481	0.0580419	0.0793863	-0.00605559	0.052667	0.0499572
fIkelS14	f	Iceland	0.184764	0.0998443	-0.145425	-0.184764	0.0998443	-0.145425	0.181714	-0.120422	-0.0118183	-0.181714	-0.120422	-0.0118183	0	-0.287677	-0.144875	0	-0.238058	0.0353833	0.19931	-0.056584	-0.0238449	0.168782	-0.0539595	0.0485624	0.139187	0.0051249	0.0385197	0.163159	0.00421841	0.0746954	0.079247	0.0122296	0.0204831	0.114989	0.0158797	0.0210255	0.116619	0.0317178	0.0457461	0.079858	0.0393309	0.0111018	0.0533037	0.0746942	-0.00548444	0.043473	0.0491859
fIhsm1	f	Iceland	0.178396	0.11034	-0.164821	-0.178396	0.11034	-0.164821	0.17653	-0.111654	0.00562922	-0.17653	-0.111654	0.00562922	0	-0.268076	-0.152233	0	-0.23209	0.0345841	0.195809	-0.0689157	-0.0179373	0.165667	-0.0634834	0.0480619	0.138351	-0.00660172	0.0421983	0.155918	0.00215782	0.0718231	0.0776977	0.0177475	0.0276625	0.116422	0.0146372	0.0234632	0.126083	0.0305648	0.0449614	0.0865675	0.0431926	0.00755275	0.060614	0.0806225	-0.00374549	0.0553493	0.0583399
fIhsm3	f	Iceland	0.16657	0.106977	-0.138622	-0.16657	0.106977	-0.138622	0.176487	-0.124751	-0.00898277	-0.176487	-0.124751	-0.00898277	0	-0.25281	-0.116338	0	-0.217345	0.0410651	0.204785	-0.0642924	-0.0205209	0.174994	-0.0610093	0.0321452	0.146833	0.00138175	0.0362937	0.166944	0.00301233	0.0654667	0.103068	0.00157751	0.0211398	0.108225	0.00806056	0.0335059	0.129975	0.0376733	0.0466307	0.096211	0.0418527	0.0114342	0.0665876	0.0707163	-0.00261395	0.0545618	0.0510225
fIhsm4	f	Iceland	0.181652	0.11652	-0.146204	-0.181652	0.11652	-0.146204	0.178728	-0.123262	-0.00831657	-0.178728	-0.123262	-0.00831657	0	-0.285071	-0.115978	0	-0.23129	0.0371556	0.20046	-0.0548952	-0.0313054	0.171313	-0.0655423	0.0452336	0.142445	-0.00252536	0.0436478	0.161308	-0.00687239	0.0674707	0.0765964	0.0207006	0.0169171	0.117398	0.0181943	0.0263742	0.121571	0.0286776	0.0510927	0.0807695	0.0420572	0.00806643	0.0617558	0.0772699	-0.00369604	0.0489926	0.0602385
mIhsm8	m	Iceland	0.195218	0.0931427	-0.162996	-0.195218	0.0931427	-0.162996	0.166365	-0.134065	-0.00203955	-0.166365	-0.134065	-0.00203955	0	-0.259305	-0.153594	0	-0.225288	0.043767	0.193595	-0.0569837	-0.0221939	0.173031	-0.0689845	0.0411302	0.14404	-0.00554878	0.0440138	0.165236	0.00639585	0.0781841	0.0789145	0.0157909	0.0235944	0.116083	0.0157763	0.0304377	0.119296	0.0311791	0.0473602	0.0789974	0.0420729	0.010894	0.0551374	0.080071	-0.00176226	0.0465376	0.0559938
fIhsm10	f	Iceland	0.182769	0.104709	-0.137096	-0.182769	0.104709	-0.137096	0.181137	-0.122966	0.00286212	-0.181137	-0.122966	0.00286212	0	-0.292484	-0.141274	0	-0.24286	0.0440898	0.202767	-0.0725869	-0.0340447	0.174995	-0.0619393	0.0420045	0.143755	-0.004971	0.0414347	0.163641	-0.00345485	0.0611457	0.0656604	0.0296152	0.017727	0.0988312	0.0233764	0.0160778	0.115964	0.033824	0.0416049	0.0735071	0.0525332	0.0098643	0.0561834	0.0772279	-0.00170933	0.0486016	0.0592855
fIhsm13	f	Iceland	0.181511	0.107889	-0.137483	-0.181511	0.107889	-0.137483	0.185278	-0.115273	0.00498551	-0.185278	-0.115273	0.00498551	0	-0.276489	-0.175324	0	-0.232621	0.0625518	0.201852	-0.0676714	-0.0160278	0.169504	-0.0545162	0.0474244	0.140091	-0.000660143	0.0449923	0.158548	0.00722398	0.0776447	0.0686688	0.00955615	0.0176149	0.108048	0.0121863	0.0196082	0.118846	0.0271111	0.0367266	0.0820377	0.0478819	0.0114089	0.0689086	0.0655809	-0.01062	0.0592915	0.0472036
fIhsm14	f	Iceland	0.18091	0.125998	-0.145715	-0.18091	0.125998	-0.145715	0.17924	-0.116907	0.0011202	-0.17924	-0.116907	0.0011202	0	-0.295617	-0.126053	0	-0.236821	0.0411775	0.201599	-0.0627955	-0.0357874	0.160905	-0.0711823	0.0520777	0.139721	-0.0141008	0.0482602	0.158205	0.000740539	0.0744301	0.075911	0.00975974	0.0252348	0.105397	0.00878361	0.0219795	0.114065	0.0289486	0.0385095	0.0800283	0.044698	0.0105296	0.0504301	0.0882662	-0.00935022	0.0391874	0.0687424
mIhsm17	m	Iceland	0.178086	0.113543	-0.138229	-0.178086	0.113543	-0.138229	0.178419	-0.114661	0.00328155	-0.178419	-0.114661	0.00328155	0	-0.289811	-0.155442	0	-0.225269	0.0567992	0.205713	-0.0743094	-0.0328545	0.171595	-0.0689554	0.0416763	0.135871	9.23188e-05	0.046816	0.157402	0.014245	0.0711269	0.0730278	0.00973294	0.0176104	0.104154	0.0169789	0.0250861	0.123788	0.0298065	0.0419209	0.0816972	0.040555	0.00851213	0.0535367	0.0767869	-0.00804231	0.0452496	0.0533133
mIhsm20	m	Iceland	0.181834	0.101884	-0.153952	-0.181834	0.101884	-0.153952	0.176414	-0.115907	-0.00759483	-0.176414	-0.115907	-0.00759483	0	-0.268014	-0.138918	0	-0.235487	0.0467795	0.20067	-0.0704117	-0.035507	0.16602	-0.0652625	0.0472838	0.141203	-0.00625679	0.0459319	0.163679	0.00386184	0.0784386	0.0817063	0.0138318	0.0261513	0.115451	0.0114933	0.0285268	0.132704	0.0289878	0.0334642	0.0847174	0.0425325	0.00811992	0.0567503	0.0784052	-0.00440147	0.0502298	0.0521219
mIhsm45	m	Iceland	0.185689	0.0857455	-0.149007	-0.185689	0.0857455	-0.149007	0.176307	-0.100075	0.0149545	-0.176307	-0.100075	0.0149545	0	-0.255884	-0.178386	0	-0.226627	0.0221557	0.198279	-0.0706609	-0.00752435	0.172161	-0.0613388	0.0612919	0.142805	-0.00947471	0.0561929	0.171183	-0.000676521	0.0856203	0.0845436	0.0139459	0.00350781	0.112229	0.0161265	0.01842	0.126293	0.0285631	0.0452147	0.0857825	0.0462563	0.000136212	0.0646165	0.0748235	-0.012913	0.0532785	0.0547422
mIhsm47	m	Iceland	0.187786	0.0930478	-0.149258	-0.187786	0.0930478	-0.149258	0.171236	-0.128301	-0.00404071	-0.171236	-0.128301	-0.00404071	0	-0.273404	-0.150777	0	-0.234289	0.0314703	0.198328	-0.0779581	-0.0236745	0.169609	-0.0632485	0.0573253	0.141885	-0.00711422	0.0442264	0.161528	0.00244351	0.0735575	0.0781925	0.0221046	0.019329	0.107184	0.0148366	0.018969	0.118156	0.0342495	0.0406562	0.0836405	0.0441705	0.0062061	0.0549793	0.0882999	-0.00860455	0.0463642	0.064357
mIhsm51	m	Iceland	0.181086	0.0906461	-0.140498	-0.181086	0.0906461	-0.140498	0.184797	-0.113939	0.0155051	-0.184797	-0.113939	0.0155051	0	-0.269779	-0.134613	0	-0.2661	-0.0240204	0.201727	-0.0480001	-0.00305008	0.172873	-0.0493923	0.0607232	0.142598	-0.00144125	0.0376871	0.162285	0.00103086	0.0864015	0.0742015	0.0152314	0.0145971	0.101865	0.0189296	0.00972098	0.127311	0.0280928	0.0459198	0.0865305	0.0447072	-0.00150677	0.0581258	0.0827779	-0.00993189	0.0553986	0.05622
fIhsm52	f	Iceland	0.172994	0.113278	-0.135675	-0.172994	0.113278	-0.135675	0.189331	-0.12701	-0.00776921	-0.189331	-0.12701	-0.00776921	0	-0.285406	-0.15709	0	-0.229781	0.0599728	0.215331	-0.0658367	-0.028231	0.169414	-0.0552275	0.053282	0.137168	-0.00571793	0.0496211	0.15912	0.0037998	0.077755	0.0666741	0.0146062	0.0154953	0.103559	0.0159582	0.0177987	0.121075	0.0319893	0.0372625	0.0752054	0.0402936	0.00569824	0.0551347	0.0715658	-0.0159234	0.0471138	0.0543175
mIhsm53	m	Iceland	0.181455	0.109133	-0.138797	-0.181455	0.109133	-0.138797	0.167468	-0.130533	0.00632262	-0.167468	-0.130533	0.00632262	0	-0.261121	-0.127187	0	-0.219633	0.0357402	0.202284	-0.0660316	-0.0317929	0.170362	-0.0619896	0.0471564	0.144329	-0.00865317	0.0488638	0.161765	-0.000665582	0.0794427	0.0810957	0.0128507	0.0148323	0.119936	0.0168272	0.0113447	0.124835	0.029418	0.0447097	0.0864956	0.0441338	0.00808806	0.0636892	0.073878	-0.00125722	0.0525558	0.0556096
mIhsm57	m	Iceland	0.181578	0.116959	-0.148797	-0.181578	0.116959	-0.148797	0.164702	-0.129618	0.0107592	-0.164702	-0.129618	0.0107592	0	-0.287596	-0.148818	0	-0.256117	0.035725	0.200476	-0.0668456	-0.0158337	0.164875	-0.0563959	0.057106	0.14409	-0.00348519	0.0406742	0.163266	-0.00577857	0.0646527	0.0757859	0.0225203	0.0181212	0.112026	0.0118128	0.0159963	0.121862	0.0335461	0.0280542	0.0863312	0.0449178	0.00665884	0.0552231	0.0865442	-0.00782067	0.0450314	0.062696
mIhsm65	m	Iceland	0.188378	0.0935284	-0.147306	-0.188378	0.0935284	-0.147306	0.174105	-0.116596	-0.0134182	-0.174105	-0.116596	-0.0134182	0	-0.277369	-0.153526	0	-0.206739	0.0458729	0.2047	-0.0764807	-0.0415493	0.170245	-0.0492183	0.0467914	0.138375	-0.00565806	0.0434876	0.162213	0.00810927	0.0834085	0.0760917	0.0135446	0.0244857	0.107863	0.0141043	0.0273361	0.121139	0.0337942	0.0499193	0.082602	0.0398189	0.0114928	0.0572444	0.0714261	-0.00538215	0.0500262	0.0462351
mIhsm76	m	Iceland	0.188189	0.0993909	-0.151782	-0.188189	0.0993909	-0.151782	0.181382	-0.113831	-0.00736715	-0.181382	-0.113831	-0.00736715	0	-0.267176	-0.14032	0	-0.234563	0.0545756	0.203188	-0.0471337	-0.0333532	0.18116	-0.0474004	0.0405647	0.144148	-1.06858e-05	0.0424317	0.163998	0.00603123	0.070989	0.0800478	0.00997028	0.0141094	0.118198	0.00776539	0.0220673	0.125016	0.025369	0.048171	0.0871109	0.0371606	0.0106259	0.0606332	0.0684399	-0.000533175	0.0457918	0.0414778
mIhsm87	m	Iceland	0.170008	0.121002	-0.152875	-0.170008	0.121002	-0.152875	0.18044	-0.131971	-0.000345876	-0.18044	-0.131971	-0.000345876	0	-0.280092	-0.14016	0	-0.239828	0.0508107	0.198457	-0.0601118	-0.0200381	0.175053	-0.0700787	0.0343877	0.135906	-0.00294509	0.0440301	0.157593	0.00581392	0.0802348	0.0728491	0.0200546	0.0233893	0.102139	0.0188631	0.032552	0.128428	0.0286916	0.0406393	0.0820465	0.0424131	0.0102931	0.0506573	0.0816545	-0.00545174	0.0433162	0.0585882
mIhsm98	m	Iceland	0.183595	0.105836	-0.160145	-0.183595	0.105836	-0.160145	0.166938	-0.126748	-0.00874536	-0.166938	-0.126748	-0.00874536	0	-0.254283	-0.152552	0	-0.16844	0.0749982	0.206346	-0.0679399	-0.0417693	0.171634	-0.0575906	0.0446804	0.145388	0.00229525	0.0446083	0.172593	0.00823261	0.0700456	0.0815145	0.00294128	0.0202241	0.116837	0.0042519	0.0166996	0.133962	0.0219258	0.0444732	0.0866468	0.0304176	0.00876531	0.0645581	0.0699243	-0.00150443	0.0539586	0.0509025
fIhsm26	f	Iceland	0.189705	0.118637	-0.136956	-0.189705	0.118637	-0.136956	0.180871	-0.124883	-0.00196792	-0.180871	-0.124883	-0.00196792	0	-0.304793	-0.154264	0	-0.254918	0.0350488	0.194415	-0.0563026	-0.0175282	0.152805	-0.0533825	0.0655976	0.133839	-0.00293412	0.048678	0.154056	0.0026047	0.08299	0.0748041	0.0137545	0.0108166	0.108438	0.0088302	0.0176563	0.122562	0.0259012	0.0368736	0.0803662	0.0424174	0.00092087	0.0587508	0.0803598	-0.0166168	0.0428245	0.0647509
fIhsm27	f	Iceland	0.199716	0.0969479	-0.130928	-0.199716	0.0969479	-0.130928	0.162984	-0.13277	-0.00610252	-0.162984	-0.13277	-0.00610252	0	-0.251499	-0.121199	0	-0.203633	0.03187	0.205135	-0.0750228	-0.0228266	0.172177	-0.0638317	0.0388671	0.143955	-0.00412256	0.0421944	0.165278	0.00252911	0.0654048	0.0872783	0.0251259	0.0126047	0.11547	0.0200706	0.0240497	0.128379	0.0320171	0.0364511	0.0954151	0.0509259	0.00216604	0.0789112	0.0694014	-0.00193762	0.0696823	0.0545082
mIhsm29	m	Iceland	0.194353	0.105653	-0.140394	-0.194353	0.105653	-0.140394	0.17414	-0.128652	0.00372198	-0.17414	-0.128652	0.00372198	0	-0.276881	-0.149948	0	-0.253185	0.0289145	0.200738	-0.0687911	-0.0220713	0.1677	-0.0567567	0.0648044	0.127937	-0.00794527	0.0488269	0.159431	-0.00398396	0.0859327	0.0667892	0.0273442	0.00632129	0.0962358	0.0210259	0.0203639	0.114384	0.0208498	0.046823	0.0726046	0.059434	-0.0101033	0.0473821	0.090768	-0.0159062	0.0529822	0.0798543
mIhsm38	m	Iceland	0.186215	0.104799	-0.14368	-0.186215	0.104799	-0.14368	0.175101	-0.124232	0.000447201	-0.175101	-0.124232	0.000447201	0	-0.270318	-0.143896	0	-0.230373	0.0396894	0.201559	-0.0880252	-0.0284411	0.167144	-0.0663378	0.0371321	0.145522	-0.00321167	0.0476843	0.172957	0.00544129	0.0716169	0.0758742	0.017465	0.0192155	0.106716	0.0170724	0.0286615	0.115635	0.044009	0.0435852	0.0825806	0.0443487	0.00902571	0.0482325	0.0881198	-0.00634657	0.0433706	0.0587486
fIkef1	f	Iceland	0.173429	0.100063	-0.134372	-0.173429	0.100063	-0.134372	0.171889	-0.12073	0.00164649	-0.171889	-0.12073	0.00164649	0	-0.278602	-0.146281	0	-0.22446	0.0477952	0.195724	-0.0596071	-0.0240054	0.176476	-0.0568081	0.0347353	0.147983	-0.000328234	0.0429727	0.175503	0.00167243	0.0625037	0.0782735	0.0154205	0.0227741	0.112327	0.0134358	0.0200966	0.123062	0.0350235	0.0417561	0.0978828	0.0453185	0.0144763	0.0621241	0.0777144	-0.000350242	0.0546711	0.053041
fIkef3	f	Iceland	0.180788	0.0989359	-0.149124	-0.180788	0.0989359	-0.149124	0.185026	-0.115021	0.000852219	-0.185026	-0.115021	0.000852219	0	-0.291595	-0.173814	0	-0.255583	0.0430062	0.199849	-0.0618614	-0.0086232	0.165945	-0.0573862	0.0503008	0.140717	0.000384276	0.0450256	0.165453	0.00921021	0.0747511	0.0690719	0.0194657	0.021116	0.102147	0.0102599	0.0149107	0.118331	0.0246012	0.043197	0.0814205	0.0464791	0.00481414	0.0590767	0.0738991	-0.00930721	0.0493877	0.0564474
fIkef20	f	Iceland	0.17919	0.111394	-0.127748	-0.17919	0.111394	-0.127748	0.180475	-0.128227	0.000367147	-0.180475	-0.128227	0.000367147	0	-0.275678	-0.126687	0	-0.240328	0.0451991	0.208239	-0.0603492	-0.0253265	0.172786	-0.0491689	0.0444641	0.144841	-0.00296639	0.0377807	0.16492	0.00080309	0.0675865	0.0821612	0.0122253	0.0157724	0.113743	0.00992027	0.0116193	0.122202	0.0215037	0.0406143	0.0875571	0.0443702	0.00644972	0.0524206	0.0792367	-0.0034466	0.0481676	0.0552099
mIkef25	m	Iceland	0.193575	0.102421	-0.146358	-0.193575	0.102421	-0.146358	0.171806	-0.116915	0.002326	-0.171806	-0.116915	0.002326	0	-0.248056	-0.143759	0	-0.216526	0.0480314	0.200637	-0.0636135	-0.0266129	0.169409	-0.067367	0.0472684	0.146179	-0.00597579	0.0528012	0.166284	-0.00778122	0.086921	0.0744647	0.0159061	0.0136131	0.109972	0.0107181	0.0202843	0.124381	0.0342648	0.0370832	0.0868872	0.0430089	0.00894618	0.0570159	0.081024	-0.0118672	0.0547636	0.0551591
fIkef29	f	Iceland	0.188447	0.0972241	-0.145182	-0.188447	0.0972241	-0.145182	0.180344	-0.116008	0.00612178	-0.180344	-0.116008	0.00612178	0	-0.288648	-0.15943	0	-0.244889	0.0362675	0.198763	-0.0494846	-0.00986902	0.17305	-0.0547541	0.0378034	0.137565	-0.00510464	0.0358523	0.153382	0.00409382	0.0721588	0.0770898	0.0118505	0.0273162	0.106497	0.00738356	0.0253441	0.118415	0.0281053	0.0421287	0.0881773	0.0404731	0.00486315	0.0571642	0.077928	-0.00086735	0.0511125	0.0594034
mIkef35	m	Iceland	0.179497	0.111897	-0.128018	-0.179497	0.111897	-0.128018	0.184349	-0.128921	-0.00182399	-0.184349	-0.128921	-0.00182399	0	-0.274768	-0.129769	0	-0.244102	0.0447381	0.207362	-0.0603017	-0.0225793	0.167689	-0.0482925	0.0482711	0.137164	-0.000932126	0.0336113	0.165709	-0.00167862	0.0698233	0.0761807	0.014427	0.019396	0.113456	0.0102523	0.017179	0.119267	0.0270807	0.0401023	0.0844426	0.0399548	0.00622435	0.0479225	0.0694791	-0.0100472	0.0533305	0.0627939
mIkef40	m	Iceland	0.180029	0.138145	-0.144589	-0.180029	0.138145	-0.144589	0.176893	-0.115057	-0.00483516	-0.176893	-0.115057	-0.00483516	0	-0.288905	-0.141056	0	-0.21048	0.0624916	0.198442	-0.0637366	-0.015281	0.163529	-0.0691404	0.0567467	0.136035	-0.008503	0.0379699	0.155212	-0.00159166	0.0882001	0.0785921	0.0049902	0.00840059	0.108762	-0.000341855	0.0209841	0.120764	0.0254926	0.0422756	0.0814253	0.0445043	0.00659119	0.0481167	0.0804324	-0.00884672	0.0519731	0.069751
mIkef41	m	Iceland	0.194703	0.103907	-0.153267	-0.194703	0.103907	-0.153267	0.176936	-0.129593	0.0166245	-0.176936	-0.129593	0.0166245	0	-0.254952	-0.169098	0	-0.227489	0.0443386	0.197768	-0.0506942	-0.0116078	0.163486	-0.0652466	0.052971	0.145988	-0.0116336	0.0446743	0.160474	0.00469332	0.0797066	0.0834932	0.0129758	0.0294933	0.121178	0.0102343	0.0227413	0.125177	0.0316795	0.0307435	0.0851659	0.0401479	0.00308518	0.0537371	0.0762082	-0.00677447	0.0501117	0.0457704
mIkef49	m	Iceland	0.187272	0.113178	-0.13476	-0.187272	0.113178	-0.13476	0.178972	-0.113816	0.0138845	-0.178972	-0.113816	0.0138845	0	-0.256614	-0.143382	0	-0.221354	0.0343856	0.200031	-0.0725926	-0.00771003	0.177923	-0.0637357	0.0438487	0.139019	-0.00239006	0.0382533	0.167285	0.00177283	0.0770923	0.0780954	0.0168105	0.0124127	0.109782	0.0125403	0.0196716	0.118949	0.0271557	0.0442517	0.0864671	0.0378075	0.00272576	0.0548351	0.0829308	-0.014236	0.0492556	0.0570924
fIkef12	f	Iceland	0.173868	0.111423	-0.141705	-0.173868	0.111423	-0.141705	0.184979	-0.116495	-0.00626358	-0.184979	-0.116495	-0.00626358	0	-0.29734	-0.149827	0	-0.234183	0.0515448	0.202993	-0.0581692	-0.0234722	0.164625	-0.0506968	0.0504304	0.129996	0.000309428	0.0422966	0.166098	0.00553058	0.0714258	0.0796105	0.0172427	0.020995	0.111652	0.0129102	0.0162723	0.127662	0.0166721	0.0329067	0.0866229	0.0476709	0.00646398	0.0594831	0.0804639	0.00312025	0.0479637	0.0481794
fIkef30	f	Iceland	0.174754	0.09376	-0.155507	-0.174754	0.09376	-0.155507	0.173511	-0.121333	-0.00910618	-0.173511	-0.121333	-0.00910618	0	-0.26347	-0.131185	0	-0.237183	0.0400217	0.202914	-0.0658919	-0.0340921	0.179545	-0.0663259	0.0294322	0.151568	-0.00495955	0.0470213	0.178279	0.0107644	0.0568607	0.0796816	0.0212766	0.0282473	0.11522	0.0228485	0.0318238	0.120895	0.0351885	0.0509999	0.0826587	0.0458902	0.0190348	0.0516199	0.0787619	0.000695677	0.0400378	0.0524476
fIkel4	f	Iceland	0.17733	0.113355	-0.147055	-0.17733	0.113355	-0.147055	0.172228	-0.135292	0.000578169	-0.172228	-0.135292	0.000578169	0	-0.290365	-0.161205	0	-0.20706	0.064137	0.196729	-0.0641865	-0.0294298	0.166441	-0.0703968	0.0453302	0.138062	-0.00598251	0.0365355	0.159893	0.000492957	0.0763744	0.0833508	0.015829	0.0324483	0.115277	0.0125018	0.0217032	0.123319	0.0318376	0.0376405	0.0806964	0.0417388	0.0126251	0.0540348	0.0840837	-0.00549477	0.0462526	0.0568058
fIkel10	f	Iceland	0.178867	0.100003	-0.142121	-0.178867	0.100003	-0.142121	0.170491	-0.126385	0.0111214	-0.170491	-0.126385	0.0111214	0	-0.268811	-0.183668	0	-0.224119	0.071684	0.208459	-0.0612933	-0.0151139	0.162518	-0.0295981	0.0576334	0.157752	-0.0284262	0.0550164	0.163725	-0.0191471	0.0382671	0.0791965	0.0128164	0.0153865	0.105114	0.0137762	0.0313575	0.121191	0.0257316	0.0405705	0.0841307	0.0458129	0.00332833	0.0545536	0.0788953	-0.00933848	0.0436868	0.05572
fIkel14	f	Iceland	0.186646	0.100554	-0.148525	-0.186646	0.100554	-0.148525	0.179567	-0.124059	-0.0158741	-0.179567	-0.124059	-0.0158741	0	-0.287399	-0.144067	0	-0.220331	0.041023	0.200577	-0.0573891	-0.0230842	0.169814	-0.0598042	0.0479541	0.140311	-0.0020692	0.0418796	0.165575	4.23108e-05	0.0745108	0.0788395	0.0111907	0.0230989	0.113117	0.0174597	0.0238817	0.116287	0.0333201	0.0515375	0.0738054	0.04321	0.00807536	0.0497872	0.0756336	-0.00878326	0.0435173	0.0485728
fIkel19	f	Iceland	0.181451	0.0982742	-0.146336	-0.181451	0.0982742	-0.146336	0.176053	-0.123158	0.00045565	-0.176053	-0.123158	0.00045565	0	-0.275794	-0.150266	0	-0.219314	0.0471957	0.204033	-0.0489732	-0.0328421	0.167325	-0.0559838	0.0501227	0.139817	-0.000395814	0.0413424	0.163726	-0.000274758	0.0752847	0.0827663	0.0154515	0.0191203	0.11573	0.0150697	0.0174559	0.127866	0.0228262	0.0366202	0.082652	0.0410612	0.00920894	0.0577949	0.0722752	-0.00187433	0.0469205	0.0531859
mIkel20	m	Iceland	0.18614	0.104304	-0.135563	-0.18614	0.104304	-0.135563	0.181679	-0.129154	-0.000515311	-0.181679	-0.129154	-0.000515311	0	-0.275562	-0.129147	0	-0.246229	0.0399781	0.20925	-0.0550648	-0.0256409	0.170049	-0.052785	0.0466728	0.136493	-0.00126683	0.0344397	0.166622	0.00225808	0.0661097	0.0798342	0.0142409	0.0174321	0.112148	0.0101902	0.0116524	0.118523	0.0272193	0.0390116	0.0807611	0.0431109	0.0079701	0.0528979	0.0738057	-0.000306685	0.0469952	0.0538742
mIkel22	m	Iceland	0.186649	0.105784	-0.148205	-0.186649	0.105784	-0.148205	0.171494	-0.134363	0.00173171	-0.171494	-0.134363	0.00173171	0	-0.247815	-0.148622	0	-0.232245	0.0393418	0.201899	-0.0761947	-0.0201809	0.165016	-0.0688136	0.0544498	0.133517	-0.00120068	0.0446461	0.160799	0.00728387	0.0927395	0.0781775	0.0171968	0.0104867	0.115578	0.0241106	0.0142667	0.13003	0.0269903	0.0369838	0.0814827	0.0439534	0.000604741	0.0568773	0.0792665	-0.0126748	0.048143	0.05464
mIkel25	m	Iceland	0.194036	0.0979785	-0.145826	-0.194036	0.0979785	-0.145826	0.172331	-0.120981	-0.00115919	-0.172331	-0.120981	-0.00115919	0	-0.246889	-0.132355	0	-0.225678	0.0358646	0.204083	-0.0605671	-0.0272444	0.168947	-0.0640767	0.0477058	0.143721	-0.00382489	0.0502441	0.16588	-0.00620885	0.0869898	0.0784205	0.0127269	0.0100802	0.111494	0.0143312	0.0195062	0.127092	0.0375813	0.0413357	0.0892094	0.0450167	0.00858984	0.0564059	0.0796805	-0.00937693	0.0544082	0.0507419
mIkel29	m	Iceland	0.191942	0.0956353	-0.143682	-0.191942	0.0956353	-0.143682	0.180483	-0.116553	0.00550512	-0.180483	-0.116553	0.00550512	0	-0.287962	-0.156707	0	-0.241325	0.0359523	0.19778	-0.0519278	-0.00944929	0.174149	-0.055723	0.0382184	0.137022	-0.00213311	0.033467	0.153117	0.00471181	0.0718927	0.077833	0.0120766	0.0252789	0.113786	0.00775215	0.0154398	0.122158	0.0207105	0.0437279	0.0881572	0.0383587	0.00451781	0.0613903	0.082809	-0.00217541	0.0443083	0.0624097
fIkel30	f	Iceland	0.17576	0.0904507	-0.155766	-0.17576	0.0904507	-0.155766	0.175767	-0.119901	-0.0105917	-0.175767	-0.119901	-0.0105917	0	-0.264741	-0.132387	0	-0.238744	0.0380173	0.20357	-0.0689466	-0.03618	0.178042	-0.0657275	0.0295256	0.145074	-0.000665341	0.0457508	0.178129	0.00691815	0.0588509	0.0731003	0.0240175	0.0308427	0.120512	0.0185063	0.0344761	0.11675	0.0415158	0.0611988	0.081594	0.0443965	0.0194361	0.0543225	0.077855	0.00104464	0.0419507	0.0545909
mIkel34	m	Iceland	0.174472	0.124199	-0.133884	-0.174472	0.124199	-0.133884	0.174683	-0.130258	0.00869171	-0.174683	-0.130258	0.00869171	0	-0.289515	-0.134136	0	-0.269549	0.034178	0.201368	-0.0672846	0.00279673	0.176275	-0.0608948	0.032421	0.135639	-0.00603949	0.0384704	0.159059	0.00147954	0.0747997	0.0700153	0.021355	0.0123682	0.111163	0.0102099	0.0203822	0.10648	0.0335901	0.0268404	0.0737181	0.0555393	-0.00211703	0.0517461	0.0811346	-0.00818724	0.0467093	0.0479245
mIkel13	m	Iceland	0.19264	0.0855279	-0.151085	-0.19264	0.0855279	-0.151085	0.178096	-0.115641	-0.00757472	-0.178096	-0.115641	-0.00757472	0	-0.268092	-0.146856	0	-0.239119	0.0306	0.196167	-0.0625215	-0.0314735	0.179016	-0.0566146	0.0382878	0.140921	0.000975999	0.0488289	0.164233	0.00895292	0.0840539	0.0718412	0.0123767	0.0432199	0.106285	0.0101591	0.0233528	0.120821	0.0288617	0.0428064	0.076516	0.0477717	0.00494096	0.0572459	0.0797237	-0.00752307	0.0519173	0.0487273
mIkel21	m	Iceland	0.206842	0.107632	-0.158467	-0.206842	0.107632	-0.158467	0.170603	-0.136302	-0.00635306	-0.170603	-0.136302	-0.00635306	0	-0.265429	-0.120825	0	-0.23866	0.0328109	0.192135	-0.0636367	-0.0138623	0.153627	-0.0803102	0.0508905	0.117803	-0.0197662	0.0506998	0.161972	-0.00884106	0.0756468	0.0657673	0.0299157	0.0136413	0.10071	0.0159616	0.0123722	0.112644	0.0230121	0.0412095	0.0747183	0.0604238	-0.00305483	0.050505	0.103398	-0.0027384	0.0297496	0.0765796
fIkel29	f	Iceland	0.18006	0.101626	-0.153314	-0.18006	0.101626	-0.153314	0.173841	-0.12036	0.000105455	-0.173841	-0.12036	0.000105455	0	-0.279164	-0.154995	0	-0.2309	0.0400796	0.1989	-0.060072	-0.0202741	0.166887	-0.0611431	0.0512401	0.137592	0.000462923	0.0403313	0.164799	0.000533573	0.0653515	0.0785021	0.0166938	0.0244204	0.109277	0.0115056	0.0209625	0.116223	0.0339024	0.0402835	0.0810594	0.0497004	0.00461698	0.0600996	0.0781811	-0.00385799	0.0484385	0.0562103
mIkel8	m	Iceland	0.185711	0.105217	-0.149484	-0.185711	0.105217	-0.149484	0.166797	-0.126825	-0.00266721	-0.166797	-0.126825	-0.00266721	0	-0.269925	-0.154194	0	-0.217204	0.0579385	0.199294	-0.0644647	-0.0178982	0.169195	-0.0732792	0.0395584	0.147086	0.00431958	0.038876	0.164058	0.000251417	0.0823237	0.071419	0.0168006	0.0203672	0.112714	0.0067605	0.0174353	0.123989	0.0313902	0.046261	0.0804883	0.0441865	0.00990073	0.0598438	0.075765	-0.00546599	0.0479364	0.0509203
mSdenA	m	Scandinavia	0.187928	0.111538	-0.139262	-0.187928	0.111538	-0.139262	0.180209	-0.124231	0.00378217	-0.180209	-0.124231	0.00378217	0	-0.281721	-0.144599	0	-0.237255	0.0493799	0.199633	-0.0562179	-0.0323137	0.172556	-0.0585774	0.0527384	0.129986	7.91956e-05	0.0285474	0.155758	0.00295153	0.0719246	0.0719724	0.0148033	0.0222555	0.101532	0.00879536	0.0323667	0.118645	0.0234925	0.0375314	0.083807	0.04133	0.00392801	0.0585302	0.0708472	-0.00864343	0.0489342	0.0514096
mSdengb	m	Scandinavia	0.173001	0.110365	-0.159232	-0.173001	0.110365	-0.159232	0.163766	-0.142972	-0.00714942	-0.163766	-0.142972	-0.00714942	0	-0.286869	-0.152491	0	-0.242836	0.055359	0.201157	-0.0641908	-0.0336757	0.16763	-0.0695189	0.036419	0.13406	0.00360938	0.0511338	0.159074	0.00669505	0.0706533	0.0775448	0.010033	0.0410458	0.114564	0.0114321	0.0371277	0.12042	0.0347708	0.0534551	0.0733595	0.0432766	0.0109089	0.051271	0.0828012	-0.00891176	0.0490103	0.0586916
mSdeng5	m	Scandinavia	0.171199	0.103357	-0.157697	-0.171199	0.103357	-0.157697	0.167638	-0.125223	-0.00163223	-0.167638	-0.125223	-0.00163223	0	-0.275069	-0.157167	0	-0.230273	0.0450777	0.194643	-0.066666	-0.0373143	0.170222	-0.0476018	0.0567244	0.144679	0.000881295	0.0521517	0.16193	0.0116238	0.0664283	0.0921003	-0.00189877	0.0200587	0.113617	0.00865937	0.0261796	0.125914	0.031676	0.0434812	0.0889368	0.0427491	0.0190884	0.0546544	0.0769285	0.00447916	0.0483559	0.0519854
mSdeng6	m	Scandinavia	0.170677	0.0950411	-0.151656	-0.170677	0.0950411	-0.151656	0.171478	-0.130167	-0.0163349	-0.171478	-0.130167	-0.0163349	0	-0.258856	-0.133791	0	-0.220472	0.0373437	0.202657	-0.0695021	-0.036564	0.177633	-0.0605488	0.0480044	0.142332	-0.000789819	0.048651	0.165636	0.00823277	0.0723781	0.0782005	0.0187981	0.0344474	0.110378	0.015514	0.0270316	0.12819	0.0303058	0.0409664	0.0827537	0.0450656	0.00784815	0.0601115	0.0739249	-0.0105633	0.0553509	0.0515059
mSdeng30	m	Scandinavia	0.166785	0.132509	-0.167922	-0.166785	0.132509	-0.167922	0.181522	-0.1144	0.00382409	-0.181522	-0.1144	0.00382409	0	-0.310918	-0.167178	0	-0.259114	0.049924	0.197257	-0.0497051	-0.0193441	0.165452	-0.0654257	0.0587078	0.130873	-0.00352165	0.0534037	0.153224	0.00980929	0.0855835	0.077344	-0.00173207	0.0168299	0.105142	-0.00359381	0.016092	0.115864	0.0280226	0.0454533	0.0669167	0.0406607	0.0119081	0.0543418	0.0647184	-0.0204311	0.0277288	0.0492969
mSdenUR	m	Scandinavia	0.198911	0.120885	-0.148164	-0.198911	0.120885	-0.148164	0.178716	-0.123688	0.00806266	-0.178716	-0.123688	0.00806266	0	-0.306795	-0.157243	0	-0.236138	0.0506082	0.204925	-0.0845198	-0.0719368	0.162559	-0.0731329	0.0656101	0.120114	-0.00690776	0.056818	0.148957	0.00264986	0.102513	0.0663777	0.0171342	0.00771245	0.096104	0.0169269	0.0290299	0.101371	0.0358342	0.0451118	0.0747347	0.0506989	0.00395044	0.0492094	0.0821514	-0.0206584	0.0445569	0.0587903
fSden4005	f	Scandinavia	0.196131	0.0905619	-0.159486	-0.196131	0.0905619	-0.159486	0.1721	-0.122452	-0.0185519	-0.1721	-0.122452	-0.0185519	0	-0.294876	-0.144017	0	-0.2452	0.0316474	0.19922	-0.0528002	-0.0384893	0.157001	-0.0491762	0.056529	0.138477	0.0036204	0.0443291	0.160835	0.00975784	0.0672509	0.0789073	0.0155938	0.0242502	0.114486	0.00652991	0.0200397	0.124537	0.0272338	0.046114	0.0765685	0.0419741	0.016814	0.0546234	0.0777559	-0.000281915	0.0451268	0.0548509
fSden4	f	Scandinavia	0.187684	0.103886	-0.138923	-0.187684	0.103886	-0.138923	0.165579	-0.134107	0.00232161	-0.165579	-0.134107	0.00232161	0	-0.276957	-0.153785	0	-0.231551	0.0554045	0.195892	-0.0624865	-0.0303285	0.165738	-0.049366	0.0425793	0.137741	-0.00116662	0.0468899	0.165432	0.0019931	0.0622327	0.0858043	0.0116736	0.0229499	0.116748	0.0109756	0.0254955	0.122983	0.0308079	0.038683	0.0846491	0.0442512	0.0138905	0.0581405	0.083838	-0.000189927	0.0540572	0.0538858
fSdenKL	f	Scandinavia	0.173258	0.119377	-0.145755	-0.173258	0.119377	-0.145755	0.180101	-0.131712	-0.0127849	-0.180101	-0.131712	-0.0127849	0	-0.274719	-0.13064	0	-0.230711	0.0427824	0.203552	-0.064488	-0.0247341	0.170825	-0.0399149	0.0515183	0.140714	0.00381477	0.0476909	0.166141	0.00288784	0.0556199	0.0797031	0.011423	0.0216248	0.114471	0.0148924	0.032427	0.121917	0.0287131	0.0443631	0.0869627	0.0416639	0.0149217	0.062505	0.0691959	-0.002102	0.0434841	0.0461863
mSnor1526	m	Scandinavia	0.181142	0.111152	-0.140448	-0.181142	0.111152	-0.140448	0.173654	-0.128024	0.00202523	-0.173654	-0.128024	0.00202523	0	-0.274657	-0.166985	0	-0.216433	0.0595738	0.206265	-0.0683616	-0.0307368	0.15875	-0.0625169	0.0586044	0.134447	-0.00755004	0.0538136	0.156988	-0.000165228	0.0856346	0.0754204	0.0127422	0.0135126	0.114531	0.0186246	0.0237341	0.123786	0.0299911	0.0425018	0.0892013	0.0432069	0.0014284	0.061748	0.0738438	-0.00867485	0.0522774	0.0493792
fSnorV1	f	Scandinavia	0.185023	0.130264	-0.167013	-0.185023	0.130264	-0.167013	0.184275	-0.114167	-0.000418639	-0.184275	-0.114167	-0.000418639	0	-0.296074	-0.143625	0	-0.256677	0.048217	0.199296	-0.0547168	-0.0297566	0.157686	-0.0579667	0.0604116	0.133944	0.00011628	0.0434472	0.166495	0.00302474	0.0725578	0.0706309	-0.00249052	0.0270818	0.110035	-0.00382908	0.0239671	0.1145	0.0241151	0.0441643	0.0704384	0.0395675	0.0116348	0.036273	0.0615893	-0.0212452	0.0330458	0.0420476
mSnor1511	m	Scandinavia	0.178319	0.103818	-0.141682	-0.178319	0.103818	-0.141682	0.179521	-0.126263	-0.00820551	-0.179521	-0.126263	-0.00820551	0	-0.290853	-0.144678	0	-0.242706	0.0458303	0.196669	-0.0741678	-0.0319796	0.169077	-0.0730559	0.0479625	0.134594	-0.00320036	0.0471947	0.168832	-0.00504767	0.084342	0.0683609	0.0295071	0.0114124	0.0995928	0.0264988	0.0208089	0.10979	0.0359584	0.0434362	0.0732914	0.0518793	0.00523407	0.0486858	0.090304	-0.00725271	0.0405294	0.062366
fSnor2853	f	Scandinavia	0.175434	0.0987684	-0.141019	-0.175434	0.0987684	-0.141019	0.173244	-0.131185	-0.00477324	-0.173244	-0.131185	-0.00477324	0	-0.27289	-0.14479	0	-0.255796	0.0232896	0.202731	-0.0807895	-0.0328736	0.160867	-0.0510797	0.0582731	0.131173	0.0083026	0.0447857	0.158411	0.0134709	0.0815763	0.0795719	0.0122034	0.0213167	0.11232	0.016036	0.0224161	0.121218	0.0310911	0.0313845	0.0842003	0.0438131	0.0118812	0.0592499	0.0808029	-0.011024	0.0452436	0.0501399
mSnor4764	m	Scandinavia	0.176877	0.115621	-0.144605	-0.176877	0.115621	-0.144605	0.173841	-0.133078	-0.00211995	-0.173841	-0.133078	-0.00211995	0	-0.287264	-0.162637	0	-0.235809	0.0469615	0.20027	-0.0663522	-0.0194058	0.162219	-0.057244	0.0580505	0.133925	0.00659798	0.0405132	0.154297	0.00262543	0.0882423	0.0729866	0.0182214	0.0168694	0.115057	0.012685	0.019186	0.118955	0.0342191	0.0412287	0.0846899	0.0469085	0.0121629	0.0565906	0.0776573	-0.00666083	0.0476759	0.0574173
mSnor4481	m	Scandinavia	0.183871	0.109394	-0.14781	-0.183871	0.109394	-0.14781	0.166764	-0.119702	0.00012987	-0.166764	-0.119702	0.00012987	0	-0.27426	-0.148724	0	-0.218518	0.0223921	0.204249	-0.0573276	-0.0290944	0.162123	-0.0475369	0.0720552	0.134922	-0.00096305	0.0475098	0.163071	0.000376865	0.0879341	0.0828038	0.0133934	0.0149046	0.123667	0.0159211	0.0296491	0.127007	0.02805	0.0326004	0.0851583	0.0389471	0.0020971	0.0698565	0.0673686	-0.0100934	0.0572499	0.0466134
mSdenS25	m	Scandinavia	0.176265	0.0986101	-0.132111	-0.176265	0.0986101	-0.132111	0.175479	-0.129911	-0.00474698	-0.175479	-0.129911	-0.00474698	0	-0.284574	-0.135738	0	-0.253294	0.0263424	0.199698	-0.0717286	-0.0330205	0.162024	-0.0597997	0.0621538	0.139293	-0.0048151	0.0448426	0.170352	0.00478142	0.0657551	0.0690641	0.0194009	0.0222613	0.104925	0.0162748	0.016327	0.127014	0.0329501	0.046866	0.0894017	0.0440872	0.00797574	0.063774	0.0789074	-0.0138357	0.0508163	0.0592173
mSdenS26	m	Scandinavia	0.186737	0.108774	-0.153506	-0.186737	0.108774	-0.153506	0.177043	-0.118107	-0.00460172	-0.177043	-0.118107	-0.00460172	0	-0.275619	-0.159483	0	-0.234905	0.0436829	0.198459	-0.0621964	-0.02682	0.162288	-0.0522317	0.0623834	0.133499	-0.0062293	0.0486246	0.162193	0.0134868	0.078021	0.0803348	0.00615792	0.0188843	0.117326	0.0145038	0.0232127	0.124661	0.0335606	0.0386868	0.0816435	0.034609	0.00933779	0.0562612	0.0696163	-0.00450533	0.0432863	0.0470653
fSdenS27	f	Scandinavia	0.18299	0.103857	-0.147782	-0.18299	0.103857	-0.147782	0.177549	-0.133016	-0.012792	-0.177549	-0.133016	-0.012792	0	-0.282513	-0.140702	0	-0.244838	0.0369824	0.198224	-0.0731594	-0.0268248	0.159905	-0.0472371	0.0513971	0.141944	0.00529505	0.0441185	0.161585	0.00481566	0.0636924	0.0854198	0.0276866	0.022188	0.117774	0.0167625	0.0140075	0.132246	0.027707	0.0412661	0.0901769	0.0452629	0.0073351	0.0639832	0.0741498	-0.0085063	0.0501177	0.0508069
fSdensh	f	Scandinavia	0.187669	0.100366	-0.153858	-0.187669	0.100366	-0.153858	0.170397	-0.146194	-0.00532883	-0.170397	-0.146194	-0.00532883	0	-0.301077	-0.191432	0	-0.20617	0.0523511	0.19649	-0.0544759	-0.00903711	0.16815	-0.062373	0.0523644	0.127346	0.000254616	0.0403284	0.164714	0.0097265	0.0779598	0.0676962	0.00873717	0.0218613	0.107391	0.0101618	0.0222202	0.118336	0.0327458	0.0493264	0.0779177	0.0489675	0.0114784	0.0499298	0.0851642	-0.00629482	0.0448066	0.0503329
mSnor7087	m	Scandinavia	0.193489	0.110617	-0.13427	-0.193489	0.110617	-0.13427	0.174625	-0.116728	-0.00588033	-0.174625	-0.116728	-0.00588033	0	-0.258	-0.154559	0	-0.199866	0.0584662	0.205833	-0.0618994	-0.0316575	0.174113	-0.0593829	0.0560966	0.142291	0.000961714	0.0483284	0.161163	0.013089	0.0849467	0.0799952	0.0176787	0.0168625	0.122627	0.0159687	0.00313291	0.129248	0.0253965	0.0486844	0.093195	0.0355148	-0.01167	0.0656286	0.0547082	-0.0212461	0.0577377	0.0372215
mSden64	m	Scandinavia	0.174867	0.107237	-0.130431	-0.174867	0.107237	-0.130431	0.174505	-0.124009	-0.00334425	-0.174505	-0.124009	-0.00334425	0	-0.285551	-0.143263	0	-0.258041	0.0500101	0.195005	-0.0619052	-0.0294617	0.16609	-0.0338631	0.046848	0.13855	0.00148981	0.0423457	0.159694	0.00617786	0.0586476	0.0898915	0.00878776	0.0152502	0.120951	0.0150027	0.019517	0.131717	0.0239237	0.0362792	0.0874171	0.0431939	0.0137123	0.059536	0.0743054	-0.00165794	0.0461873	0.0525195
mSdenStby	m	Scandinavia	0.180034	0.0889302	-0.146878	-0.180034	0.0889302	-0.146878	0.171045	-0.133175	-0.00579202	-0.171045	-0.133175	-0.00579202	0	-0.268811	-0.15393	0	-0.225869	0.0296557	0.204892	-0.0609824	-0.0435606	0.166824	-0.0461854	0.0611069	0.148021	0.0135496	0.0501709	0.1692	0.0128092	0.0695083	0.0732248	0.00857816	0.0259552	0.113178	0.00822123	0.0285056	0.125983	0.0292574	0.0454788	0.0847389	0.0459006	0.0167321	0.057191	0.0820977	-0.00203583	0.0457841	0.0480293
mSdenTby	m	Scandinavia	0.194569	0.0939635	-0.158544	-0.194569	0.0939635	-0.158544	0.16499	-0.123703	-0.00417932	-0.16499	-0.123703	-0.00417932	0	-0.284529	-0.167408	0	-0.226746	0.0489675	0.199241	-0.0597784	-0.041649	0.152397	-0.0655317	0.0597443	0.132795	-0.00104623	0.0491779	0.153974	-0.00688642	0.0919424	0.0744634	0.0227803	0.0210527	0.109647	0.0231025	0.0250059	0.131345	0.0254368	0.0472205	0.0864715	0.0471477	0.00802298	0.0636619	0.0814512	-0.00667982	0.0529458	0.0591992
fSnor4503	f	Scandinavia	0.175434	0.114575	-0.137174	-0.175434	0.114575	-0.137174	0.180372	-0.108416	-0.0113632	-0.180372	-0.108416	-0.0113632	0	-0.295513	-0.112058	0	-0.21939	0.0300509	0.201308	-0.0648535	-0.0210589	0.174119	-0.0631384	0.0413314	0.138668	-0.00528085	0.0418337	0.164808	-0.00369139	0.0744248	0.0768238	0.0170538	0.0335058	0.117533	0.0158556	0.0167544	0.127619	0.0183477	0.0303698	0.0828267	0.0434496	-0.00138033	0.059281	0.0798208	0.00406447	0.0476284	0.0597047
mSdenV3	m	Scandinavia	0.171473	0.0999849	-0.159163	-0.171473	0.0999849	-0.159163	0.166835	-0.144896	0.00349648	-0.166835	-0.144896	0.00349648	0	-0.280047	-0.16699	0	-0.252827	0.0404153	0.198883	-0.0348982	-0.021327	0.171987	-0.056091	0.0537603	0.137073	0.00371668	0.0411438	0.150587	0.0198597	0.0793989	0.0934886	0.00444449	0.0158303	0.117664	0.00275829	0.0178902	0.125433	0.0267204	0.0346206	0.0873118	0.0344128	0.00888571	0.0481072	0.0630622	-0.0115611	0.0412603	0.0478368
mSdenV82	m	Scandinavia	0.179454	0.0959154	-0.138152	-0.179454	0.0959154	-0.138152	0.185532	-0.119754	-0.0103934	-0.185532	-0.119754	-0.0103934	0	-0.255787	-0.171777	0	-0.215539	0.0638992	0.209284	-0.0695956	-0.0372471	0.170324	-0.0429477	0.0566315	0.13794	0.00137075	0.0517414	0.157244	0.0221676	0.0818232	0.0765308	0.00837495	0.0226642	0.113651	0.0114404	0.0163463	0.121694	0.0313645	0.0369456	0.0928311	0.0395401	0.00402202	0.0662819	0.0647067	-0.00732364	0.0562789	0.0385387
mSden1645	m	Scandinavia	0.183806	0.098229	-0.130944	-0.183806	0.098229	-0.130944	0.181322	-0.12771	-0.00581683	-0.181322	-0.12771	-0.00581683	0	-0.256016	-0.121843	0	-0.211437	0.0351434	0.214075	-0.077333	-0.0312788	0.179035	-0.0659789	0.0441876	0.142987	-0.00344442	0.0467158	0.167043	0.0137061	0.0688205	0.070052	0.00935483	0.0163694	0.109049	0.0108638	0.0174743	0.125377	0.0195826	0.0410472	0.0818295	0.0385061	0.00810478	0.051585	0.0714879	-0.0111205	0.046768	0.0516056
mSdenVV1	m	Scandinavia	0.17983	0.113851	-0.142401	-0.17983	0.113851	-0.142401	0.173725	-0.129662	-0.00326794	-0.173725	-0.129662	-0.00326794	0	-0.297118	-0.146298	0	-0.254241	0.0339483	0.191104	-0.0645584	-0.0181354	0.161348	-0.0694069	0.0504203	0.135493	-0.00011814	0.0371011	0.151591	0.00172436	0.07587	0.0676007	0.0165766	0.0190684	0.116222	0.0239425	0.0321014	0.120526	0.0370017	0.0529204	0.0765185	0.0536372	0.00298702	0.0596097	0.0819293	-0.0107071	0.0492011	0.0636349
mSnorK1653	m	Scandinavia	0.17054	0.0938573	-0.158539	-0.17054	0.0938573	-0.158539	0.17144	-0.131871	-0.0114121	-0.17144	-0.131871	-0.0114121	0	-0.268547	-0.138098	0	-0.241384	0.0322055	0.202587	-0.0745778	-0.0413466	0.168259	-0.0511494	0.050366	0.139514	-0.000518843	0.0435828	0.166682	0.00900759	0.0641538	0.0792864	0.0200376	0.0343527	0.118441	0.0141102	0.031115	0.119703	0.0387539	0.0426063	0.0885841	0.048111	0.0169824	0.0569867	0.0785633	0.00140504	0.0506222	0.0524172
fSnorE1652	f	Scandinavia	0.172352	0.116518	-0.154628	-0.172352	0.116518	-0.154628	0.174336	-0.122088	0.00592532	-0.174336	-0.122088	0.00592532	0	-0.273013	-0.15236	0	-0.219609	0.0499512	0.202638	-0.074732	-0.0231376	0.181639	-0.0724797	0.0376866	0.134392	0.00312037	0.0419188	0.165853	0.00337801	0.0785699	0.0788976	0.0150644	0.0304442	0.113934	0.0136142	0.0240979	0.117416	0.0361325	0.0379391	0.0817935	0.04493	0.0102341	0.0563947	0.0782525	-0.00553118	0.0460608	0.0505714
mSnorE1651	m	Scandinavia	0.169381	0.130862	-0.146932	-0.169381	0.130862	-0.146932	0.177944	-0.126274	-0.00251393	-0.177944	-0.126274	-0.00251393	0	-0.266829	-0.149759	0	-0.205414	0.0396724	0.201331	-0.0692996	-0.0161366	0.160178	-0.0405212	0.0674219	0.143209	0.0024674	0.0423493	0.160868	0.00489132	0.0845825	0.0806813	0.00443878	0.00651575	0.120162	0.0145274	0.0161343	0.133338	0.0306006	0.0402048	0.0893992	0.0352259	0.00257088	0.0755197	0.0566805	-0.00777019	0.0641514	0.0287831
fSnorE1540	f	Scandinavia	0.171172	0.109039	-0.158236	-0.171172	0.109039	-0.158236	0.164157	-0.131872	0.00309391	-0.164157	-0.131872	0.00309391	0	-0.241737	-0.153307	0	-0.2025	0.0505082	0.202023	-0.0856981	-0.0238248	0.172559	-0.0681722	0.0470535	0.140405	-0.00289094	0.051945	0.17122	0.00602902	0.0674578	0.0768942	0.0191607	0.02348	0.116024	0.0165913	0.0188307	0.126409	0.0319807	0.0417568	0.0864718	0.046574	0.0130674	0.0604714	0.0796674	-0.00308545	0.0456125	0.0537628
fSnor1508	f	Scandinavia	0.178933	0.105838	-0.142367	-0.178933	0.105838	-0.142367	0.174777	-0.125722	0.00136495	-0.174777	-0.125722	0.00136495	0	-0.28603	-0.151556	0	-0.252761	0.0329172	0.198725	-0.0778893	-0.0116179	0.160422	-0.0460232	0.0573924	0.141768	0.0037661	0.0350674	0.174646	-0.00240261	0.0609279	0.0828365	0.00820788	0.025004	0.1201	0.0133046	0.0233482	0.13191	0.0230132	0.0279065	0.0832663	0.0400457	0.0142529	0.0560942	0.0844633	-0.00899001	0.0414689	0.0586252
mSnor3706	m	Scandinavia	0.169262	0.115966	-0.148869	-0.169262	0.115966	-0.148869	0.178517	-0.113985	-0.00643489	-0.178517	-0.113985	-0.00643489	0	-0.291491	-0.129884	0	-0.243926	0.0419371	0.193115	-0.0661397	-0.0369542	0.1733	-0.0654394	0.0401197	0.138158	-0.00241914	0.0463878	0.166435	-0.00101637	0.0838311	0.0786168	0.0179665	0.0226551	0.114725	0.0158078	0.0314442	0.125808	0.0287452	0.0459632	0.0802433	0.0462604	0.0150627	0.058195	0.0815305	-0.00993054	0.0493607	0.0531898
mSdenHJ	m	Scandinavia	0.177497	0.118216	-0.149696	-0.177497	0.118216	-0.149696	0.17132	-0.124583	-0.00115542	-0.17132	-0.124583	-0.00115542	0	-0.30389	-0.139245	0	-0.267943	0.0316078	0.197483	-0.0781827	-0.0310489	0.168899	-0.0617581	0.0415428	0.13331	-0.00148035	0.0506972	0.156897	-0.00237808	0.0741944	0.0652544	0.0272837	0.0343715	0.0974064	0.0232535	0.0373173	0.120654	0.0309383	0.0392062	0.0702923	0.0515009	0.00697251	0.0603114	0.0858357	-0.016194	0.0449226	0.066594
mSden3983	m	Scandinavia	0.183262	0.102417	-0.158954	-0.183262	0.102417	-0.158954	0.17808	-0.130295	-0.00309525	-0.17808	-0.130295	-0.00309525	0	-0.275571	-0.146052	0	-0.238269	0.0198601	0.204051	-0.0891377	-0.0169584	0.164624	-0.0715667	0.0509798	0.130268	-0.00363299	0.0478234	0.153943	-0.00640973	0.0860913	0.0728494	0.0253593	0.00775439	0.104287	0.026226	0.0257704	0.112639	0.0362139	0.0477505	0.0739618	0.0541221	0.00433651	0.0528287	0.0892229	-0.0103109	0.0429434	0.0643876
fSden1513	f	Scandinavia	0.194162	0.0967585	-0.15048	-0.194162	0.0967585	-0.15048	0.176792	-0.11896	0.0177451	-0.176792	-0.11896	0.0177451	0	-0.258383	-0.184191	0	-0.202635	0.0354691	0.208613	-0.0748699	-0.0150603	0.173629	-0.0455506	0.0524618	0.141631	0.00272569	0.0487569	0.166783	0.00857819	0.0729712	0.0738287	0.00626893	0.0169828	0.116791	0.00886616	0.0151335	0.12284	0.0278322	0.0420274	0.0716457	0.0397545	0.00254439	0.0569647	0.0764791	-0.013452	0.05032	0.0465106
fSnor4721	f	Scandinavia	0.184137	0.100683	-0.148026	-0.184137	0.100683	-0.148026	0.175418	-0.12574	-0.0131232	-0.175418	-0.12574	-0.0131232	0	-0.255358	-0.147367	0	-0.193262	0.0437381	0.204452	-0.0640589	-0.0369307	0.16884	-0.0450903	0.0559614	0.151376	-0.00642493	0.0567584	0.168591	0.0126993	0.0761477	0.0948841	0.0106424	0.0413529	0.122368	0.00493214	0.0276568	0.128718	0.0291025	0.0359231	0.0908074	0.0367276	0.00540541	0.0603643	0.0725818	-0.00822245	0.0532439	0.0435976
mSnor5280	m	Scandinavia	0.173286	0.103766	-0.148309	-0.173286	0.103766	-0.148309	0.185358	-0.123399	-0.00616288	-0.185358	-0.123399	-0.00616288	0	-0.29054	-0.146419	0	-0.222424	0.0331247	0.203946	-0.0756148	-0.0200357	0.170856	-0.0681631	0.0502861	0.137055	-0.00192193	0.0538287	0.156894	-0.00329991	0.0728088	0.0653622	0.024512	0.0197688	0.104428	0.0179099	0.0225989	0.128441	0.0288318	0.02974	0.0738831	0.0487568	0.0146391	0.0507321	0.078535	-0.00461705	0.0376038	0.05508
fSden1537	f	Scandinavia	0.191007	0.0995161	-0.139717	-0.191007	0.0995161	-0.139717	0.180155	-0.120011	-0.00516993	-0.180155	-0.120011	-0.00516993	0	-0.259234	-0.151702	0	-0.199943	0.0447001	0.205647	-0.0776198	-0.0307671	0.160761	-0.0528143	0.0636782	0.137209	-0.000548979	0.0570188	0.155938	-0.000512654	0.0729704	0.0833876	0.00836955	0.0185034	0.119059	0.00891902	0.0132466	0.138809	0.0296391	0.032611	0.0902401	0.039978	0.0104263	0.064696	0.0736468	-0.00150742	0.0481706	0.0468565
mSnor5278	m	Scandinavia	0.181588	0.0828431	-0.146712	-0.181588	0.0828431	-0.146712	0.174114	-0.131622	-0.0168926	-0.174114	-0.131622	-0.0168926	0	-0.281221	-0.165022	0	-0.216308	0.037034	0.207999	-0.0748117	-0.0475571	0.155999	-0.0406739	0.074454	0.141051	0.00164216	0.0488677	0.154596	0.0035667	0.0838709	0.0766694	0.0196432	0.0261923	0.117276	0.0125651	0.0207356	0.116023	0.0327546	0.0367271	0.0815063	0.0390859	0.0113917	0.0537572	0.0800197	-0.00387573	0.0521691	0.0461751
mSden19	m	Scandinavia	0.187085	0.123393	-0.157258	-0.187085	0.123393	-0.157258	0.169776	-0.125209	-0.00343371	-0.169776	-0.125209	-0.00343371	0	-0.272507	-0.14727	0	-0.219188	0.050232	0.198796	-0.0775738	-0.0321786	0.147801	-0.058298	0.0619683	0.1411	-0.00517731	0.0466429	0.163711	-0.00715133	0.0743338	0.0743705	0.0226515	0.0201087	0.112339	0.0123094	0.0268735	0.125913	0.0371049	0.042731	0.0846468	0.0468627	0.00303182	0.0660446	0.0732584	-0.00928007	0.0551921	0.0523641
fSden12	f	Scandinavia	0.184818	0.114355	-0.151272	-0.184818	0.114355	-0.151272	0.171109	-0.11678	0.00811067	-0.171109	-0.11678	0.00811067	0	-0.288088	-0.160694	0	-0.247156	0.0425436	0.196898	-0.0636519	-0.0146116	0.171947	-0.0561664	0.0483255	0.136369	-0.0020651	0.0407664	0.163442	0.00329917	0.0654855	0.0720716	0.00937454	0.0282181	0.106906	0.0125415	0.0229071	0.119063	0.0307317	0.0400803	0.0844251	0.0452674	0.0104174	0.0521901	0.0775339	-0.00466286	0.0451376	0.0508646
mSnor5304	m	Scandinavia	0.186327	0.0996241	-0.158015	-0.186327	0.0996241	-0.158015	0.172204	-0.136468	-0.00597168	-0.172204	-0.136468	-0.00597168	0	-0.25965	-0.143271	0	-0.232886	0.028549	0.201682	-0.0803352	-0.0167073	0.168578	-0.0571124	0.0469839	0.139291	-0.00382211	0.0445738	0.162365	0.00633196	0.0772011	0.0720433	0.0173474	0.0224673	0.112968	0.0169824	0.0242715	0.119899	0.0334046	0.0333077	0.0775082	0.0447046	0.0120165	0.0533134	0.0848525	-0.00464937	0.0507983	0.05429
mSden4006	m	Scandinavia	0.188768	0.0928129	-0.155883	-0.188768	0.0928129	-0.155883	0.185076	-0.113	-0.0107154	-0.185076	-0.113	-0.0107154	0	-0.284349	-0.185769	0	-0.245547	0.0496113	0.199356	-0.0629347	-0.0268456	0.163962	-0.0459672	0.0651024	0.13719	0.00329258	0.0411373	0.16156	0.0114276	0.0820023	0.0778066	0.0200082	0.0297695	0.107628	0.0193166	0.0244978	0.120057	0.0253112	0.0411955	0.0804199	0.0443525	0.00565408	0.0557359	0.0690103	-0.00888609	0.052144	0.0421761
mSnor4564	m	Scandinavia	0.183516	0.113925	-0.143096	-0.183516	0.113925	-0.143096	0.170221	-0.12545	0.000212594	-0.170221	-0.12545	0.000212594	0	-0.272982	-0.1518	0	-0.21041	0.0453722	0.202259	-0.0765122	-0.0308443	0.166946	-0.0515184	0.0601745	0.141836	-0.00747398	0.0343244	0.16445	0.00822891	0.0857265	0.069079	0.0130379	0.0216485	0.107685	0.014347	0.0194127	0.124078	0.0306721	0.0355267	0.0842462	0.0415299	0.0052882	0.0665185	0.0690593	-0.00422296	0.0502129	0.0433731
fSnor4007	f	Scandinavia	0.185832	0.100536	-0.146787	-0.185832	0.100536	-0.146787	0.166303	-0.124814	-0.00203882	-0.166303	-0.124814	-0.00203882	0	-0.276678	-0.137476	0	-0.236042	0.0498042	0.200687	-0.057012	-0.0248865	0.168443	-0.0728292	0.0340592	0.142153	-0.0137212	0.0433603	0.164515	0.000958473	0.0900237	0.0726131	0.0112192	0.0111985	0.109322	0.0131794	0.00958001	0.123136	0.0279997	0.0419081	0.0812144	0.0487294	0.00958808	0.0545978	0.082091	-0.00631531	0.0509765	0.0530298
fSnor4008	f	Scandinavia	0.176054	0.0903193	-0.154585	-0.176054	0.0903193	-0.154585	0.164398	-0.125443	-0.00444338	-0.164398	-0.125443	-0.00444338	0	-0.27096	-0.174559	0	-0.23614	0.0502366	0.192971	-0.0710277	-0.0240594	0.16196	-0.0512112	0.0603223	0.135982	-0.000134167	0.04596	0.163378	-0.00156883	0.072123	0.0821274	0.0157264	0.0241942	0.110365	0.0117488	0.028978	0.134412	0.0267727	0.0423165	0.0800419	0.0423244	0.00711447	0.0674024	0.0812881	-0.00782976	0.0471284	0.0556504
mSdenS1	m	Scandinavia	0.185288	0.100394	-0.160992	-0.185288	0.100394	-0.160992	0.172246	-0.122738	-0.00585494	-0.172246	-0.122738	-0.00585494	0	-0.256943	-0.127222	0	-0.233609	0.0391308	0.203873	-0.0547668	-0.027292	0.1709	-0.060665	0.0410247	0.142386	-0.00563483	0.0399533	0.168209	-0.000589782	0.0617739	0.0809272	0.0178661	0.03622	0.120235	0.0137675	0.0234802	0.124484	0.0287479	0.0445417	0.0882173	0.0458045	0.0164688	0.0684661	0.0698255	0.00216168	0.051801	0.0435912
fSdenS2	f	Scandinavia	0.18052	0.0988329	-0.156055	-0.18052	0.0988329	-0.156055	0.167457	-0.12568	0.00164237	-0.167457	-0.12568	0.00164237	0	-0.272753	-0.139793	0	-0.232364	0.041811	0.194318	-0.0715191	-0.0273169	0.169402	-0.0713907	0.0365642	0.142684	-0.00360774	0.0376394	0.16634	-0.0012804	0.0564694	0.0892495	0.020276	0.0322691	0.116767	0.0153036	0.0288632	0.120843	0.0267544	0.0515967	0.0782785	0.0471478	0.0113004	0.0549413	0.084726	-0.0075182	0.0523736	0.0608433
fSdenS5	f	Scandinavia	0.170743	0.0992671	-0.169443	-0.170743	0.0992671	-0.169443	0.168441	-0.136655	-0.0170577	-0.168441	-0.136655	-0.0170577	0	-0.264785	-0.145739	0	-0.219469	0.0443058	0.196157	-0.07496	-0.0300494	0.16915	-0.0550331	0.0512679	0.137253	-0.0039317	0.0464907	0.163949	0.00242245	0.0769177	0.0781784	0.0172998	0.0309479	0.113037	0.0176849	0.02737	0.129217	0.0264436	0.0459084	0.0840595	0.0451824	0.0152207	0.0568612	0.0802016	-0.000530814	0.0544992	0.0562186
mSdenS9	m	Scandinavia	0.177652	0.090042	-0.155908	-0.177652	0.090042	-0.155908	0.166945	-0.129436	-0.00774348	-0.166945	-0.129436	-0.00774348	0	-0.277611	-0.147249	0	-0.253211	0.0259799	0.194237	-0.0577306	-0.0295851	0.163218	-0.0477274	0.0496153	0.134247	0.00283543	0.0431556	0.165262	0.00567433	0.0773918	0.0703445	0.0241926	0.0235177	0.11102	0.0145092	0.0232173	0.12455	0.029955	0.0500161	0.0858933	0.0436741	0.0151656	0.0613388	0.0751906	-0.00350732	0.0503277	0.0564698
fSdenS14	f	Scandinavia	0.186383	0.0852965	-0.134824	-0.186383	0.0852965	-0.134824	0.171436	-0.128855	-0.00264039	-0.171436	-0.128855	-0.00264039	0	-0.288778	-0.166472	0	-0.249232	0.0512644	0.202908	-0.0702384	-0.0360475	0.166951	-0.0603205	0.0432751	0.138722	0.00167404	0.0396114	0.155415	0.0074338	0.0718083	0.0774273	0.0171475	0.033081	0.104952	0.0141908	0.0345429	0.122368	0.0314554	0.0338863	0.0830364	0.0432068	0.0155389	0.0549575	0.0792068	-0.010849	0.0477115	0.052052
mSdenS31	m	Scandinavia	0.17239	0.104774	-0.131269	-0.17239	0.104774	-0.131269	0.178046	-0.114558	0.00950305	-0.178046	-0.114558	0.00950305	0	-0.29559	-0.143957	0	-0.265417	0.0376052	0.202322	-0.0587984	-0.032233	0.17891	-0.0655688	0.0368564	0.135902	0.00132138	0.041971	0.155167	0.00420728	0.0839918	0.0744995	0.0197455	0.0233887	0.110805	0.0115196	0.0226003	0.120505	0.0330886	0.039101	0.0796457	0.047141	0.00565052	0.0635456	0.0741961	-0.00706841	0.0530004	0.0470791
fSnor4407	f	Scandinavia	0.166765	0.114398	-0.149028	-0.166765	0.114398	-0.149028	0.18637	-0.123132	-0.0112028	-0.18637	-0.123132	-0.0112028	0	-0.274476	-0.128688	0	-0.237951	0.0359336	0.205073	-0.0636134	-0.0217232	0.175415	-0.057686	0.0481915	0.143702	0.0026558	0.0501822	0.163537	0.0187199	0.0500923	0.0732778	-0.0037065	0.0391539	0.115601	0.00161514	0.0348881	0.127873	0.0298301	0.037954	0.0888516	0.0333958	0.0167995	0.0585186	0.068728	0.00142259	0.0512015	0.0390916
mSnor4665	m	Scandinavia	0.17255	0.121413	-0.139905	-0.17255	0.121413	-0.139905	0.17957	-0.131006	-0.00672835	-0.17957	-0.131006	-0.00672835	0	-0.303172	-0.140684	0	-0.221131	0.0576771	0.201187	-0.0618343	-0.0394308	0.166068	-0.0544429	0.0496227	0.138372	-0.00582914	0.0438294	0.159858	0.00434854	0.0692752	0.0786862	0.0175614	0.0371902	0.114018	0.010101	0.0173562	0.12974	0.0270341	0.0341859	0.0860501	0.0457179	0.0111011	0.0580707	0.0722989	-0.000384128	0.0528672	0.0457298
mSnor4727	m	Scandinavia	0.18328	0.0843297	-0.141674	-0.18328	0.0843297	-0.141674	0.174045	-0.124478	-0.010524	-0.174045	-0.124478	-0.010524	0	-0.267231	-0.144577	0	-0.231706	0.0487054	0.197329	-0.06816	-0.0359241	0.17255	-0.0540319	0.0379842	0.144226	0.00189196	0.0369383	0.168724	0.0129775	0.073521	0.0799063	0.0175546	0.0252345	0.110991	0.0140361	0.0189466	0.126961	0.023633	0.0424207	0.08674	0.045655	0.00952444	0.05959	0.0788327	0.000305446	0.0484893	0.0558648
fSnor2815	f	Scandinavia	0.183301	0.105704	-0.147654	-0.183301	0.105704	-0.147654	0.172239	-0.125683	-0.0052638	-0.172239	-0.125683	-0.0052638	0	-0.279839	-0.160796	0	-0.230976	0.0426006	0.196925	-0.0799826	-0.0180352	0.166062	-0.0639001	0.0585056	0.13644	0.00275836	0.0447584	0.161479	0.00704031	0.0756644	0.0755751	0.0183178	0.0138636	0.113527	0.0159267	0.0200917	0.123934	0.0336996	0.0336559	0.0792618	0.0443329	0.00461179	0.067007	0.0742417	-0.00656541	0.0486565	0.0554937
mSnor2814	m	Scandinavia	0.190709	0.107334	-0.148371	-0.190709	0.107334	-0.148371	0.160788	-0.140549	0.00432168	-0.160788	-0.140549	0.00432168	0	-0.272834	-0.150596	0	-0.224366	0.0424337	0.211279	-0.0475567	-0.0207821	0.169031	-0.0604581	0.0470359	0.134394	-0.0046661	0.0419853	0.155664	0.000921148	0.0820934	0.0717896	0.0174135	0.0185378	0.10688	0.0161685	0.0140727	0.119612	0.0294481	0.043562	0.079845	0.045301	0.00921128	0.0543377	0.0816732	-0.00290152	0.0468092	0.0491089
mSnor2816	m	Scandinavia	0.176141	0.112297	-0.154305	-0.176141	0.112297	-0.154305	0.172939	-0.125024	-0.0019576	-0.172939	-0.125024	-0.0019576	0	-0.269181	-0.157745	0	-0.223475	0.0536067	0.196192	-0.0737125	-0.0216664	0.167291	-0.0643388	0.0443845	0.138967	-0.000528949	0.0476928	0.168987	0.00770028	0.0805215	0.066435	0.0246471	0.0210004	0.109263	0.014382	0.0193438	0.123332	0.0233299	0.0445178	0.0744946	0.0438768	0.00466718	0.0549906	0.0762248	-0.0111645	0.0472522	0.0499507
mSnor2817	m	Scandinavia	0.191724	0.0985336	-0.144324	-0.191724	0.0985336	-0.144324	0.187066	-0.106119	-0.00517819	-0.187066	-0.106119	-0.00517819	0	-0.26787	-0.151904	0	-0.216932	0.0464821	0.207074	-0.0729111	-0.0312501	0.162861	-0.0735649	0.052323	0.13926	-0.00539128	0.0441802	0.161524	0.0133484	0.0828207	0.0753585	0.0125221	0.0128799	0.113438	0.0167669	0.0261768	0.122537	0.0290411	0.0437718	0.0848772	0.0425647	-0.0020259	0.06033	0.0736237	-0.0101164	0.0527458	0.0465819
fSden5	f	Scandinavia	0.166105	0.11034	-0.141122	-0.166105	0.11034	-0.141122	0.176999	-0.117211	0.00057303	-0.176999	-0.117211	0.00057303	0	-0.28839	-0.147671	0	-0.244498	0.0475677	0.204195	-0.0642885	-0.0262274	0.181019	-0.0532464	0.0404003	0.147663	0.00714897	0.0463604	0.166503	0.0171423	0.0626668	0.0972087	-0.00517803	0.0216684	0.125664	-0.00292159	0.0220884	0.124589	0.0325746	0.0372457	0.0882912	0.0397049	0.0101811	0.0767948	0.0610977	0.00642164	0.0643027	0.0333864
mSdenE	m	Scandinavia	0.165902	0.107778	-0.148618	-0.165902	0.107778	-0.148618	0.17635	-0.122169	-0.002509	-0.17635	-0.122169	-0.002509	0	-0.276275	-0.154831	0	-0.217101	0.0451259	0.198765	-0.0680724	-0.0321712	0.166013	-0.0522072	0.0629093	0.142396	-0.00330385	0.0457839	0.178333	0.0107045	0.0684836	0.0811912	0.00769255	0.0212807	0.113102	0.00598707	0.0300219	0.128637	0.0281502	0.0410582	0.0895038	0.0436548	0.0166574	0.0625852	0.0646142	-0.00142353	0.0547376	0.0472589
mSdenJ	m	Scandinavia	0.177531	0.108101	-0.133121	-0.177531	0.108101	-0.133121	0.176986	-0.11681	0.00674872	-0.176986	-0.11681	0.00674872	0	-0.283615	-0.138489	0	-0.255689	0.0414509	0.200206	-0.0635316	-0.03076	0.178863	-0.0714292	0.0362008	0.140706	-0.000717861	0.0475898	0.164272	0.00242492	0.0742107	0.0808266	0.0143397	0.0166857	0.11107	0.0112496	0.0244331	0.121434	0.0263344	0.0489485	0.0765056	0.0572623	0.00906273	0.053514	0.0696457	-0.0268864	0.0427701	0.0520034
mSdenN	m	Scandinavia	0.203102	0.110046	-0.148688	-0.203102	0.110046	-0.148688	0.176414	-0.123196	0.00590257	-0.176414	-0.123196	0.00590257	0	-0.269405	-0.153752	0	-0.227344	0.0442276	0.20344	-0.0575295	-0.0253865	0.16173	-0.0746526	0.0570659	0.130995	-0.00624681	0.0459771	0.155952	0.00448466	0.0898725	0.0642052	0.0145343	0.00504271	0.110438	0.0208994	0.019171	0.125264	0.0269558	0.0379622	0.0761759	0.0440295	0.000306071	0.0571369	0.0795937	-0.0109683	0.0437189	0.0494296
fSdenVe1	f	Scandinavia	0.172384	0.103097	-0.135736	-0.172384	0.103097	-0.135736	0.175891	-0.118821	-0.00055895	-0.175891	-0.118821	-0.00055895	0	-0.270107	-0.136137	0	-0.247746	0.0451056	0.198175	-0.0466784	-0.037877	0.168324	-0.0524036	0.0490271	0.143264	0.00873477	0.0398234	0.168043	0.0120934	0.0692741	0.104283	-0.00764173	0.0197754	0.133463	-0.0095114	0.0299268	0.130176	0.0354681	0.0412213	0.0859965	0.0428206	0.0129663	0.0557773	0.0702136	-0.00280193	0.0479017	0.0377018
mSdenVe2	m	Scandinavia	0.172358	0.133281	-0.155329	-0.172358	0.133281	-0.155329	0.164095	-0.127968	0.00705552	-0.164095	-0.127968	0.00705552	0	-0.281603	-0.159371	0	-0.237657	0.0610699	0.200658	-0.0668614	-0.0233494	0.15969	-0.0612118	0.0592263	0.128364	-0.00649839	0.0482932	0.161603	0.00648279	0.0839211	0.0963261	0.00241512	0.0167009	0.0982905	-0.00302878	0.0125817	0.12053	0.03191	0.040607	0.0796166	0.0448905	0.00822292	0.0555475	0.0817905	-0.00850975	0.0462346	0.0510002
mSdenVeA	m	Scandinavia	0.19282	0.0950888	-0.14129	-0.19282	0.0950888	-0.14129	0.170941	-0.123129	-0.0151482	-0.170941	-0.123129	-0.0151482	0	-0.266025	-0.119823	0	-0.238815	0.0333396	0.197432	-0.0687129	-0.0539887	0.166263	-0.064991	0.0486316	0.137643	0.00888434	0.0459569	0.1667	0.00650588	0.0857988	0.0696666	0.02033	0.0177169	0.111384	0.0190682	0.0246019	0.121678	0.0324226	0.0503899	0.0837816	0.0491832	0.00745036	0.0575342	0.0633287	-0.011507	0.0512057	0.0523974
fSdenBFF	f	Scandinavia	0.181721	0.0929148	-0.149168	-0.181721	0.0929148	-0.149168	0.183744	-0.121729	0.00172951	-0.183744	-0.121729	0.00172951	0	-0.270423	-0.152679	0	-0.249706	0.0168112	0.199256	-0.0569074	-0.0138414	0.155838	-0.0491788	0.0625664	0.145566	-0.00596782	0.0377226	0.170803	0.00125587	0.0735191	0.0801064	0.0195646	0.0220473	0.11284	0.0189714	0.0279219	0.125539	0.0260586	0.0430623	0.0789561	0.0468838	0.00548995	0.0567506	0.0777267	-0.00662153	0.0526541	0.0501588
mSdenBAD	m	Scandinavia	0.184691	0.103555	-0.146174	-0.184691	0.103555	-0.146174	0.162362	-0.130084	-0.00107363	-0.162362	-0.130084	-0.00107363	0	-0.270145	-0.160109	0	-0.215109	0.036076	0.194291	-0.0657279	-0.0231748	0.150818	-0.0628836	0.0615513	0.137803	0.00258458	0.0453012	0.160447	0.00128012	0.0821616	0.0726162	0.0222607	0.0119809	0.112337	0.027977	0.0256543	0.130427	0.0315785	0.04281	0.092318	0.0427442	0.00228504	0.0732567	0.0691446	-0.0107208	0.0603828	0.0511575
mSdenFaI	m	Scandinavia	0.16715	0.108903	-0.138354	-0.16715	0.108903	-0.138354	0.170563	-0.13109	-0.00286871	-0.170563	-0.13109	-0.00286871	0	-0.273381	-0.134646	0	-0.227831	0.0419851	0.199085	-0.0684427	-0.0444286	0.178407	-0.0480548	0.0511319	0.146929	-0.00471829	0.0517391	0.164605	0.00626728	0.0777588	0.0801685	0.00780782	0.0317219	0.118979	0.0125458	0.0227026	0.125942	0.0345848	0.0358003	0.0849998	0.0392525	0.0107936	0.0559962	0.0756046	0.00184995	0.0486535	0.0431395
mSdenGalz	m	Scandinavia	0.168076	0.0953316	-0.150598	-0.168076	0.0953316	-0.150598	0.170402	-0.127681	0.0171337	-0.170402	-0.127681	0.0171337	0	-0.269587	-0.13046	0	-0.272099	-0.0448068	0.196005	-0.0691973	-0.0273256	0.168915	-0.0332039	0.0693017	0.141804	0.00680734	0.0507544	0.167566	0.0289719	0.0684535	0.0961379	0.00329331	0.0191902	0.125551	0.00488898	0.0184524	0.129416	0.0438735	0.0428952	0.0884876	0.0339585	0.0135115	0.0611448	0.0696245	-0.00584225	0.0587358	0.0478307
mSdenGbgq	m	Scandinavia	0.181455	0.125951	-0.125159	-0.181455	0.125951	-0.125159	0.187456	-0.124438	-0.00920619	-0.187456	-0.124438	-0.00920619	0	-0.284965	-0.123861	0	-0.236172	0.043408	0.204677	-0.064373	-0.0182591	0.167197	-0.0435194	0.0523316	0.135878	-0.00272593	0.0349256	0.161476	0.00236117	0.0614361	0.0729673	0.0131919	0.0188829	0.115508	0.0184931	0.024474	0.119814	0.0233555	0.0366686	0.0839018	0.0441739	0.00219969	0.067741	0.0716193	-0.0112607	0.0505599	0.0516904
mSdenGTa	m	Scandinavia	0.178483	0.110112	-0.14649	-0.178483	0.110112	-0.14649	0.166248	-0.137173	-0.00422997	-0.166248	-0.137173	-0.00422997	0	-0.269809	-0.148516	0	-0.234062	0.0442779	0.197643	-0.0689058	-0.0296399	0.160781	-0.0552415	0.056941	0.140378	-0.00241093	0.0437195	0.162775	0.00789244	0.0806641	0.0751086	0.0122248	0.020882	0.111692	0.017144	0.0187664	0.129835	0.0331904	0.0382267	0.0842132	0.0433401	0.00789659	0.0588534	0.0740509	-0.00915437	0.0559209	0.0481146
mSdenGuo	m	Scandinavia	0.185879	0.105812	-0.148072	-0.185879	0.105812	-0.148072	0.166064	-0.115169	0.0158909	-0.166064	-0.115169	0.0158909	0	-0.264004	-0.135535	0	-0.237705	0.0345435	0.199505	-0.0517347	-0.0208217	0.17689	-0.0751626	0.0287807	0.149721	-0.0134122	0.04475	0.175864	0.000491014	0.0566017	0.0783159	0.0217842	0.0310726	0.113325	0.0279809	0.0299693	0.125294	0.0299882	0.0479528	0.0829718	0.043746	0.00899507	0.0648054	0.0671188	-0.0103861	0.0520361	0.0498166
mSdenGaxe	m	Scandinavia	0.186379	0.111991	-0.154098	-0.186379	0.111991	-0.154098	0.180107	-0.119461	-0.00578906	-0.180107	-0.119461	-0.00578906	0	-0.294058	-0.137959	0	-0.22718	0.0463297	0.199221	-0.0716216	-0.0243738	0.171742	-0.0741418	0.0311611	0.134475	-0.000140013	0.0341907	0.159281	-0.00167425	0.082096	0.0687989	0.0203184	0.013205	0.103288	0.021792	0.0346501	0.111156	0.0254299	0.045887	0.0731097	0.0482686	0.0101128	0.0466274	0.0798458	-0.00745635	0.0436923	0.0565186
fSdenGls	f	Scandinavia	0.185776	0.106814	-0.136652	-0.185776	0.106814	-0.136652	0.178881	-0.138634	-0.0110506	-0.178881	-0.138634	-0.0110506	0	-0.271796	-0.14246	0	-0.234548	0.059589	0.208133	-0.0416603	-0.034998	0.170634	-0.0516311	0.0551575	0.136909	0.00699735	0.0302588	0.164431	0.00350393	0.0746212	0.0772062	0.00954868	0.019786	0.119797	0.0159152	0.0171007	0.118362	0.0377317	0.0411658	0.0790153	0.0419759	0.00905516	0.0614881	0.066174	-0.00629968	0.05511	0.0376999
fSdenHesj	f	Scandinavia	0.197885	0.102276	-0.11887	-0.197885	0.102276	-0.11887	0.18764	-0.118988	-0.0023781	-0.18764	-0.118988	-0.0023781	0	-0.292126	-0.166132	0	-0.25188	0.0479031	0.207901	-0.0443917	-0.0213918	0.164894	-0.0380291	0.0617453	0.133763	-0.000905978	0.0441917	0.157348	0.00619505	0.0802591	0.0670533	0.0105063	0.018812	0.110983	0.0119027	0.0211235	0.122051	0.0271229	0.0296715	0.0755343	0.0421171	0.00494404	0.0614489	0.0678464	-0.0155569	0.047573	0.0462514
mSdenHessm	m	Scandinavia	0.167094	0.127739	-0.145657	-0.167094	0.127739	-0.145657	0.166617	-0.122173	-0.00429546	-0.166617	-0.122173	-0.00429546	0	-0.29521	-0.137293	0	-0.237079	0.0354195	0.198424	-0.0697324	-0.0312285	0.160218	-0.0518607	0.0572456	0.144206	0.00701365	0.0390609	0.166387	0.00927812	0.0760534	0.0710936	0.0138303	0.023226	0.11145	0.0189471	0.025432	0.127296	0.0247056	0.0439073	0.0853551	0.0355611	0.00394641	0.067389	0.0675407	-0.0139622	0.0549881	0.0480742
mSdenKel	m	Scandinavia	0.180142	0.10696	-0.153196	-0.180142	0.10696	-0.153196	0.169558	-0.123189	-0.000401305	-0.169558	-0.123189	-0.000401305	0	-0.259237	-0.117301	0	-0.232037	0.04133	0.204447	-0.0619762	-0.0269534	0.182452	-0.0641392	0.024618	0.148725	-0.0066472	0.041017	0.173575	0.00656384	0.0634191	0.0822155	0.0121716	0.0280613	0.111986	0.0172894	0.0231133	0.126267	0.0259114	0.0449269	0.0783598	0.0387016	0.0136713	0.0556605	0.0651128	-0.000957901	0.048069	0.0349124
mSdenKap	m	Scandinavia	0.192038	0.0971143	-0.138859	-0.192038	0.0971143	-0.138859	0.184022	-0.119693	-0.00841288	-0.184022	-0.119693	-0.00841288	0	-0.273769	-0.149788	0	-0.217957	0.0385321	0.202942	-0.0632059	-0.0227488	0.168116	-0.0489706	0.0527206	0.142682	-0.00371243	0.0406467	0.158332	0.00909784	0.0785648	0.0728511	0.0143374	0.0136237	0.107576	0.0207327	0.0154896	0.129865	0.0240502	0.0423568	0.077191	0.0389152	0.00511478	0.0549249	0.0710679	-0.00177956	0.0468271	0.0464604
fSdenKay	f	Scandinavia	0.196069	0.0813939	-0.142851	-0.196069	0.0813939	-0.142851	0.176904	-0.120247	-0.00825876	-0.176904	-0.120247	-0.00825876	0	-0.272554	-0.185675	0	-0.216501	0.0594948	0.206147	-0.0645747	-0.0287359	0.167631	-0.0482249	0.0554243	0.136188	-0.00169407	0.0415722	0.173677	0.0101753	0.0693743	0.0845963	0.00918203	0.0273563	0.1138	0.00915992	0.0213198	0.125763	0.0375036	0.0401725	0.0753234	0.0383375	0.0130826	0.0643327	0.0663874	-0.00654196	0.0537918	0.0452573
mSdennbh	m	Scandinavia	0.184159	0.13501	-0.145242	-0.184159	0.13501	-0.145242	0.182402	-0.121842	0.00459846	-0.182402	-0.121842	0.00459846	0	-0.282557	-0.139761	0	-0.233239	0.0403588	0.201893	-0.0730112	-0.0248847	0.168202	-0.0587263	0.0645857	0.133008	-0.000273304	0.0425063	0.149507	0.00425877	0.0774849	0.0676634	0.0137722	0.010001	0.103315	0.00780759	0.0220599	0.109658	0.0305854	0.0403024	0.0799246	0.0416278	0.000719377	0.0541723	0.0802577	-0.00858943	0.0492029	0.0556907
mSdenKlmr	m	Scandinavia	0.180448	0.10541	-0.159182	-0.180448	0.10541	-0.159182	0.16887	-0.112036	0.00212782	-0.16887	-0.112036	0.00212782	0	-0.280129	-0.156769	0	-0.225613	0.0458597	0.190957	-0.0637791	-0.0335056	0.174628	-0.0578281	0.0402721	0.135247	-0.00611247	0.0488148	0.160346	0.00360066	0.0848692	0.0775527	0.0139865	0.0351374	0.110901	0.00966575	0.0217623	0.126165	0.0262099	0.0517592	0.0844182	0.0396451	0.0102876	0.0573253	0.0730334	-0.00587147	0.0491327	0.0531365
mSdenKhH	m	Scandinavia	0.165925	0.118349	-0.165019	-0.165925	0.118349	-0.165019	0.176522	-0.115982	0.00951294	-0.176522	-0.115982	0.00951294	0	-0.309029	-0.181231	0	-0.246329	0.0667934	0.194676	-0.0614823	-0.0313845	0.168489	-0.0637795	0.0425617	0.141278	-0.00221147	0.0450079	0.161152	0.00520279	0.0789775	0.0721519	0.0226955	0.0444413	0.106455	-0.00121519	0.0274423	0.125101	0.0247092	0.0382521	0.0799321	0.0459679	0.0174408	0.059465	0.0759175	-0.00188932	0.0435519	0.051752
mSdenKr16	m	Scandinavia	0.185714	0.0977869	-0.138551	-0.185714	0.0977869	-0.138551	0.167892	-0.125598	-0.0150343	-0.167892	-0.125598	-0.0150343	0	-0.27724	-0.121816	0	-0.226933	0.0382777	0.199646	-0.0555962	-0.0437238	0.17192	-0.0526445	0.0456342	0.14595	-0.00137193	0.0440753	0.172465	0.00442413	0.0703122	0.0748761	0.0169913	0.0204284	0.113665	0.0205678	0.0249077	0.13075	0.0253971	0.0429441	0.0915809	0.0451086	0.0109651	0.0578319	0.0746117	-0.00646638	0.0508844	0.0460246
mSdenKr61	m	Scandinavia	0.177927	0.119998	-0.142251	-0.177927	0.119998	-0.142251	0.166944	-0.134714	0.00504948	-0.166944	-0.134714	0.00504948	0	-0.268215	-0.15262	0	-0.233694	0.0474244	0.197848	-0.0650621	-0.0337326	0.156442	-0.045327	0.0687838	0.139116	-0.00165089	0.0395976	0.160407	-0.00160043	0.0757949	0.0734039	0.0199964	0.0140423	0.112076	0.0190458	0.0229393	0.128978	0.0278534	0.0437597	0.08926	0.0380166	0.0054006	0.0619259	0.075614	-0.0157137	0.0493767	0.0493533
mSdenKr67	m	Scandinavia	0.176431	0.128769	-0.141615	-0.176431	0.128769	-0.141615	0.172503	-0.130205	0.000893433	-0.172503	-0.130205	0.000893433	0	-0.265317	-0.145444	0	-0.218468	0.0562566	0.205964	-0.0579764	-0.0292664	0.166688	-0.0535836	0.0684065	0.142616	-0.000993239	0.0377294	0.162899	0.000569083	0.0829317	0.0808779	0.00393502	0.0103845	0.113113	0.0116148	0.0288298	0.122352	0.0302611	0.0371379	0.0844519	0.0330238	0.000170184	0.0637434	0.0627255	-0.0129921	0.0458481	0.0421791
mSdenKr314	m	Scandinavia	0.173586	0.120758	-0.13559	-0.173586	0.120758	-0.13559	0.179076	-0.12974	0.0021287	-0.179076	-0.12974	0.0021287	0	-0.263936	-0.14069	0	-0.2309	0.0439043	0.207452	-0.0690957	-0.00834338	0.172112	-0.0458709	0.050289	0.14816	-0.00185352	0.0400193	0.17053	0.00495792	0.0679897	0.0770625	0.0129729	0.012907	0.121311	0.00930808	0.0211247	0.130149	0.0291322	0.0287883	0.0771933	0.0385985	0.00402528	0.0576641	0.0749922	-0.00583364	0.0478705	0.0486429
mSdenTab	m	Scandinavia	0.187184	0.0952172	-0.151669	-0.187184	0.0952172	-0.151669	0.189486	-0.119407	-0.00496017	-0.189486	-0.119407	-0.00496017	0	-0.284702	-0.183386	0	-0.220861	0.0516145	0.20441	-0.0565577	-0.0248024	0.163798	-0.0497283	0.0615095	0.136953	0.00202718	0.0419972	0.157781	0.00735852	0.0796367	0.0724986	0.0173621	0.0308509	0.111542	0.0120902	0.020027	0.125463	0.0295936	0.0407533	0.0810903	0.0405805	0.00861742	0.061134	0.0666766	-0.00347459	0.0457033	0.0467096
mSdenTSB8	m	Scandinavia	0.169886	0.104549	-0.140573	-0.169886	0.104549	-0.140573	0.178774	-0.125893	-0.0114997	-0.178774	-0.125893	-0.0114997	0	-0.269928	-0.147121	0	-0.228761	0.0463143	0.209034	-0.0653334	-0.0343559	0.166164	-0.0354457	0.0663791	0.140299	0.00709927	0.0419907	0.167919	0.00677896	0.0585958	0.0850462	0.0093729	0.0250932	0.122217	0.00909119	0.0172364	0.136959	0.0280914	0.0371517	0.0895583	0.0346745	0.013158	0.0683016	0.0657321	-0.00618675	0.0543943	0.0457404
mBpby15	m	Southern British	0.193881	0.0888854	-0.148775	-0.193881	0.0888854	-0.148775	0.17965	-0.125988	-0.0136063	-0.17965	-0.125988	-0.0136063	0	-0.291602	-0.15327	0	-0.247588	0.0305414	0.203234	-0.0687379	-0.0301837	0.171308	-0.043086	0.0536376	0.139271	0.00715479	0.037636	0.163286	0.00525154	0.0694897	0.0769263	0.0104214	0.0286396	0.11507	0.0120084	0.0236215	0.122122	0.0260837	0.035425	0.08409	0.0416137	0.0036053	0.0553105	0.075988	-0.00296894	0.0491421	0.0423031
mBpby94	m	Southern British	0.188041	0.0928451	-0.148894	-0.188041	0.0928451	-0.148894	0.17563	-0.124127	0.00101399	-0.17563	-0.124127	0.00101399	0	-0.27091	-0.115117	0	-0.243884	0.0234898	0.205213	-0.0707161	-0.0633506	0.172771	-0.0840337	0.0357168	0.140463	0.000229695	0.0454148	0.164818	-0.000333742	0.0734577	0.0640165	0.0296844	0.0238815	0.105634	0.0177736	0.038126	0.114394	0.0335242	0.0519711	0.0810581	0.0523236	0.0114188	0.0565656	0.0886486	-0.00990382	0.0411787	0.0674092
fBpby100	f	Southern British	0.184394	0.102208	-0.13696	-0.184394	0.102208	-0.13696	0.183888	-0.121839	-0.00219525	-0.183888	-0.121839	-0.00219525	0	-0.284848	-0.146034	0	-0.229896	0.0474611	0.209093	-0.052255	-0.0244002	0.17777	-0.0588342	0.037367	0.137497	-0.00526501	0.0457766	0.160697	0.00693173	0.0732776	0.0700614	0.0147314	0.0169486	0.108896	0.0161489	0.0258665	0.122404	0.0202493	0.0406496	0.0877504	0.0414219	0.0043343	0.0754857	0.0643483	-0.0112155	0.0481139	0.0648437
mBpby107	m	Southern British	0.189086	0.0963781	-0.143839	-0.189086	0.0963781	-0.143839	0.176749	-0.125013	0.000228063	-0.176749	-0.125013	0.000228063	0	-0.267418	-0.163474	0	-0.230867	0.044092	0.201034	-0.0673369	-0.0195585	0.167945	-0.0548793	0.0530387	0.142	-0.00354386	0.0433357	0.159949	0.00955601	0.0817261	0.10152	0.0174272	0.0339499	0.0927201	0.0113132	0.028317	0.120496	0.0126078	0.0252085	0.0828811	0.0427214	0.00902041	0.0597033	0.0762625	-0.00931915	0.0454474	0.0569219
fBpby110	f	Southern British	0.182825	0.106474	-0.151455	-0.182825	0.106474	-0.151455	0.185387	-0.115309	-0.00173962	-0.185387	-0.115309	-0.00173962	0	-0.293617	-0.161836	0	-0.222506	0.060713	0.211231	-0.0631494	-0.0347202	0.173364	-0.0558604	0.0462144	0.139943	-0.000221924	0.0404661	0.158714	-0.00452524	0.0700835	0.0936893	0.0192651	0.045268	0.0839225	0.0150781	0.0291644	0.106934	0.0223706	0.0269948	0.0767186	0.0393228	0.0105655	0.0564068	0.0796059	-0.00464807	0.0471894	0.0594734
mBpby114	m	Southern British	0.189398	0.111704	-0.160885	-0.189398	0.111704	-0.160885	0.178495	-0.113095	-0.00552086	-0.178495	-0.113095	-0.00552086	0	-0.267539	-0.141078	0	-0.202769	0.0418482	0.204021	-0.0636486	-0.0310317	0.154706	-0.0608123	0.0586931	0.13757	-0.000145624	0.0471134	0.167818	0.00390461	0.0900309	0.0744932	0.0066702	0.0234234	0.1157	0.00930734	0.0187731	0.13008	0.0107566	0.0280968	0.0867217	0.0355403	0.00738433	0.0590191	0.0740914	-0.00479859	0.0503253	0.0519395
mBpby118	m	Southern British	0.196829	0.0955219	-0.144035	-0.196829	0.0955219	-0.144035	0.170943	-0.12589	-0.00479116	-0.170943	-0.12589	-0.00479116	0	-0.267613	-0.144069	0	-0.224076	0.0319032	0.210903	-0.0599373	-0.0391779	0.175716	-0.041639	0.0548662	0.144179	0.00279932	0.0377569	0.163444	0.00581833	0.0794512	0.0693625	0.0155643	0.0160504	0.105427	0.0140218	0.024839	0.119827	0.0353136	0.0407524	0.0884596	0.037847	0.00559304	0.0545178	0.0628019	-0.00796074	0.0599103	0.0516011
mBpby119	m	Southern British	0.188587	0.109631	-0.137677	-0.188587	0.109631	-0.137677	0.171118	-0.119057	-0.00720421	-0.171118	-0.119057	-0.00720421	0	-0.285416	-0.151228	0	-0.211294	0.0367527	0.193847	-0.0771124	-0.0241341	0.161803	-0.0575387	0.0549909	0.137727	-8.32565e-05	0.0420608	0.159461	0.00677136	0.0829325	0.0853025	0.00892903	0.0156789	0.121198	0.0208376	0.0208591	0.123213	0.0346008	0.0382514	0.0888094	0.0433384	0.00849515	0.0629611	0.0756453	-0.0129264	0.0496449	0.050123
fBpby126	f	Southern British	0.186385	0.115237	-0.156491	-0.186385	0.115237	-0.156491	0.175486	-0.126159	-0.00701705	-0.175486	-0.126159	-0.00701705	0	-0.275567	-0.131731	0	-0.219582	0.0461979	0.212011	-0.0620786	-0.0449719	0.163068	-0.0680821	0.0507111	0.130062	-0.00298392	0.0468366	0.156548	-0.00173702	0.0823533	0.0636746	0.0180592	0.0197331	0.099218	0.0194809	0.0197205	0.118647	0.0344973	0.052726	0.0851408	0.0352862	0.00656265	0.0573317	0.0771225	-0.016795	0.0501914	0.0554105
mBpby142	m	Southern British	0.184389	0.0984212	-0.151239	-0.184389	0.0984212	-0.151239	0.178631	-0.121994	-0.00193107	-0.178631	-0.121994	-0.00193107	0	-0.271062	-0.15179	0	-0.228037	0.0464039	0.200174	-0.0491852	-0.0268426	0.174257	-0.0662025	0.0455937	0.142178	-0.00949368	0.0497411	0.160067	-0.00206766	0.0874759	0.0931436	0.0210846	0.0304046	0.0898124	0.0214629	0.0174748	0.109645	0.0256038	0.0319791	0.0773725	0.0484483	0.00276803	0.0431342	0.074254	-0.0116589	0.0530715	0.0619377
mBpby143	m	Southern British	0.202701	0.0769182	-0.137225	-0.202701	0.0769182	-0.137225	0.176124	-0.126072	-0.00332994	-0.176124	-0.126072	-0.00332994	0	-0.282982	-0.162549	0	-0.244321	0.0295238	0.198013	-0.0636076	-0.0155613	0.172789	-0.0725108	0.042961	0.138803	-0.0118691	0.0527581	0.16347	0.0137356	0.0827669	0.068544	0.0163925	0.0216865	0.0961008	0.0220851	0.020482	0.118607	0.0196646	0.0380181	0.0714701	0.0450459	0.00543817	0.0567854	0.0999076	-0.0141166	0.0377617	0.0852151
mBpby144	m	Southern British	0.181721	0.1129	-0.136324	-0.181721	0.1129	-0.136324	0.183549	-0.123817	-0.00647117	-0.183549	-0.123817	-0.00647117	0	-0.276043	-0.151722	0	-0.212351	0.0633145	0.208225	-0.0584752	-0.0296538	0.176299	-0.0486379	0.0531323	0.147311	-0.0091324	0.0483804	0.168743	0.00263902	0.0805582	0.0739743	0.0148408	0.0174332	0.112694	0.0190561	0.0252002	0.130332	0.0168619	0.0335266	0.0719849	0.0420491	0.00605308	0.0571392	0.0749516	-0.0125451	0.0456869	0.0551973
fBpby155	f	Southern British	0.175032	0.115441	-0.16466	-0.175032	0.115441	-0.16466	0.176587	-0.11478	0.0109513	-0.176587	-0.11478	0.0109513	0	-0.281203	-0.200214	0	-0.233417	0.0595031	0.196447	-0.0745291	-0.00897449	0.154934	-0.0420757	0.0622467	0.132922	-0.000319327	0.0455124	0.154327	-0.00910271	0.0728807	0.074874	0.0180923	0.0257535	0.104128	0.0196138	0.0295338	0.124408	0.0227938	0.0313705	0.0824518	0.0428289	0.00469791	0.0562978	0.0760958	-0.0135082	0.0498288	0.0504961
mBpby177	m	Southern British	0.182348	0.090871	-0.150157	-0.182348	0.090871	-0.150157	0.164748	-0.126064	0.00899578	-0.164748	-0.126064	0.00899578	0	-0.279301	-0.159422	0	-0.245523	0.0504066	0.19978	-0.0551664	-0.0441849	0.174179	-0.0570044	0.0447205	0.148641	0.000597299	0.0462756	0.171163	-0.000321758	0.063597	0.0757221	0.0152838	0.0202232	0.11632	0.016875	0.0236105	0.122332	0.0310071	0.0469036	0.0780771	0.0476972	0.01115	0.0507868	0.0784589	-0.0019126	0.0476106	0.0555446
mBpby185	m	Southern British	0.189398	0.0935969	-0.152525	-0.189398	0.0935969	-0.152525	0.167706	-0.125959	0.00280451	-0.167706	-0.125959	0.00280451	0	-0.282317	-0.139023	0	-0.236499	0.0388215	0.210696	-0.0468789	-0.0588415	0.165097	-0.055334	0.0537755	0.142183	0.00102515	0.040735	0.156611	-0.00278378	0.0773004	0.0904195	0.0101227	0.0229085	0.0874007	0.0188069	0.0256809	0.124269	0.0292419	0.037414	0.0886331	0.0435066	0.0107674	0.0652497	0.0755674	0.00138995	0.050549	0.0520692
mBpby207	m	Southern British	0.182012	0.104235	-0.152539	-0.182012	0.104235	-0.152539	0.171818	-0.131288	-0.0047217	-0.171818	-0.131288	-0.0047217	0	-0.262207	-0.15675	0	-0.211564	0.0420928	0.201234	-0.0803376	-0.0245133	0.165544	-0.0661629	0.0505427	0.143733	-0.00542603	0.0505164	0.16142	0.00643216	0.0777325	0.07087	0.0231546	0.0249908	0.103328	0.0206019	0.0324388	0.123774	0.0341835	0.0406292	0.081289	0.0430036	0.00939833	0.0589632	0.0780676	-0.00733685	0.0494424	0.0581734
mBpby212	m	Southern British	0.169751	0.105712	-0.155091	-0.169751	0.105712	-0.155091	0.174114	-0.127901	-0.00868838	-0.174114	-0.127901	-0.00868838	0	-0.270294	-0.134405	0	-0.229584	0.0413952	0.194895	-0.0704884	-0.0417399	0.183538	-0.0573656	0.0414588	0.146801	-0.00637514	0.0481447	0.175127	0.0114314	0.0747761	0.0692545	0.0203893	0.0271116	0.0993868	0.0183427	0.0372211	0.129048	0.0302825	0.0400048	0.0844547	0.0418865	0.0149695	0.0583611	0.0791477	-0.00426136	0.0485282	0.0575897
mBpby255	m	Southern British	0.19149	0.105029	-0.120172	-0.19149	0.105029	-0.120172	0.189225	-0.111758	-0.00103927	-0.189225	-0.111758	-0.00103927	0	-0.293503	-0.150202	0	-0.219706	0.0452107	0.217982	-0.0589695	-0.0359708	0.153958	-0.0431024	0.0655816	0.13348	-0.00233104	0.0471808	0.154736	-0.00227272	0.0785376	0.0675086	0.00502184	0.00845894	0.109079	0.00841792	0.0137687	0.117202	0.0226026	0.0299765	0.0832686	0.0362486	-0.00486877	0.0605121	0.069385	-0.00998999	0.0461068	0.0452505
fBpby276	f	Southern British	0.186987	0.120882	-0.149502	-0.186987	0.120882	-0.149502	0.186478	-0.114641	0.00225862	-0.186478	-0.114641	0.00225862	0	-0.307512	-0.167555	0	-0.22226	0.0382657	0.201641	-0.0657779	-0.0113325	0.162198	-0.055479	0.0604509	0.13272	-0.00861326	0.0488015	0.15099	-0.00374516	0.0799289	0.0642918	0.0257635	0.0231564	0.0950463	0.0228051	0.027087	0.108663	0.0156627	0.0405577	0.0712102	0.0433396	0.000851782	0.0528778	0.0799809	-0.0106452	0.0410818	0.0624234
mBpby284	m	Southern British	0.172112	0.113251	-0.13816	-0.172112	0.113251	-0.13816	0.176947	-0.112661	0.0119598	-0.176947	-0.112661	0.0119598	0	-0.290097	-0.184849	0	-0.233201	0.049493	0.204487	-0.0721943	-0.0205099	0.170964	-0.056139	0.0579891	0.142532	0.00508786	0.0504389	0.166086	0.00516109	0.0860198	0.0661551	0.0200946	0.0218416	0.0944969	0.0169448	0.0229255	0.116509	0.0304157	0.0344902	0.0816796	0.0435114	0.00166927	0.0556124	0.077006	-0.0146517	0.0481529	0.0551169
mBpby286	m	Southern British	0.205495	0.114849	-0.132382	-0.205495	0.114849	-0.132382	0.183828	-0.121978	-0.00262019	-0.183828	-0.121978	-0.00262019	0	-0.308514	-0.14281	0	-0.245666	0.0304209	0.205806	-0.0675636	-0.0367018	0.153184	-0.0678482	0.060912	0.126054	-0.00866772	0.0493137	0.147115	0.00223188	0.0858385	0.0649043	0.0318472	0.0145416	0.0859883	0.0288777	0.019493	0.115979	0.0274564	0.03683	0.0696542	0.0525623	-0.00502673	0.0576503	0.0863412	-0.0217816	0.0488259	0.0630252
mBpby290	m	Southern British	0.181366	0.103342	-0.150173	-0.181366	0.103342	-0.150173	0.166907	-0.122337	0.0169887	-0.166907	-0.122337	0.0169887	0	-0.293311	-0.165681	0	-0.244723	0.044684	0.201502	-0.0587854	-0.0323338	0.159991	-0.0716522	0.0537696	0.134341	-0.0155971	0.0434687	0.156953	-0.00206207	0.0623672	0.0774075	0.0161477	0.0284539	0.0996898	0.0188192	0.0306118	0.114788	0.0303811	0.0408596	0.084814	0.0520581	-0.00162104	0.0540023	0.0848748	-0.00679493	0.0432853	0.0617879
mBpby298	m	Southern British	0.173866	0.129396	-0.13848	-0.173866	0.129396	-0.13848	0.163139	-0.115597	0.0090686	-0.163139	-0.115597	0.0090686	0	-0.265696	-0.128785	0	-0.232448	0.0432402	0.193208	-0.051388	-0.0305003	0.168557	-0.063147	0.0543973	0.14924	-0.0031524	0.0373303	0.17148	0.00233126	0.082205	0.0786738	0.014561	0.0199353	0.102771	0.0183847	0.0254857	0.13163	0.0254658	0.0284703	0.0923529	0.0412396	0.0011045	0.0658384	0.0765116	-0.0127381	0.0598452	0.0543634
fBpby309	f	Southern British	0.181631	0.109633	-0.129427	-0.181631	0.109633	-0.129427	0.183111	-0.128398	-0.00851042	-0.183111	-0.128398	-0.00851042	0	-0.303906	-0.14726	0	-0.216657	0.0468413	0.210099	-0.0731714	-0.0335584	0.170552	-0.0548354	0.0576134	0.138766	-0.00708438	0.041197	0.153383	-0.000784229	0.0772848	0.0645567	0.0216004	0.0190355	0.0882899	0.0206237	0.0216898	0.116875	0.025321	0.0372693	0.0782863	0.0480054	0.00558196	0.0534047	0.0821922	-0.00997735	0.0496705	0.0606539
fBpby322	f	Southern British	0.192607	0.108961	-0.14012	-0.192607	0.108961	-0.14012	0.178642	-0.116529	-0.000594347	-0.178642	-0.116529	-0.000594347	0	-0.293035	-0.153117	0	-0.235946	0.0359936	0.208828	-0.0594377	-0.0284253	0.164493	-0.0519869	0.0540089	0.138835	-0.00900882	0.0533093	0.16139	-0.000596533	0.0819467	0.0655381	0.025461	0.0300893	0.0945221	0.0279236	0.0298391	0.120234	0.0199428	0.0428264	0.0698021	0.0419401	0.00567234	0.0497789	0.0783048	-0.00981143	0.0416151	0.0586309
mBpby381	m	Southern British	0.191189	0.113769	-0.136973	-0.191189	0.113769	-0.136973	0.16836	-0.123506	0.00497497	-0.16836	-0.123506	0.00497497	0	-0.269319	-0.142775	0	-0.222851	0.0477668	0.19509	-0.0574589	-0.0130765	0.174017	-0.0657569	0.046047	0.139598	-0.00741448	0.0460422	0.168944	0.0057535	0.0684886	0.0744392	0.0213328	0.0200172	0.0963321	0.011163	0.0140141	0.131725	0.0206793	0.0311883	0.0924583	0.0414318	0.00670705	0.0677286	0.0721233	-0.0118728	0.0592938	0.0561109
mBpby392	m	Southern British	0.183223	0.117543	-0.150623	-0.183223	0.117543	-0.150623	0.16613	-0.124985	0.00111092	-0.16613	-0.124985	0.00111092	0	-0.265909	-0.143773	0	-0.215641	0.0460826	0.199816	-0.0769472	-0.0296358	0.160296	-0.0642957	0.0551108	0.148641	-0.00706714	0.0509941	0.164879	0.00222155	0.0695654	0.0770093	0.0268508	0.0238824	0.1036	0.0250608	0.0254151	0.134721	0.0188654	0.0332077	0.0866847	0.0470573	0.00590271	0.057248	0.0729575	-0.0121071	0.0542526	0.0505352
mBpby393	m	Southern British	0.193631	0.0880494	-0.149034	-0.193631	0.0880494	-0.149034	0.166513	-0.130751	-0.0204305	-0.166513	-0.130751	-0.0204305	0	-0.272999	-0.137958	0	-0.220516	0.0350598	0.202406	-0.0780934	-0.0328662	0.16197	-0.0518379	0.0435196	0.14486	-0.00132502	0.0456179	0.164037	0.00659273	0.0699922	0.0729347	0.0194912	0.0285687	0.108032	0.0183274	0.0320724	0.128445	0.0267426	0.0352621	0.0805482	0.0427837	0.0117628	0.0556177	0.0880105	-0.00562229	0.0499417	0.0612228
fBpby398	f	Southern British	0.19519	0.0970041	-0.140759	-0.19519	0.0970041	-0.140759	0.171614	-0.124794	-0.00124257	-0.171614	-0.124794	-0.00124257	0	-0.271085	-0.134491	0	-0.226108	0.0306178	0.202515	-0.0550871	-0.0314773	0.175622	-0.0468989	0.0399194	0.144255	-0.000333072	0.0394212	0.171822	0.00349934	0.0668856	0.0769951	0.0183632	0.0310772	0.100499	0.0138707	0.0305027	0.130453	0.0270647	0.0369977	0.0892761	0.0373881	0.00891005	0.0656711	0.0704323	-0.00712314	0.0553639	0.0522869
mBpby401	m	Southern British	0.205008	0.0944002	-0.142471	-0.205008	0.0944002	-0.142471	0.181241	-0.117015	-0.00318433	-0.181241	-0.117015	-0.00318433	0	-0.291032	-0.142152	0	-0.241317	0.0293566	0.204409	-0.0585093	-0.0251532	0.16984	-0.0622043	0.0372005	0.132689	-0.00709251	0.0491296	0.1548	0.000265616	0.0802375	0.0789417	0.0129607	0.0135983	0.105042	0.0175862	0.0252646	0.122374	0.035082	0.0415003	0.0810835	0.0483018	0.00301249	0.0558852	0.0765303	-0.0120991	0.0453128	0.0554605
mBpby403	m	Southern British	0.205243	0.116547	-0.11772	-0.205243	0.116547	-0.11772	0.186397	-0.122978	0.00604725	-0.186397	-0.122978	0.00604725	0	-0.289229	-0.160018	0	-0.205717	0.0648126	0.202858	-0.0507423	-0.0203282	0.162407	-0.0642736	0.0537726	0.135329	-0.00633246	0.0334038	0.166655	-0.00170938	0.0768049	0.0711691	0.00780332	0.0252597	0.106499	0.012405	0.0132489	0.109819	0.0311098	0.0266051	0.0877494	0.0384246	-0.00073416	0.0594013	0.072312	-0.0250196	0.053328	0.0502388
fBpby500	f	Southern British	0.186701	0.0905495	-0.144857	-0.186701	0.0905495	-0.144857	0.176248	-0.123181	-0.0109335	-0.176248	-0.123181	-0.0109335	0	-0.267895	-0.153535	0	-0.223632	0.0429948	0.201911	-0.0795944	-0.0453316	0.169857	-0.0408715	0.0579492	0.139769	0.000610744	0.0522997	0.159308	0.00631376	0.0724421	0.0780708	0.0141369	0.0205289	0.110519	0.0166587	0.0271613	0.122463	0.0267232	0.0495754	0.0839149	0.0407372	0.00709317	0.0602835	0.0759883	-0.0132904	0.0460483	0.0578362
fBpby566	f	Southern British	0.198446	0.0891274	-0.143328	-0.198446	0.0891274	-0.143328	0.177435	-0.120135	-0.0151139	-0.177435	-0.120135	-0.0151139	0	-0.272328	-0.154502	0	-0.219983	0.0427128	0.204574	-0.0611463	-0.0254508	0.163578	-0.0520651	0.055464	0.141662	0.00330608	0.0485133	0.160177	0.00417011	0.0757774	0.06686	0.0193633	0.0215221	0.107914	0.00935268	0.0155688	0.125241	0.0277617	0.0319384	0.0860424	0.0424441	0.0101573	0.0600082	0.0738494	-0.00535321	0.0477883	0.0537464
fBpby568	f	Southern British	0.181785	0.103953	-0.141483	-0.181785	0.103953	-0.141483	0.184752	-0.112006	-0.00271924	-0.184752	-0.112006	-0.00271924	0	-0.273683	-0.135655	0	-0.226953	0.0368692	0.205595	-0.0620423	-0.0189209	0.16319	-0.0617121	0.0548323	0.137298	-0.0106933	0.0433293	0.158954	-0.0116398	0.0593344	0.077544	0.0128397	0.0218265	0.119197	0.0151285	0.0200634	0.120568	0.0370829	0.0353003	0.0875572	0.0439686	0.00568382	0.0673258	0.0677874	-0.00910817	0.0480374	0.0518235
fBpby574	f	Southern British	0.200256	0.1072	-0.153485	-0.200256	0.1072	-0.153485	0.186851	-0.116164	-0.00959546	-0.186851	-0.116164	-0.00959546	0	-0.270251	-0.125175	0	-0.227304	0.0296607	0.202437	-0.0646005	-0.0164299	0.162741	-0.0612197	0.0495128	0.140528	-0.00184498	0.0435099	0.153168	-0.00480686	0.0742993	0.0700965	0.0121778	0.0196467	0.108059	0.0168462	0.0156368	0.126409	0.0235954	0.0385196	0.0831222	0.044485	0.00886656	0.0709719	0.0746623	-0.00559224	0.0528732	0.0602163
fBpby625	f	Southern British	0.180969	0.0934223	-0.146167	-0.180969	0.0934223	-0.146167	0.176632	-0.12472	-0.00675327	-0.176632	-0.12472	-0.00675327	0	-0.280553	-0.164846	0	-0.24613	0.0550124	0.19995	-0.0555972	-0.0261542	0.164415	-0.0449611	0.055601	0.144099	0.00252906	0.041347	0.168714	0.00368672	0.0639487	0.082976	0.00378127	0.0303181	0.113915	0.0041403	0.0291951	0.12607	0.029506	0.0304017	0.0819884	0.0456068	0.00634563	0.0563272	0.0772361	0.00137872	0.0456273	0.0534678
fBpby638	f	Southern British	0.194253	0.100122	-0.157681	-0.194253	0.100122	-0.157681	0.169234	-0.12411	0.00744035	-0.169234	-0.12411	0.00744035	0	-0.279218	-0.16815	0	-0.225472	0.0230216	0.20229	-0.0597312	0.0016033	0.165004	-0.0551374	0.0536913	0.128169	0.00623979	0.036663	0.166546	-0.00189096	0.0671286	0.07857	0.0109477	0.00548937	0.102385	0.0184536	0.0248979	0.108875	0.0351169	0.0388565	0.0832694	0.0463396	0.00753629	0.0569716	0.0818671	-0.00439495	0.0451247	0.0550396
fBpby642	f	Southern British	0.178647	0.097588	-0.13718	-0.178647	0.097588	-0.13718	0.178801	-0.121213	0.00474611	-0.178801	-0.121213	0.00474611	0	-0.256802	-0.156142	0	-0.230237	0.0392985	0.204754	-0.080269	-0.0225237	0.174398	-0.0457487	0.0507255	0.140776	-0.00255219	0.0399832	0.16589	0.0013724	0.0635244	0.0755381	0.0212574	0.0234854	0.103359	0.0185234	0.0264755	0.120483	0.0272757	0.0431777	0.0850739	0.0423225	0.0127547	0.0622728	0.0724532	-0.0116619	0.0523217	0.0536563
fBpby644	f	Southern British	0.185887	0.11345	-0.141193	-0.185887	0.11345	-0.141193	0.179593	-0.106781	0.00825073	-0.179593	-0.106781	0.00825073	0	-0.292803	-0.151567	0	-0.240377	0.0434856	0.20548	-0.0726578	-0.0328239	0.167884	-0.0613924	0.0511775	0.131655	-0.00454648	0.0494401	0.158146	-0.0134088	0.073897	0.0638514	0.0226407	0.0212464	0.104771	0.0179141	0.0183453	0.115607	0.0338502	0.0439705	0.0790506	0.0452616	0.00315885	0.0582116	0.0943897	-0.0137845	0.0466119	0.068066
mBpby650	m	Southern British	0.195204	0.0839585	-0.155932	-0.195204	0.0839585	-0.155932	0.177705	-0.121273	-0.01029	-0.177705	-0.121273	-0.01029	0	-0.269602	-0.12851	0	-0.235593	0.0257947	0.202811	-0.0790726	-0.0315349	0.170946	-0.0643134	0.0401739	0.14099	-0.00900865	0.0452524	0.16071	-0.00635974	0.0702886	0.0747948	0.0232288	0.0209381	0.10665	0.0200695	0.0264416	0.117309	0.03274	0.0451561	0.0856956	0.0524155	0.00967394	0.0563907	0.0877379	-8.48761e-05	0.0671557	0.0674207
fBpby654	f	Southern British	0.190159	0.102658	-0.161441	-0.190159	0.102658	-0.161441	0.164582	-0.120071	0.00599945	-0.164582	-0.120071	0.00599945	0	-0.276634	-0.158295	0	-0.232075	0.0257685	0.19744	-0.0613458	-0.0200634	0.164855	-0.0620483	0.0552048	0.14289	-0.00928344	0.0492141	0.158036	0.00619319	0.07847	0.0781799	0.0167562	0.0248099	0.110999	0.0177773	0.026397	0.127231	0.0270877	0.0360452	0.0871067	0.0372209	0.0119878	0.0547551	0.0669709	-0.00494111	0.0616769	0.0596657
mBpby658	m	Southern British	0.193539	0.123642	-0.133005	-0.193539	0.123642	-0.133005	0.185765	-0.131859	-0.0149413	-0.185765	-0.131859	-0.0149413	0	-0.279933	-0.135636	0	-0.212735	0.0530682	0.215818	-0.0859445	-0.0401454	0.154377	-0.0692208	0.0698642	0.129486	-0.0130255	0.0515433	0.155912	-0.00391938	0.0900205	0.064304	0.0266355	0.0236942	0.0975248	0.0247907	0.023575	0.111685	0.0317836	0.0322449	0.0708259	0.0436986	-0.00807134	0.048846	0.0869056	-0.0203559	0.0464612	0.0569229
fBpby679	f	Southern British	0.1981	0.105542	-0.139282	-0.1981	0.105542	-0.139282	0.181431	-0.0980129	0.00169223	-0.181431	-0.0980129	0.00169223	0	-0.268756	-0.151863	0	-0.230755	0.0332873	0.203501	-0.059048	-0.0206491	0.159539	-0.0537924	0.0592243	0.135848	2.42698e-05	0.0404238	0.162508	0.00546887	0.0851686	0.0904402	0.000962937	0.0052643	0.116178	0.00734504	0.0281231	0.118968	0.0281476	0.0348483	0.0881186	0.0271095	0.00496733	0.0524271	0.0472805	-0.0253498	0.0811576	0.0555726
fBpby684	f	Southern British	0.192952	0.103012	-0.119008	-0.192952	0.103012	-0.119008	0.16755	-0.128451	-0.00433557	-0.16755	-0.128451	-0.00433557	0	-0.300824	-0.13053	0	-0.247314	0.0352363	0.198314	-0.0666614	-0.0283176	0.169136	-0.0539914	0.0391397	0.134971	-0.00237392	0.042885	0.16324	-0.000735842	0.0647513	0.0840892	0.0129002	0.0204878	0.108242	0.018003	0.025394	0.122493	0.0327287	0.0454701	0.0795583	0.0378176	0.00849683	0.0622024	0.0796857	-0.0111283	0.0450246	0.0669719
fBpby707	f	Southern British	0.186686	0.113716	-0.145026	-0.186686	0.113716	-0.145026	0.183126	-0.123271	0.00801148	-0.183126	-0.123271	0.00801148	0	-0.29284	-0.150257	0	-0.268266	0.0267726	0.21023	-0.0543181	-0.0209294	0.169101	-0.0415372	0.0584516	0.14051	-0.000649209	0.047375	0.157558	-0.00340955	0.0716951	0.0695619	0.0202291	0.0216647	0.100554	0.0200359	0.021123	0.114056	0.0305359	0.0406506	0.084412	0.0385775	0.00386367	0.0598784	0.0572785	-0.00627158	0.0636781	0.057723
fBpby1004	f	Southern British	0.194264	0.0903908	-0.149858	-0.194264	0.0903908	-0.149858	0.169696	-0.126803	0.00286976	-0.169696	-0.126803	0.00286976	0	-0.279863	-0.149408	0	-0.239526	0.0296792	0.208583	-0.0616801	-0.0335714	0.166724	-0.0619576	0.0398673	0.13505	-0.0041347	0.0425871	0.155661	0.00540765	0.071617	0.0686208	0.0192445	0.0272079	0.102279	0.0163603	0.0314204	0.119792	0.0339768	0.0383463	0.0840049	0.045758	0.00568232	0.0587349	0.0808892	-0.0127737	0.0472759	0.057629
fBpby1022	f	Southern British	0.188219	0.128195	-0.122462	-0.188219	0.128195	-0.122462	0.181122	-0.123236	0.00967513	-0.181122	-0.123236	0.00967513	0	-0.284595	-0.140546	0	-0.196542	0.0553323	0.222604	-0.058205	-0.0214018	0.165235	-0.0626409	0.0562419	0.138269	-0.00967824	0.0482288	0.15327	-0.0197275	0.0737784	0.07502	0.0155537	0.00617538	0.112587	0.0131715	0.0126929	0.123505	0.0226582	0.0404799	0.086508	0.0435515	-0.00334945	0.0543768	0.0758361	-0.0238887	0.0537579	0.0533641
fBpby1030	f	Southern British	0.175951	0.136989	-0.160283	-0.175951	0.136989	-0.160283	0.190378	-0.121571	-0.0106545	-0.190378	-0.121571	-0.0106545	0	-0.3057	-0.137284	0	-0.232557	0.0341075	0.206441	-0.0656905	-0.0125386	0.15592	-0.0551002	0.0635357	0.137584	-0.00515582	0.0458275	0.159093	-0.00322342	0.0838527	0.0639201	0.0145359	0.0156202	0.101482	0.00884946	0.0148623	0.117426	0.0276622	0.0400534	0.0719407	0.0450568	0.00296297	0.054204	0.0786683	-0.00646264	0.045713	0.0578727
fBpby1095	f	Southern British	0.182709	0.126798	-0.143253	-0.182709	0.126798	-0.143253	0.173895	-0.121102	-0.00232055	-0.173895	-0.121102	-0.00232055	0	-0.292465	-0.118581	0	-0.235877	0.0326677	0.20172	-0.0835406	-0.0389003	0.166649	-0.0533318	0.0474038	0.138454	-0.00479476	0.0426745	0.162211	-0.000715761	0.0669937	0.0713018	0.0175842	0.0257878	0.108956	0.0167301	0.0244005	0.127325	0.0302957	0.0421607	0.0829077	0.0462611	0.00861648	0.0566529	0.0790219	-0.0060475	0.0467288	0.0517308
mBpby1225	m	Southern British	0.179165	0.103284	-0.153945	-0.179165	0.103284	-0.153945	0.17152	-0.11457	0.0035901	-0.17152	-0.11457	0.0035901	0	-0.296372	-0.169	0	-0.230633	0.0477851	0.203039	-0.0542427	-0.0255699	0.171519	-0.0570628	0.0520131	0.143804	-0.00538269	0.0462127	0.162899	0.0102305	0.0681754	0.0776101	0.0129638	0.0216242	0.110868	0.0147056	0.0201874	0.122686	0.026506	0.0422803	0.088807	0.0406901	0.0051245	0.0573118	0.0790352	-0.00159833	0.049203	0.0542393
mBiiroAc	m	Scottish and Irish	0.177581	0.11152	-0.133062	-0.177581	0.11152	-0.133062	0.180539	-0.1243	-0.00754743	-0.180539	-0.1243	-0.00754743	0	-0.263361	-0.130617	0	-0.225504	0.051502	0.207407	-0.0602229	-0.017411	0.183275	-0.0622855	0.0332072	0.146915	-0.00106221	0.0390948	0.167137	0.00473957	0.0643573	0.0753794	0.0200672	0.0212943	0.118995	0.0185983	0.0289473	0.127306	0.0325788	0.044777	0.0836209	0.0435491	0.00320506	0.0566797	0.0640478	-0.00533519	0.050303	0.0442824
fBiiro2904	f	Scottish and Irish	0.186739	0.103711	-0.145781	-0.186739	0.103711	-0.145781	0.175801	-0.133435	0.00135159	-0.175801	-0.133435	0.00135159	0	-0.287375	-0.160065	0	-0.23559	0.0447807	0.206887	-0.0670431	-0.0267267	0.169334	-0.0656224	0.0480092	0.137141	-0.00325768	0.0432364	0.162098	0.0106175	0.0742475	0.0677473	0.021995	0.02367	0.112803	0.0140129	0.0214336	0.116642	0.0311019	0.0396056	0.0764909	0.0451821	0.0057665	0.0544566	0.0761179	-0.00441255	0.0454493	0.0541368
fBiiro2337	f	Scottish and Irish	0.18031	0.106055	-0.138686	-0.18031	0.106055	-0.138686	0.180149	-0.134869	-0.0137756	-0.180149	-0.134869	-0.0137756	0	-0.283502	-0.142812	0	-0.223914	0.050553	0.209065	-0.0843883	-0.0385486	0.171915	-0.0470813	0.0512521	0.133265	0.00396503	0.0388456	0.16889	-0.000399298	0.0719368	0.0736719	0.0200387	0.0184854	0.113382	0.0185839	0.0248682	0.124091	0.0330599	0.0398281	0.0847133	0.04609	0.0114502	0.0634687	0.0769333	-0.00364437	0.0598023	0.054448
fBiiroAi	f	Scottish and Irish	0.180332	0.115634	-0.151407	-0.180332	0.115634	-0.151407	0.176305	-0.124641	-0.0065027	-0.176305	-0.124641	-0.0065027	0	-0.274013	-0.154899	0	-0.207806	0.0546239	0.204964	-0.065061	-0.0274095	0.158217	-0.0540301	0.061925	0.135073	-0.000834956	0.0386372	0.15942	0.00486341	0.0744318	0.0741895	0.013511	0.0206027	0.115935	0.00975506	0.0200756	0.12998	0.0262106	0.0326057	0.0882865	0.0391082	0.00865577	0.0682168	0.0658621	-0.00276229	0.051614	0.0503168
mBiiroB385	m	Scottish and Irish	0.186607	0.116952	-0.129802	-0.186607	0.116952	-0.129802	0.182422	-0.133065	-0.00280014	-0.182422	-0.133065	-0.00280014	0	-0.288165	-0.158867	0	-0.239032	0.0358988	0.196604	-0.0621022	-0.00374143	0.158783	-0.0458129	0.0614803	0.133508	0.00386789	0.0419553	0.160059	0.0089185	0.0723883	0.0735334	-0.000823435	0.022769	0.107643	0.0102206	0.0196544	0.127209	0.0277443	0.0401375	0.0775065	0.0425511	0.00265049	0.0623336	0.0722137	-0.015469	0.0478989	0.0535703
fBiiroCH	f	Scottish and Irish	0.183389	0.0835898	-0.162747	-0.183389	0.0835898	-0.162747	0.165913	-0.135601	-0.0122539	-0.165913	-0.135601	-0.0122539	0	-0.286052	-0.183779	0	-0.208595	0.0424929	0.197393	-0.0726185	-0.031456	0.160468	-0.0425	0.0612371	0.143415	0.003414	0.0465767	0.168364	0.00626584	0.064759	0.0753501	0.0111567	0.0268589	0.111201	0.0175408	0.0329374	0.128471	0.0321234	0.0430439	0.0851585	0.0439705	0.0165084	0.0601789	0.0708554	-0.00102312	0.0481673	0.0458913
mBiiroGt	m	Scottish and Irish	0.172522	0.102277	-0.148482	-0.172522	0.102277	-0.148482	0.176599	-0.123569	-0.00238427	-0.176599	-0.123569	-0.00238427	0	-0.274554	-0.148634	0	-0.249395	0.0332918	0.200297	-0.0593481	-0.0273164	0.169946	-0.0570254	0.0506213	0.143367	0.00459643	0.0461159	0.163559	0.0091955	0.0753358	0.0754243	0.0133247	0.0329462	0.109855	0.0164615	0.0294356	0.130823	0.0292791	0.0368227	0.0821255	0.0416022	0.0136198	0.0541773	0.0723876	-0.00963047	0.0427823	0.0445051
mBiiro966	m	Scottish and Irish	0.183859	0.120126	-0.139256	-0.183859	0.120126	-0.139256	0.178207	-0.120624	0.0123751	-0.178207	-0.120624	0.0123751	0	-0.268579	-0.136162	0	-0.247498	0.0326643	0.201844	-0.0673287	-0.0236883	0.170552	-0.06326	0.0532784	0.137581	-0.00385941	0.0417152	0.160039	-0.000173378	0.0762733	0.0815881	0.012206	0.0282269	0.116919	0.0114028	0.023362	0.120376	0.0367279	0.0374222	0.079159	0.0443528	0.00460962	0.0552069	0.0810333	-0.00968974	0.049192	0.0562516
fBiiro972	f	Scottish and Irish	0.174718	0.125296	-0.150888	-0.174718	0.125296	-0.150888	0.180237	-0.126538	-0.00402201	-0.180237	-0.126538	-0.00402201	0	-0.275629	-0.155769	0	-0.238542	0.0399655	0.198533	-0.0838137	-0.0150093	0.155101	-0.04588	0.0709855	0.131	0.00534579	0.0423653	0.162492	-0.000587744	0.0758497	0.0657644	0.0168726	0.0195507	0.110289	0.0168289	0.0226525	0.125846	0.0250815	0.0403676	0.0715861	0.0445395	0.00125628	0.0539889	0.0812324	-0.00557105	0.0462504	0.0575807
fBiiro977	f	Scottish and Irish	0.169592	0.132454	-0.144912	-0.169592	0.132454	-0.144912	0.17818	-0.118979	-0.00414284	-0.17818	-0.118979	-0.00414284	0	-0.284842	-0.113404	0	-0.23303	0.0340405	0.203	-0.0665886	-0.02529	0.17215	-0.0599921	0.0382976	0.141556	-0.00610452	0.0439651	0.166681	-0.00202346	0.0722428	0.0760629	0.0226737	0.0326835	0.112499	0.018392	0.022607	0.120766	0.0286953	0.0468255	0.0840232	0.0468581	0.0115276	0.0652055	0.0701137	-0.0027131	0.0470915	0.0555372
mBiiro986	m	Scottish and Irish	0.189458	0.0941706	-0.153663	-0.189458	0.0941706	-0.153663	0.168679	-0.12015	0.00407343	-0.168679	-0.12015	0.00407343	0	-0.261882	-0.139784	0	-0.227336	0.0230052	0.200379	-0.0776669	-0.0349277	0.170511	-0.0676335	0.0415557	0.134746	0.000509147	0.0410184	0.157499	0.00678253	0.078382	0.0696555	0.016483	0.0226115	0.112656	0.0142763	0.0231758	0.125961	0.0330365	0.0412873	0.0887409	0.0483386	0.00892213	0.0653142	0.0806572	-0.00998008	0.0460428	0.0547239
fBiiro2257	f	Scottish and Irish	0.185414	0.0994527	-0.152413	-0.185414	0.0994527	-0.152413	0.185308	-0.128844	-0.00873358	-0.185308	-0.128844	-0.00873358	0	-0.289012	-0.141251	0	-0.246767	0.0296444	0.203186	-0.0854328	-0.0244831	0.162565	-0.0622869	0.0437726	0.140158	-0.00727034	0.0470176	0.160848	-0.00159296	0.0683561	0.0616552	0.0247902	0.0177425	0.105674	0.014597	0.0311275	0.110487	0.0379714	0.0414876	0.0692436	0.057071	0.00799366	0.0482071	0.0877669	-0.00357845	0.0451757	0.0598561
fBmdc64	f	Southern British	0.181419	0.103569	-0.152303	-0.181419	0.103569	-0.152303	0.177036	-0.125147	-0.0115519	-0.177036	-0.125147	-0.0115519	0	-0.289744	-0.142421	0	-0.226912	0.025314	0.203964	-0.060778	-0.0285118	0.167088	-0.0451312	0.0511952	0.136646	0.00488519	0.0453152	0.155357	0.00768429	0.0697745	0.0738357	0.0102068	0.034295	0.114921	0.0134493	0.0340516	0.123391	0.0285245	0.0340971	0.0817719	0.0356602	0.0217752	0.0568937	0.0782507	-0.00559201	0.0453494	0.0510801
mBmdc69	m	Southern British	0.194666	0.0980582	-0.145295	-0.194666	0.0980582	-0.145295	0.175303	-0.124398	-0.00605691	-0.175303	-0.124398	-0.00605691	0	-0.275073	-0.147049	0	-0.213625	0.0363563	0.20065	-0.0806586	-0.0379404	0.160686	-0.0550048	0.0529743	0.13964	-0.00688059	0.0453969	0.159802	0.00146359	0.0731522	0.078546	0.0194862	0.0220078	0.113153	0.0156179	0.0407021	0.125182	0.029845	0.043078	0.0777477	0.0448018	0.00374386	0.0549452	0.079331	-0.00940756	0.053275	0.051553
fBmdc78	f	Southern British	0.17677	0.129383	-0.16587	-0.17677	0.129383	-0.16587	0.177521	-0.127877	0.00940796	-0.177521	-0.127877	0.00940796	0	-0.295351	-0.148666	0	-0.245987	0.0372463	0.19651	-0.052496	-0.0187191	0.167145	-0.0580316	0.0522262	0.1286	-0.0060605	0.0451523	0.153035	0.00563679	0.0782549	0.0739775	0.0046348	0.0141989	0.115025	0.00985753	0.0210231	0.118482	0.0267256	0.038011	0.0756337	0.041477	0.0146204	0.0481353	0.081463	-0.00160871	0.0386773	0.0474398
mBmdc80	m	Southern British	0.178358	0.112392	-0.160677	-0.178358	0.112392	-0.160677	0.176669	-0.126062	0.00119279	-0.176669	-0.126062	0.00119279	0	-0.289841	-0.175379	0	-0.236917	0.03848	0.198465	-0.0790646	-0.0157928	0.163434	-0.0465696	0.0548796	0.131026	0.00461535	0.0463729	0.161737	0.0110818	0.0749405	0.0684073	0.0158661	0.022816	0.103635	0.0124357	0.0262673	0.109516	0.0312607	0.0328866	0.0840046	0.0434235	0.0103989	0.055822	0.078477	-0.00512523	0.0456482	0.0544877
mBmdc92	m	Southern British	0.185939	0.0939317	-0.149936	-0.185939	0.0939317	-0.149936	0.179696	-0.108777	-0.00727618	-0.179696	-0.108777	-0.00727618	0	-0.278691	-0.13695	0	-0.231463	0.0407221	0.198967	-0.0711575	-0.0432936	0.167088	-0.062228	0.0410079	0.139555	-0.00106297	0.045744	0.157003	0.00205048	0.0754324	0.0788014	0.0158564	0.0330206	0.116421	0.0100962	0.026532	0.122815	0.0301886	0.0340874	0.0891917	0.0396124	0.00975288	0.0624695	0.0794604	0.000519136	0.0508377	0.0523829
mBmdc94	m	Southern British	0.188815	0.120164	-0.15152	-0.188815	0.120164	-0.15152	0.173782	-0.127374	-0.00905527	-0.173782	-0.127374	-0.00905527	0	-0.274178	-0.138707	0	-0.209385	0.0462066	0.199631	-0.0792767	-0.0280631	0.162164	-0.0568569	0.0508994	0.138291	-0.00706672	0.0482057	0.155935	0.0031806	0.0934044	0.0708499	0.0176799	0.0132007	0.114381	0.0116893	0.0105772	0.124254	0.0266094	0.0357301	0.0831673	0.0442097	0.0020604	0.0603672	0.0752017	-0.0105999	0.0546808	0.0479284
mBmdc95	m	Southern British	0.199048	0.0958824	-0.143268	-0.199048	0.0958824	-0.143268	0.175324	-0.116626	-0.0133987	-0.175324	-0.116626	-0.0133987	0	-0.27778	-0.151222	0	-0.224439	0.0431562	0.199779	-0.0390813	-0.0170329	0.167803	-0.0526878	0.0581053	0.136745	0.000474984	0.0418965	0.155569	-0.000253224	0.0850642	0.0718165	0.017702	0.0145152	0.108661	0.0135105	0.0185029	0.123382	0.0228916	0.0408922	0.0870303	0.0439834	0.00510453	0.0677211	0.0667088	-0.00690902	0.0505282	0.05002
mBmdc97	m	Southern British	0.200479	0.0916923	-0.14779	-0.200479	0.0916923	-0.14779	0.178725	-0.126539	-0.000998719	-0.178725	-0.126539	-0.000998719	0	-0.257752	-0.163823	0	-0.218671	0.0480601	0.205152	-0.051991	-0.0188451	0.169578	-0.0542903	0.0511393	0.139203	-0.000448002	0.0416318	0.164645	0.00187231	0.0722324	0.0813222	0.0133379	0.0309846	0.110508	0.0102595	0.028692	0.120983	0.0249665	0.0405051	0.0821521	0.0454481	0.0093826	0.0607318	0.0715554	-0.00791591	0.0518494	0.0476183
mBmdc98	m	Southern British	0.174573	0.109257	-0.147348	-0.174573	0.109257	-0.147348	0.169864	-0.127782	-0.000319313	-0.169864	-0.127782	-0.000319313	0	-0.288215	-0.144267	0	-0.252638	0.0465397	0.199641	-0.0585965	-0.0334928	0.167309	-0.062595	0.0486405	0.143133	0.00289949	0.0425641	0.163474	0.00152847	0.0697318	0.0640429	0.0242706	0.0277448	0.102874	0.0150361	0.0208597	0.122495	0.0267629	0.0408205	0.0818991	0.049561	0.0112681	0.051453	0.0822434	-0.00193355	0.0510297	0.0480349
fBmdc101	f	Southern British	0.179405	0.110119	-0.147783	-0.179405	0.110119	-0.147783	0.179944	-0.122049	-0.00991703	-0.179944	-0.122049	-0.00991703	0	-0.290148	-0.152119	0	-0.225875	0.0506498	0.200873	-0.0706502	-0.0322276	0.155541	-0.0558213	0.057435	0.126816	-0.0101549	0.0539746	0.152262	0.00460608	0.068885	0.0761049	0.0206527	0.0206045	0.10769	0.0184778	0.0226748	0.124635	0.0296273	0.0387695	0.0823538	0.0465999	0.0134542	0.0571629	0.078712	-0.0022338	0.0450025	0.0553986
mBmdc105	m	Southern British	0.181349	0.088493	-0.143475	-0.181349	0.088493	-0.143475	0.165209	-0.113349	-0.00559935	-0.165209	-0.113349	-0.00559935	0	-0.265179	-0.118128	0	-0.237592	0.0224999	0.202473	-0.0721919	-0.0440108	0.184241	-0.0524547	0.0331871	0.142076	0.00318672	0.0439476	0.175304	0.00413624	0.0702151	0.0769178	0.0195181	0.0281114	0.110534	0.0155954	0.0337743	0.128765	0.0281852	0.0367254	0.0928868	0.0422532	0.0124779	0.0647862	0.0756725	-0.00466789	0.0604277	0.0597962
mBmdc110	m	Southern British	0.180827	0.122519	-0.152268	-0.180827	0.122519	-0.152268	0.177798	-0.124817	-0.0014462	-0.177798	-0.124817	-0.0014462	0	-0.300072	-0.163524	0	-0.234515	0.0427433	0.20875	-0.0671347	-0.0251005	0.16112	-0.0536489	0.061127	0.131875	0.0107514	0.0440387	0.155621	0.0121435	0.081293	0.0748535	0.00586929	0.0213571	0.111327	0.00986076	0.021758	0.113293	0.0313261	0.0353394	0.084058	0.0402046	0.00802285	0.0575397	0.0673323	-0.00819955	0.0482298	0.042195
mBmdc112	m	Southern British	0.18488	0.118973	-0.143467	-0.18488	0.118973	-0.143467	0.165495	-0.128598	0.0096122	-0.165495	-0.128598	0.0096122	0	-0.283412	-0.158882	0	-0.237683	0.0510533	0.196871	-0.0586402	-0.0214532	0.167662	-0.061998	0.0433272	0.138721	0.00104541	0.0397921	0.154588	0.00887492	0.067505	0.0803957	0.0179325	0.0249651	0.119212	0.0140864	0.0255161	0.116767	0.0334787	0.0382608	0.087	0.0418772	0.00322532	0.0663185	0.06552	-0.0160861	0.0583919	0.0495968
fBmdc61	f	Southern British	0.193094	0.104474	-0.168157	-0.193094	0.104474	-0.168157	0.172304	-0.120225	-0.00436294	-0.172304	-0.120225	-0.00436294	0	-0.281097	-0.165184	0	-0.20719	0.046015	0.206206	-0.0599389	-0.0388277	0.16322	-0.0549931	0.0620543	0.138157	-0.00153693	0.0551198	0.157812	0.00540269	0.0820925	0.0734251	0.0125859	0.0190885	0.108305	0.0109601	0.0194145	0.124106	0.0247996	0.0417261	0.083704	0.0482528	0.00787168	0.0541073	0.0803399	-0.0050406	0.0460804	0.0499512
fBmdc62	f	Southern British	0.173499	0.11516	-0.156296	-0.173499	0.11516	-0.156296	0.160854	-0.129552	8.59491e-05	-0.160854	-0.129552	8.59491e-05	0	-0.271565	-0.128797	0	-0.23359	0.038174	0.202872	-0.0678759	-0.0318068	0.17024	-0.0395497	0.047569	0.148635	0.00121408	0.038549	0.169576	0.00281259	0.0484383	0.067568	0.0160531	0.0186465	0.110117	0.0122726	0.0236198	0.130548	0.0224246	0.0438797	0.0870232	0.0409801	0.0191723	0.0566578	0.0741413	0.00281953	0.0454634	0.0531691
mBmdc71	m	Southern British	0.178448	0.116282	-0.149985	-0.178448	0.116282	-0.149985	0.174277	-0.118185	-0.00314873	-0.174277	-0.118185	-0.00314873	0	-0.291095	-0.144657	0	-0.235165	0.0455788	0.193921	-0.0655302	-0.0391026	0.158773	-0.0546186	0.0570288	0.137271	0.00267175	0.0424694	0.161442	-0.00607728	0.0704856	0.0749642	0.0206949	0.0347818	0.105809	0.0157653	0.0290735	0.118449	0.0285283	0.0437773	0.0825456	0.0476891	0.00483786	0.0636491	0.0744708	-0.00811758	0.0538572	0.0497798
fBmdc115	f	Southern British	0.178885	0.0995802	-0.144384	-0.178885	0.0995802	-0.144384	0.170004	-0.125892	-0.00511557	-0.170004	-0.125892	-0.00511557	0	-0.278653	-0.156556	0	-0.230749	0.0426885	0.195893	-0.081428	-0.0284076	0.17383	-0.0459613	0.0452855	0.144937	0.000254579	0.0424875	0.167219	0.00925164	0.0597793	0.0870073	0.0202284	0.0340498	0.116926	0.016986	0.0268546	0.12865	0.0294439	0.0459412	0.0835419	0.0427512	0.0153994	0.0546247	0.0797259	-0.00132675	0.0444408	0.0524409
fBiirbf	f	Scottish and Irish	0.186605	0.114026	-0.138175	-0.186605	0.114026	-0.138175	0.181288	-0.119633	0.00641527	-0.181288	-0.119633	0.00641527	0	-0.287462	-0.147095	0	-0.240752	0.0317796	0.203357	-0.0644383	-0.0236243	0.161385	-0.0532248	0.0609424	0.130855	-0.00172618	0.0381277	0.15701	0.00142287	0.0736214	0.0755112	0.0107537	0.023113	0.112001	0.00861007	0.0178182	0.119477	0.032307	0.0339834	0.0841512	0.0436635	0.00739266	0.0730282	0.0648452	-0.00791054	0.0512415	0.0539222
fBiirCH15	f	Scottish and Irish	0.182278	0.103938	-0.134804	-0.182278	0.103938	-0.134804	0.185829	-0.131567	-0.00538355	-0.185829	-0.131567	-0.00538355	0	-0.281984	-0.154381	0	-0.214106	0.0437494	0.20285	-0.0702326	-0.0242812	0.150951	-0.0507688	0.0588084	0.121281	-0.0018204	0.043088	0.158262	-0.012477	0.0736583	0.0693661	0.0220517	0.0148397	0.111494	0.0246561	0.0186665	0.120762	0.032118	0.041087	0.0824853	0.0529954	0.00413358	0.0684532	0.0731976	-0.00893204	0.0546979	0.0503693
mBiir973	m	Scottish and Irish	0.189136	0.110562	-0.12964	-0.189136	0.110562	-0.12964	0.166231	-0.126614	0.00316035	-0.166231	-0.126614	0.00316035	0	-0.291772	-0.141581	0	-0.250904	0.034863	0.197786	-0.0668423	-0.0215774	0.160904	-0.0615865	0.0482845	0.139443	-0.000346024	0.0376906	0.164508	-0.000750174	0.0695976	0.0720796	0.0243132	0.0194208	0.108608	0.0228587	0.0241915	0.124456	0.0284626	0.0418465	0.0770493	0.0559649	0.00503203	0.060512	0.0808344	-0.00394993	0.0442008	0.0587012
mBmdc63	m	Southern British	0.182361	0.091011	-0.155603	-0.182361	0.091011	-0.155603	0.170503	-0.121978	-0.00762039	-0.170503	-0.121978	-0.00762039	0	-0.280438	-0.156806	0	-0.224937	0.0208491	0.203017	-0.0742761	-0.023913	0.165989	-0.0575531	0.057544	0.139353	0.0011888	0.0434874	0.16368	0.0105727	0.0767744	0.0736416	0.020845	0.0256059	0.112432	0.0169193	0.0206974	0.126976	0.0264029	0.04287	0.0801059	0.0450752	0.0137653	0.0510937	0.0791919	-0.00415375	0.0451864	0.057521
mBmdc74	m	Southern British	0.198686	0.0983082	-0.156762	-0.198686	0.0983082	-0.156762	0.167316	-0.125826	-0.00573047	-0.167316	-0.125826	-0.00573047	0	-0.277271	-0.155231	0	-0.241419	0.0275402	0.196606	-0.0635208	-0.0214264	0.160907	-0.0423269	0.0582607	0.138447	0.00236139	0.0386674	0.160448	0.00764893	0.0734974	0.0789685	0.0151773	0.0384933	0.117772	0.010488	0.0201868	0.126586	0.0295161	0.0333618	0.0794794	0.0442026	0.0131078	0.0513361	0.0736505	0.000492512	0.0466631	0.0504837
fBmdc75	f	Southern British	0.188954	0.133956	-0.159183	-0.188954	0.133956	-0.159183	0.184934	-0.119083	-0.00607613	-0.184934	-0.119083	-0.00607613	0	-0.289966	-0.135882	0	-0.221695	0.0454645	0.2089	-0.0853928	-0.0363076	0.163663	-0.0535688	0.0572988	0.13393	-0.00130575	0.0438429	0.157797	-0.002784	0.0698659	0.0728193	0.0162264	0.0290062	0.0980092	0.00977095	0.0196541	0.11659	0.0306004	0.0347958	0.0786283	0.0444215	0.0072315	0.061876	0.0803135	-0.0101639	0.0449961	0.066996
fBmdc76	f	Southern British	0.192937	0.0989597	-0.143435	-0.192937	0.0989597	-0.143435	0.183308	-0.104372	-0.00514429	-0.183308	-0.104372	-0.00514429	0	-0.271271	-0.158939	0	-0.213823	0.056553	0.196337	-0.0753335	-0.0244235	0.167981	-0.056986	0.0471426	0.140841	0.000772098	0.042127	0.167748	-0.00983529	0.0722559	0.0779246	0.015059	0.0310569	0.116533	0.0168081	0.0264582	0.132629	0.0284427	0.0359638	0.0864309	0.0409335	0.0119667	0.070972	0.0685435	-0.0154408	0.0516366	0.0500194
fBmdc77	f	Southern British	0.203075	0.0920131	-0.122014	-0.203075	0.0920131	-0.122014	0.171262	-0.118284	0.000834285	-0.171262	-0.118284	0.000834285	0	-0.282801	-0.143151	0	-0.244442	0.019712	0.200874	-0.0803436	-0.0245226	0.151063	-0.0620128	0.0551844	0.127793	-0.00307522	0.0422422	0.155048	0.00173892	0.0821811	0.070439	0.0205445	0.0172849	0.109616	0.0131925	0.0159956	0.117781	0.0328459	0.040475	0.0907472	0.0469346	0.00307498	0.0597079	0.0806887	-0.0113372	0.0520403	0.0581994
fBmdc79	f	Southern British	0.190639	0.123483	-0.141281	-0.190639	0.123483	-0.141281	0.17152	-0.119573	0.0114133	-0.17152	-0.119573	0.0114133	0	-0.292525	-0.159226	0	-0.244582	0.0527459	0.210574	-0.0529988	-0.032793	0.164211	-0.0475847	0.0550793	0.134295	-0.00295244	0.0497031	0.152007	0.0102056	0.080562	0.0913176	0.0025077	0.0103139	0.117552	0.007584	0.0189561	0.127933	0.0252614	0.0305037	0.0826235	0.041355	0.00630951	0.0500303	0.0618684	-0.0132433	0.0440838	0.0403568
mBmdc90	m	Southern British	0.191295	0.116604	-0.135615	-0.191295	0.116604	-0.135615	0.175368	-0.131819	0.00495961	-0.175368	-0.131819	0.00495961	0	-0.29474	-0.130856	0	-0.252848	0.0262331	0.201614	-0.0643622	-0.0265056	0.152178	-0.0596376	0.0513688	0.134449	-0.00623485	0.0442208	0.160113	-0.00585919	0.0775376	0.0735514	0.0188937	0.0230747	0.106792	0.0161664	0.0268416	0.113762	0.0382669	0.0333686	0.0751161	0.0510154	0.0053159	0.0585254	0.0708541	-0.00973635	0.0468871	0.0582342
fBmdc99	f	Southern British	0.180418	0.103749	-0.147065	-0.180418	0.103749	-0.147065	0.183992	-0.124369	-0.00421547	-0.183992	-0.124369	-0.00421547	0	-0.281117	-0.154757	0	-0.255096	0.0157913	0.201326	-0.0815805	-0.0290163	0.163902	-0.0355054	0.0693145	0.132301	0.0077191	0.0400773	0.162876	0.0180068	0.0836402	0.0723385	0.0101546	0.025223	0.109962	0.00933252	0.0289121	0.12324	0.0294993	0.0277517	0.0803853	0.0382183	0.0143059	0.0615723	0.068269	-0.00462671	0.0502918	0.0424162
mBmdc102	m	Southern British	0.180138	0.101042	-0.144512	-0.180138	0.101042	-0.144512	0.181982	-0.122196	0.000614654	-0.181982	-0.122196	0.000614654	0	-0.289905	-0.167072	0	-0.2424	0.0370701	0.203924	-0.0599011	-0.0355587	0.16039	-0.0396681	0.0637894	0.135514	0.00201638	0.0432606	0.159116	0.00286278	0.0738112	0.0734149	0.0174966	0.028552	0.110713	0.0191058	0.0290648	0.128393	0.0330709	0.0433614	0.0796352	0.0469506	0.0119611	0.054967	0.0806394	-0.00384598	0.0490116	0.0525733
mBmdc104	m	Southern British	0.188172	0.108896	-0.151977	-0.188172	0.108896	-0.151977	0.176459	-0.118225	-0.0032476	-0.176459	-0.118225	-0.0032476	0	-0.295589	-0.151336	0	-0.246627	0.0245672	0.203362	-0.0630249	-0.0352493	0.15926	-0.042944	0.0632234	0.142492	0.00222141	0.0397622	0.165416	0.0120631	0.0709012	0.0761435	0.0193992	0.0372911	0.118293	0.0148436	0.0262065	0.126756	0.0325897	0.0281064	0.0854159	0.0357792	0.00392828	0.0584873	0.0557725	-0.0133262	0.0452805	0.0448796
fBmdc60	f	Southern British	0.192879	0.0933415	-0.150986	-0.192879	0.0933415	-0.150986	0.166011	-0.133134	-0.00678654	-0.166011	-0.133134	-0.00678654	0	-0.286067	-0.136559	0	-0.230363	0.0313321	0.198804	-0.074106	-0.0357329	0.169456	-0.0597871	0.0373685	0.134486	0.00464547	0.0434005	0.167301	0.00377896	0.0586457	0.07814	0.021858	0.0209597	0.109411	0.0240646	0.0316782	0.124571	0.0314014	0.0494844	0.0874895	0.0501702	0.020848	0.0644738	0.0756235	0.00371286	0.0515354	0.0548121
mBmdc70	m	Southern British	0.173378	0.129903	-0.1503	-0.173378	0.129903	-0.1503	0.174407	-0.126973	0.00137943	-0.174407	-0.126973	0.00137943	0	-0.293594	-0.144625	0	-0.224609	0.0455638	0.197982	-0.0647914	-0.0198223	0.159561	-0.067413	0.0482317	0.139394	-0.00267084	0.0453467	0.161157	0.00344523	0.0791477	0.0740661	0.0173733	0.0247014	0.112485	0.0114182	0.0180264	0.118456	0.0353008	0.0376534	0.085549	0.0446679	0.0093677	0.0555965	0.0760531	-0.0051356	0.0496623	0.0514113
fBmdc89	f	Southern British	0.186795	0.0848884	-0.149771	-0.186795	0.0848884	-0.149771	0.176982	-0.121853	-0.0071829	-0.176982	-0.121853	-0.0071829	0	-0.252179	-0.138827	0	-0.205548	0.0468278	0.200411	-0.0551288	-0.0288416	0.17413	-0.0674035	0.0330795	0.148081	0.00389012	0.0387178	0.166877	0.00330742	0.0642454	0.0915191	0.00588194	0.0242998	0.1198	0.0115003	0.0277375	0.125886	0.0384263	0.0409615	0.0889806	0.0424293	0.0163436	0.0689755	0.0720725	0.00283652	0.0567802	0.0540713
mBpby19	m	Southern British	0.196055	0.095124	-0.148762	-0.196055	0.095124	-0.148762	0.176695	-0.11835	0.00919546	-0.176695	-0.11835	0.00919546	0	-0.26638	-0.161497	0	-0.238516	0.0424	0.199286	-0.0431823	-0.0239007	0.15992	-0.0521021	0.0544836	0.135753	-0.00343432	0.0365412	0.158994	-0.00617811	0.0813006	0.0753381	0.018142	0.0183045	0.116002	0.014303	0.0184058	0.125775	0.0284519	0.0359521	0.0871019	0.0398353	0.00730663	0.0553721	0.0784213	-0.0115216	0.0453598	0.0568815
fBpby31	f	Southern British	0.18719	0.0977568	-0.143646	-0.18719	0.0977568	-0.143646	0.17624	-0.126479	-0.00560351	-0.17624	-0.126479	-0.00560351	0	-0.294699	-0.159713	0	-0.235634	0.0368565	0.202084	-0.0717841	-0.0234252	0.169641	-0.050363	0.0479192	0.139741	-0.00135705	0.0421776	0.158689	0.00444459	0.0658181	0.0690089	0.0217672	0.031826	0.104338	0.013329	0.0226407	0.125069	0.0339278	0.0416759	0.0773269	0.0475699	0.00730994	0.0562156	0.0775206	-0.0082041	0.0442006	0.0654146
fBpby103	f	Southern British	0.188663	0.104467	-0.138386	-0.188663	0.104467	-0.138386	0.179746	-0.122343	-0.0031283	-0.179746	-0.122343	-0.0031283	0	-0.300629	-0.149744	0	-0.23676	0.0427054	0.211537	-0.0640605	-0.0356965	0.164046	-0.0584983	0.0461595	0.135904	6.56761e-05	0.0402722	0.152414	0.00576176	0.0690861	0.0740697	0.0161729	0.0247278	0.111251	0.0187021	0.0271186	0.114868	0.0370888	0.0435331	0.0825566	0.0442031	0.0103005	0.052213	0.0747295	-0.00639263	0.047114	0.0434723
mBpby109	m	Southern British	0.187288	0.127625	-0.123611	-0.187288	0.127625	-0.123611	0.185061	-0.115848	-0.00149802	-0.185061	-0.115848	-0.00149802	0	-0.282185	-0.140658	0	-0.231958	0.0361743	0.212865	-0.0788758	-0.0147404	0.169302	-0.0547539	0.0603073	0.129277	0.000530827	0.0385497	0.151075	0.0120594	0.0844944	0.072146	0.0152835	0.0143222	0.108765	0.00969268	0.0101526	0.119762	0.0284155	0.0338177	0.0769935	0.0416879	-0.00182645	0.0556588	0.0693661	-0.0156647	0.0464471	0.0502057
mBpby113	m	Southern British	0.173178	0.107905	-0.140527	-0.173178	0.107905	-0.140527	0.170183	-0.133885	-0.0151099	-0.170183	-0.133885	-0.0151099	0	-0.282009	-0.137678	0	-0.219007	0.0473436	0.200825	-0.0779201	-0.0316054	0.168638	-0.0461245	0.055197	0.137647	-0.00443568	0.0405197	0.165738	0.000253621	0.0686425	0.081684	0.0165741	0.0276144	0.113142	0.013365	0.0240031	0.130086	0.0269871	0.037943	0.0832306	0.0456682	0.0114615	0.0586458	0.0782038	-0.00354938	0.0521562	0.05124
fBpby121	f	Southern British	0.206754	0.106158	-0.145461	-0.206754	0.106158	-0.145461	0.168266	-0.12187	-0.0035153	-0.168266	-0.12187	-0.0035153	0	-0.306523	-0.15764	0	-0.227277	0.0385683	0.198992	-0.082387	-0.0247103	0.153788	-0.0609761	0.0496657	0.132975	0.00119358	0.0407181	0.145888	-0.000702668	0.0764471	0.0784347	0.0258434	0.00645978	0.102583	0.0188544	0.0157159	0.115766	0.0284848	0.0418826	0.0788302	0.0477494	-0.00170727	0.0594329	0.0821649	-0.00856975	0.0507541	0.0643414
mBpby208	m	Southern British	0.186993	0.113972	-0.141199	-0.186993	0.113972	-0.141199	0.173153	-0.127727	-0.0187436	-0.173153	-0.127727	-0.0187436	0	-0.275819	-0.0965001	0	-0.238018	0.0257776	0.20958	-0.0640141	-0.0410549	0.164594	-0.0515229	0.055892	0.133185	-0.00332486	0.0410999	0.166323	0.00797646	0.078876	0.0715105	0.00548912	0.014116	0.111676	0.0072037	0.0202307	0.126888	0.0219435	0.0321138	0.0878777	0.0453489	0.00775809	0.0615184	0.0785768	-0.000884585	0.0510173	0.0487003
mBpby221	m	Southern British	0.185722	0.110403	-0.148717	-0.185722	0.110403	-0.148717	0.175689	-0.128645	-0.00955758	-0.175689	-0.128645	-0.00955758	0	-0.279937	-0.126402	0	-0.23164	0.0421955	0.201153	-0.0556722	-0.0387728	0.170613	-0.0530985	0.055536	0.139722	0.000936166	0.0314444	0.163401	0.00367123	0.0726777	0.0739533	0.0158529	0.0197049	0.117279	0.0121861	0.0237139	0.125777	0.0278711	0.0364521	0.0906525	0.0422035	0.0106167	0.0565781	0.0777946	0.00160155	0.0514524	0.0484154
mBpby247	m	Southern British	0.188066	0.12045	-0.128303	-0.188066	0.12045	-0.128303	0.179649	-0.125839	0.0130314	-0.179649	-0.125839	0.0130314	0	-0.274937	-0.131316	0	-0.248747	0.0481322	0.204007	-0.0553009	-0.037563	0.170456	-0.0560798	0.0485125	0.131589	-0.00585099	0.0387838	0.161622	-0.0041816	0.078212	0.0746052	0.0155684	0.0173223	0.10952	0.00989703	0.0186489	0.122804	0.0256738	0.0438147	0.0750826	0.0454189	0.00434988	0.0652477	0.072396	-0.0148209	0.0453879	0.0547483
mBpby277	m	Southern British	0.195828	0.109355	-0.13494	-0.195828	0.109355	-0.13494	0.166998	-0.115536	-0.00180579	-0.166998	-0.115536	-0.00180579	0	-0.284128	-0.130093	0	-0.223821	0.0309881	0.196968	-0.0788789	-0.0226446	0.156728	-0.0527712	0.0508687	0.140223	0.00287114	0.0421793	0.165748	-0.0108672	0.0678716	0.0945998	0.00443387	0.00920393	0.117162	0.0135945	0.012083	0.123799	0.0361347	0.0406443	0.0861067	0.0487388	0.00869699	0.0672063	0.0813703	-0.00667628	0.0532241	0.0600758
fBpby305	f	Southern British	0.176782	0.11199	-0.149903	-0.176782	0.11199	-0.149903	0.180586	-0.126391	-0.0130074	-0.180586	-0.126391	-0.0130074	0	-0.282936	-0.112723	0	-0.222794	0.02455	0.200403	-0.0646849	-0.0251176	0.174146	-0.0599568	0.0374604	0.140443	0.00318684	0.0400733	0.161133	-0.00140146	0.0777902	0.0767211	0.00854122	0.0307146	0.111386	0.0175708	0.0268227	0.131032	0.0261967	0.0379541	0.0864957	0.0464127	0.0144381	0.0679212	0.0717195	-0.00165015	0.0495421	0.0555588
fBpby385	f	Southern British	0.199835	0.0899289	-0.1409	-0.199835	0.0899289	-0.1409	0.177973	-0.115031	-0.000888442	-0.177973	-0.115031	-0.000888442	0	-0.285246	-0.154925	0	-0.213215	0.0442811	0.209366	-0.0706901	-0.0321509	0.171642	-0.0599028	0.0419558	0.137913	-0.00405943	0.0402068	0.165132	0.00597627	0.056209	0.0795959	0.0137598	0.0170808	0.111496	0.011245	0.0188176	0.116359	0.0350599	0.0485236	0.0816041	0.0422885	0.00375996	0.0643106	0.0723708	-0.00239967	0.0455729	0.0581837
fBpby515	f	Southern British	0.200322	0.0999341	-0.118566	-0.200322	0.0999341	-0.118566	0.179431	-0.117138	-0.00296569	-0.179431	-0.117138	-0.00296569	0	-0.286023	-0.116355	0	-0.251861	0.0208032	0.215413	-0.065475	-0.0387491	0.17276	-0.0452272	0.0437275	0.137059	0.00529155	0.0344843	0.158008	0.00658762	0.0660802	0.0872823	0.0150175	0.0103765	0.115901	0.0184568	0.0230428	0.121255	0.034024	0.033388	0.084748	0.0408046	0.00637375	0.0621355	0.0736357	-0.0109353	0.0513496	0.0464719
fBpbyhgr352	f	Southern British	0.192397	0.103857	-0.127765	-0.192397	0.103857	-0.127765	0.181271	-0.106215	-0.00130701	-0.181271	-0.106215	-0.00130701	0	-0.300898	-0.134543	0	-0.236191	0.0301075	0.201374	-0.0613336	-0.0191046	0.157895	-0.0571076	0.0527287	0.132962	-0.00446174	0.0393214	0.1605	-0.00915589	0.0472998	0.091278	0.016413	0.0296975	0.117288	0.0146547	0.0213657	0.114665	0.0386947	0.0180255	0.101282	0.042024	0.0185184	0.0630491	0.0795841	-0.00104028	0.057107	0.0504852
mBpbyhgr1347	m	Southern British	0.181104	0.107313	-0.13147	-0.181104	0.107313	-0.13147	0.184784	-0.126692	-0.00697277	-0.184784	-0.126692	-0.00697277	0	-0.272263	-0.143874	0	-0.237751	0.0411476	0.211047	-0.0784898	-0.0340146	0.163969	-0.0529029	0.0635624	0.131001	0.00547552	0.0356566	0.163605	0.0069979	0.0708816	0.0707128	0.0170158	0.0224295	0.110871	0.0146742	0.0278205	0.116851	0.0363963	0.0420666	0.0853385	0.0336181	0.00673231	0.0657902	0.0723071	-0.0105394	0.051684	0.0465188
fBpbyhgr1519	f	Southern British	0.172731	0.0965866	-0.134368	-0.172731	0.0965866	-0.134368	0.179606	-0.125042	-0.000109822	-0.179606	-0.125042	-0.000109822	0	-0.310173	-0.144641	0	-0.27777	0.0337938	0.204072	-0.0593077	-0.0309707	0.166896	-0.0523214	0.0454886	0.139018	0.000558767	0.0378128	0.159088	0.00137592	0.0550131	0.0837193	0.0241263	0.0250951	0.111108	0.0201531	0.0317129	0.131075	0.027386	0.0368802	0.0796913	0.046685	0.0194346	0.0621447	0.0791127	-0.00107825	0.0525349	0.0580811
mBpbyhgr1887	m	Southern British	0.178605	0.0933157	-0.136759	-0.178605	0.0933157	-0.136759	0.177365	-0.119546	-0.00513741	-0.177365	-0.119546	-0.00513741	0	-0.270697	-0.147647	0	-0.215029	0.0239671	0.208747	-0.0583881	-0.0289228	0.172757	-0.0398193	0.0637295	0.141983	0.0037175	0.0390457	0.16322	0.0150525	0.0774919	0.095152	-0.0059155	0.00839066	0.12363	0.00119866	0.0304084	0.128306	0.0319937	0.0386996	0.0953023	0.0331009	0.0146926	0.0709545	0.0600068	-0.000281638	0.0577599	0.0388989
mBpbyhgr1983	m	Southern British	0.195946	0.104401	-0.150814	-0.195946	0.104401	-0.150814	0.169981	-0.123438	-0.00687883	-0.169981	-0.123438	-0.00687883	0	-0.256155	-0.124773	0	-0.221061	0.0313327	0.207548	-0.0686845	-0.0276365	0.174512	-0.0683843	0.0426711	0.13862	0.00234226	0.0450081	0.16105	0.00634955	0.072278	0.0887992	0.00540051	0.0111743	0.120104	0.0172688	0.0293649	0.129451	0.0398756	0.0341985	0.0827468	0.0420786	0.00884737	0.0620957	0.0665896	-0.00398612	0.0594811	0.0416825
mBpbyhgr2045	m	Southern British	0.182812	0.0939519	-0.140828	-0.182812	0.0939519	-0.140828	0.186601	-0.107231	-0.00182624	-0.186601	-0.107231	-0.00182624	0	-0.284408	-0.145692	0	-0.233104	0.0461402	0.209003	-0.0589802	-0.0416579	0.176269	-0.0612866	0.0388974	0.133973	0.00303048	0.0443089	0.160677	0.0134232	0.0738525	0.0822886	0.00794179	0.00252095	0.114511	0.012688	0.0121488	0.122774	0.0341019	0.0492514	0.0838777	0.0412503	0.0101846	0.0618299	0.0703547	-0.00124598	0.0490783	0.0420713
mBiirph	m	Scottish and Irish	0.195815	0.0902288	-0.150597	-0.195815	0.0902288	-0.150597	0.172741	-0.127977	-0.0150868	-0.172741	-0.127977	-0.0150868	0	-0.272268	-0.166307	0	-0.223107	0.0375682	0.209375	-0.0671189	-0.0373456	0.156637	-0.0428019	0.070618	0.134986	-0.000551148	0.0409549	0.156768	0.010552	0.0885378	0.0723982	0.014004	0.020233	0.104702	0.0136215	0.0274446	0.113031	0.0382269	0.0422316	0.0813741	0.0462578	0.00621693	0.0562487	0.0797868	-0.0089753	0.0534	0.0517929
mBiirWB	m	Scottish and Irish	0.200498	0.0863831	-0.136553	-0.200498	0.0863831	-0.136553	0.172896	-0.122197	-0.00808126	-0.172896	-0.122197	-0.00808126	0	-0.273494	-0.151777	0	-0.248221	0.0315301	0.2049	-0.0696019	-0.0320585	0.158855	-0.0538006	0.0506624	0.13629	0.00540865	0.0491353	0.152863	0.00447752	0.086351	0.0797776	0.0160618	0.0165199	0.109428	0.0187903	0.0248066	0.114889	0.0355771	0.0394575	0.079499	0.0437179	0.0020929	0.0565164	0.0743211	-0.0106248	0.0432101	0.0461963
mBpmk30	m	Scottish and Irish	0.182736	0.101588	-0.151443	-0.182736	0.101588	-0.151443	0.170956	-0.130155	-0.00546605	-0.170956	-0.130155	-0.00546605	0	-0.297737	-0.16312	0	-0.237674	0.0457063	0.197295	-0.0676674	-0.0239589	0.160781	-0.0579348	0.0538172	0.141385	-0.00322737	0.0439024	0.165465	0.000771516	0.0769923	0.0712259	0.013604	0.0180017	0.0994902	0.0142695	0.0280224	0.119494	0.0278425	0.0483291	0.0675293	0.0489339	-0.00102635	0.0489466	0.0811355	-0.00459848	0.0548116	0.0724675
mBpmk31	m	Scottish and Irish	0.17938	0.113035	-0.137643	-0.17938	0.113035	-0.137643	0.176054	-0.13791	0.00316466	-0.176054	-0.13791	0.00316466	0	-0.28688	-0.170999	0	-0.202008	0.0693244	0.215973	-0.0620178	-0.0483589	0.15807	-0.0643509	0.061932	0.131541	-0.0048693	0.0450789	0.154447	0.00908989	0.0870516	0.0696371	0.00285506	0.0218844	0.112663	0.0134279	0.0250927	0.121845	0.0231655	0.0447655	0.0706695	0.0393251	-0.00242086	0.0663307	0.0806032	-0.0199438	0.0420143	0.0540498
mBpmk36	m	Scottish and Irish	0.190402	0.103048	-0.153068	-0.190402	0.103048	-0.153068	0.164501	-0.12216	0.00102213	-0.164501	-0.12216	0.00102213	0	-0.281595	-0.152978	0	-0.236457	0.0441285	0.204143	-0.0537463	-0.0268511	0.170698	-0.0467789	0.0453441	0.142109	0.000778645	0.0418057	0.16524	0.00184463	0.065478	0.0727159	0.011563	0.0194154	0.114545	0.0068134	0.024451	0.118853	0.0273353	0.0374605	0.0875499	0.0412514	0.00893538	0.0695754	0.072821	-0.0149769	0.053328	0.0480084
mBpmk37	m	Scottish and Irish	0.173532	0.113544	-0.145382	-0.173532	0.113544	-0.145382	0.176014	-0.135114	-0.0106716	-0.176014	-0.135114	-0.0106716	0	-0.26382	-0.15081	0	-0.206256	0.0661757	0.211279	-0.0793047	-0.0368402	0.164587	-0.0614611	0.0544603	0.139658	0.000444814	0.0409195	0.16173	0.00687898	0.0852389	0.077864	0.00719437	0.0225306	0.11177	0.0152095	0.0206143	0.119595	0.0325278	0.0389829	0.07195	0.0447069	0.00164025	0.0613692	0.0800834	-0.00777149	0.042336	0.0612088
mBpmk85	m	Scottish and Irish	0.192649	0.105525	-0.142642	-0.192649	0.105525	-0.142642	0.173471	-0.132114	0.00518496	-0.173471	-0.132114	0.00518496	0	-0.289656	-0.145922	0	-0.256111	0.00380631	0.203387	-0.068595	-0.0195429	0.154712	-0.0484217	0.0650892	0.130445	0.000133191	0.049301	0.150096	0.00554896	0.0783294	0.0871508	0.0101323	0.0193465	0.119409	0.014205	0.0161229	0.120038	0.0359667	0.0425683	0.0817147	0.0474362	0.00125101	0.0648422	0.07733	-0.00304313	0.0475525	0.0543796
mBpmk90	m	Scottish and Irish	0.176551	0.110834	-0.125387	-0.176551	0.110834	-0.125387	0.180899	-0.130718	-0.00627423	-0.180899	-0.130718	-0.00627423	0	-0.250391	-0.143088	0	-0.212617	0.0480898	0.210999	-0.0864169	-0.0433189	0.178047	-0.0379537	0.0605769	0.141356	0.00656805	0.0442403	0.163251	0.0127659	0.0848295	0.0717989	0.0104325	0.0158349	0.111529	0.0105652	0.0133327	0.120485	0.0335711	0.0454221	0.0767133	0.0402674	0.00168051	0.0623375	0.0724514	-0.0116734	0.0465029	0.0507635
mBpmk91	m	Scottish and Irish	0.180701	0.108035	-0.141712	-0.180701	0.108035	-0.141712	0.180595	-0.130487	-0.0172842	-0.180595	-0.130487	-0.0172842	0	-0.266284	-0.140033	0	-0.212117	0.0484966	0.210315	-0.0833698	-0.0290027	0.168634	-0.0498314	0.053877	0.142069	-0.00548357	0.0440159	0.163449	0.0104862	0.0715072	0.0717746	0.0199026	0.0162224	0.107922	0.0237288	0.025664	0.126647	0.0226163	0.0474661	0.0799254	0.0381878	0.00301093	0.0679737	0.0787051	-0.0102647	0.0526582	0.0562841
mBpmk112	m	Scottish and Irish	0.195056	0.107013	-0.155636	-0.195056	0.107013	-0.155636	0.175986	-0.136265	-0.00395042	-0.175986	-0.136265	-0.00395042	0	-0.28219	-0.164938	0	-0.197078	0.0355574	0.20354	-0.0667635	-0.0195953	0.158209	-0.0690664	0.0584269	0.128534	-0.0115741	0.0545561	0.157287	0.000719828	0.101546	0.0597436	0.0216369	0.0138418	0.101955	0.0175129	0.0211398	0.111476	0.0327948	0.0377921	0.0735897	0.0467487	-0.000337862	0.0684456	0.0871406	-0.0130465	0.047615	0.0669011
mBpmk113	m	Scottish and Irish	0.167568	0.128429	-0.152185	-0.167568	0.128429	-0.152185	0.168992	-0.126835	0.000711385	-0.168992	-0.126835	0.000711385	0	-0.276804	-0.14028	0	-0.231673	0.0470553	0.197551	-0.0754549	-0.0290162	0.162743	-0.0606472	0.051675	0.146964	0.00292766	0.0409738	0.161367	0.00908761	0.0668787	0.0796995	0.0118558	0.0250841	0.113178	0.00149942	0.0306507	0.119355	0.0388516	0.0455265	0.0887827	0.0431755	0.010563	0.0668002	0.078215	-0.0107002	0.0452499	0.0481391
mBpmk128	m	Scottish and Irish	0.179102	0.105572	-0.152486	-0.179102	0.105572	-0.152486	0.187122	-0.122668	-0.00024561	-0.187122	-0.122668	-0.00024561	0	-0.288637	-0.165037	0	-0.200021	0.0486781	0.204899	-0.0612756	-0.0358531	0.166184	-0.0577154	0.0513299	0.133891	-0.00187357	0.0478258	0.167442	0.00169018	0.0727569	0.0875244	0.00877409	0.0305484	0.111937	0.0126978	0.0365093	0.123164	0.036519	0.0443472	0.0773237	0.035578	0.0103335	0.0502835	0.0682197	-0.0118367	0.0417702	0.0370175
mBpmk147	m	Scottish and Irish	0.195173	0.102096	-0.154669	-0.195173	0.102096	-0.154669	0.182423	-0.131253	-0.00819521	-0.182423	-0.131253	-0.00819521	0	-0.296847	-0.169669	0	-0.224202	0.0480386	0.203334	-0.056434	-0.0334484	0.155373	-0.0634197	0.0567499	0.127944	-0.00300255	0.0459501	0.155046	0.00533588	0.0839354	0.0815	0.0123405	0.0243558	0.108668	0.020937	0.0285477	0.117172	0.038844	0.0516059	0.0723618	0.0465427	0.0103583	0.047064	0.0819849	-0.0101526	0.0402915	0.0549998
mBpmk148	m	Scottish and Irish	0.190391	0.0931848	-0.150643	-0.190391	0.0931848	-0.150643	0.185366	-0.11949	-0.00880872	-0.185366	-0.11949	-0.00880872	0	-0.289722	-0.167777	0	-0.237222	0.0512663	0.209304	-0.0485111	-0.0332679	0.163262	-0.0588641	0.0565144	0.142696	0.00323992	0.0440433	0.165792	0.00217839	0.081096	0.0682321	0.017276	0.0165855	0.0983519	0.0127883	0.0233638	0.11407	0.0352544	0.0445871	0.0659072	0.0425954	0.00396015	0.0553192	0.0740453	-0.00722027	0.0351364	0.0592597
mBSbrBet5	m	Scottish and Irish	0.182668	0.0974239	-0.155236	-0.182668	0.0974239	-0.155236	0.156663	-0.137196	0.00128416	-0.156663	-0.137196	0.00128416	0	-0.236035	-0.153413	0	-0.212141	0.0471914	0.205981	-0.08341	-0.0362716	0.168099	-0.0597286	0.0550553	0.139645	0.00336686	0.0398469	0.169863	-0.00117958	0.0633011	0.0668661	0.0265885	0.0188068	0.103621	0.0289853	0.0283027	0.128015	0.0347716	0.0467026	0.0724144	0.0504505	0.0010386	0.06226	0.0800679	-0.0069972	0.048042	0.0620502
fBSbrt6	f	Scottish and Irish	0.185069	0.0955666	-0.133137	-0.185069	0.0955666	-0.133137	0.178897	-0.129544	-0.00293944	-0.178897	-0.129544	-0.00293944	0	-0.303365	-0.166476	0	-0.224223	0.0398372	0.204607	-0.0793607	-0.0229984	0.155721	-0.0449719	0.0560764	0.14802	-0.000480079	0.0452698	0.160515	-0.00522569	0.047971	0.0739798	0.0217392	0.0188396	0.112649	0.021613	0.0293062	0.113659	0.0365263	0.0329065	0.083063	0.0436576	0.0119134	0.0705944	0.0735253	-0.0016802	0.0497527	0.0628032
fBSbrD2	f	Scottish and Irish	0.193621	0.115976	-0.138403	-0.193621	0.115976	-0.138403	0.170317	-0.129506	0.0112524	-0.170317	-0.129506	0.0112524	0	-0.269434	-0.163242	0	-0.237836	0.0409113	0.204821	-0.0868386	-0.0239316	0.157341	-0.0523802	0.0645706	0.131071	0.00688414	0.0409918	0.148317	0.00941789	0.0774913	0.0794747	0.0107868	0.00974259	0.108267	0.0150896	0.0104719	0.129317	0.0318596	0.0404262	0.0827535	0.0395975	0.00623554	0.0590833	0.0711595	-0.0152787	0.0469793	0.0438906
mBSnlHop21	m	Scottish and Irish	0.175226	0.100069	-0.153396	-0.175226	0.100069	-0.153396	0.179597	-0.132232	-0.00294049	-0.179597	-0.132232	-0.00294049	0	-0.272928	-0.154567	0	-0.227376	0.0434396	0.205768	-0.0691379	-0.0293442	0.183554	-0.0580342	0.0451846	0.145798	0.00692021	0.0401648	0.17056	0.0111175	0.0725909	0.0725271	0.0217664	0.0160053	0.110844	0.0269884	0.0199426	0.126439	0.0333917	0.0316864	0.0836017	0.0388373	0.011793	0.0715802	0.0584263	-0.00460503	0.0515154	0.0483165
mBSnlKoY	m	Scottish and Irish	0.189287	0.129273	-0.138433	-0.189287	0.129273	-0.138433	0.179869	-0.123482	0.0127592	-0.179869	-0.123482	0.0127592	0	-0.305626	-0.191908	0	-0.227213	0.0570387	0.20674	-0.070609	-0.0178986	0.155268	-0.0484167	0.071944	0.120583	0.00267307	0.0351759	0.146338	0.0244741	0.0855704	0.0776652	0.00511219	0.000308738	0.0989361	0.00541087	0.00127931	0.120034	0.0298883	0.0391558	0.075303	0.0345909	-0.000195911	0.0653234	0.0664576	-0.00952646	0.0502033	0.0429271
mBSbrLb	m	Scottish and Irish	0.193314	0.125514	-0.122122	-0.193314	0.125514	-0.122122	0.186192	-0.111188	0.015278	-0.186192	-0.111188	0.015278	0	-0.267803	-0.148537	0	-0.211253	0.0459743	0.213052	-0.0798169	-0.00975373	0.165761	-0.0670608	0.0507223	0.129141	-0.0056267	0.0447907	0.15708	-0.0134525	0.0708533	0.0687818	0.0233081	0.00948454	0.107948	0.0226767	0.0163174	0.118692	0.027926	0.0361013	0.0776113	0.0507654	-0.00848015	0.0629754	0.0792823	-0.0293583	0.0532088	0.0535653
fBSbrOMW	f	Scottish and Irish	0.199896	0.0905613	-0.153363	-0.199896	0.0905613	-0.153363	0.186792	-0.125066	-0.00418273	-0.186792	-0.125066	-0.00418273	0	-0.276881	-0.158711	0	-0.218076	0.0396181	0.213249	-0.0674041	-0.024111	0.169846	-0.0542647	0.0424415	0.132528	0.000792938	0.0395025	0.154561	0.00767073	0.067547	0.0746861	0.00788944	0.0238342	0.115646	0.014374	0.0195564	0.10691	0.0328288	0.0303393	0.0788454	0.0418534	0.010538	0.0541896	0.0744715	-0.000488728	0.0480092	0.0496538
mBSnlsb252	m	Scottish and Irish	0.176413	0.105238	-0.131843	-0.176413	0.105238	-0.131843	0.181578	-0.124908	-0.00632063	-0.181578	-0.124908	-0.00632063	0	-0.294836	-0.118532	0	-0.255389	0.0284459	0.209268	-0.0696391	-0.0322348	0.175357	-0.0664541	0.0368654	0.139316	0.00164486	0.0398814	0.152925	0.00446134	0.0680815	0.0722307	0.0164436	0.021137	0.110976	0.0186799	0.0243634	0.123039	0.0347093	0.0442205	0.0764513	0.0430427	0.00705005	0.0542599	0.0753776	-0.00437295	0.0474279	0.0529085
mBmdcFln959	m	Southern British	0.187462	0.0996416	-0.15574	-0.187462	0.0996416	-0.15574	0.170827	-0.131125	-0.0104287	-0.170827	-0.131125	-0.0104287	0	-0.267346	-0.136659	0	-0.227104	0.0286107	0.196993	-0.0785839	-0.0394861	0.16466	-0.0647438	0.0539313	0.139855	-0.00196821	0.0496572	0.158812	0.00575623	0.0720112	0.0751695	0.0179336	0.0345023	0.117122	0.0206337	0.0318287	0.12576	0.0394245	0.0424777	0.0810892	0.0402278	0.0126876	0.051277	0.0865355	-0.00783801	0.0516326	0.0494989
[truncated: 55 more columns]

## Sheet: Females
Id	pop	PC1	PC2	PC3	PC4	PC5	PC6	PC7	PC8	PC9	PC10	PC11	PC12	PC13	PC14	PC15	PC16	PC17	PC18	PC19	PC20	PC21	PC22	PC23	PC24	PC25	PC26	PC27	PC28	PC29	PC30	PC31	PC32	PC33	PC34	PC35	PC36	PC37	PC38	PC39	PC40	PC41	PC42	PC43	PC44	PC45	PC46	PC47	PC48
fIhsm21	Iceland	0.0101723	0.0381582	-0.00071794	-0.0156426	-0.00991805	-0.0185537	-0.00211648	-0.00459969	-0.00468601	0.0116705	0.0120162	0.00622804	0.00819029	0.007403	0.00247022	-7.4898e-06	-0.00525116	0.000123179	-0.00191831	-0.00636193	-0.00216642	-0.00795219	-0.00124342	-0.00220674	0.00128373	0.00515799	0.0130406	0.00860426	-0.00027411	-0.00541872	0.0035292	-0.00190056	-0.0042831	-0.00103733	0.00553031	0.00541842	0.00748549	0.00297965	0.00225526	-0.00154683	0.00100924	-0.00379634	0.00115453	-0.00206046	0.00205746	0.0024798	-0.000334468	-0.00137921
fIhsm11	Iceland	-0.0182668	0.0116243	0.000975577	-0.0176909	0.024895	-0.00421282	0.0207619	0.00665839	-0.00419125	0.00457773	0.00974412	-0.00569109	0.000876512	0.00566565	0.00923035	-0.00613751	0.0036509	0.00304642	0.00560689	0.0127202	-0.0097942	0.000277203	-0.00147	-0.00272471	-0.00145672	2.15946e-05	-0.00600155	-0.00833828	-0.00341892	-0.00489833	-0.0010781	0.00149523	-0.00898786	0.00652835	0.00153508	-0.00305656	0.000731504	-0.00599873	-0.000254631	0.00327448	0.00219514	0.000707128	-0.000160068	-0.00197386	0.00729736	-0.00167856	0.00180587	-0.000562213
fIhsm19	Iceland	0.0494203	0.0327163	0.00103258	0.0233749	-0.0308329	0.0049398	-0.0177541	-0.0159708	0.0166649	-0.0028293	-0.0252492	0.000548926	0.00753395	0.00829676	0.00843802	-0.00729802	-0.00692764	0.0390669	0.0102931	-0.00585143	0.00485877	-0.000282614	0.00496344	-0.00835732	0.00294613	-0.0130888	0.00639679	0.00397876	-0.00316089	-0.00630422	0.000486577	-0.000136248	0.00415884	-0.00123195	-0.00822623	0.00301988	-0.00120603	0.00117065	-0.00752166	-0.00541855	0.00226136	-0.000751002	0.00215861	0.000846098	0.000507404	-0.00368115	-0.000171076	0.00207451
fIkef7	Iceland	-0.0696941	-0.00181012	-0.0223117	-0.032566	-0.00733848	-0.00296954	0.0115073	0.0206364	0.000779053	-0.00702902	-0.00520601	0.00929968	0.00444251	-0.0135088	-0.00172226	-0.0171571	-0.00577485	-0.000128678	-0.0120369	0.00992154	-0.00366533	0.00373994	0.00121807	-0.0016684	0.00357569	-0.00385203	0.00183557	-0.00232096	0.00678956	-0.00196075	-0.00292319	0.00145613	0.00396063	-0.00781348	-0.000123786	0.00708046	-0.00418956	0.00564897	-0.00608401	-0.00292467	0.00131003	-0.0049281	-0.0011735	0.00345561	-0.00360721	0.000190829	-0.000419122	-0.00468311
fIkef9	Iceland	-0.0262487	-0.00040487	0.00481415	-0.0100821	0.0242547	0.00741671	0.0120362	0.00666108	-0.00738112	0.0179745	-0.00741923	-0.0123409	-0.0103307	0.00207348	0.0100761	-0.0143983	-0.014803	0.00384732	0.0129148	-0.000521823	-0.00499949	-0.00829663	-0.0103275	0.00634106	0.0163789	0.00123483	-0.000704307	-0.00349081	0.00591264	-0.00136234	-0.00216596	0.00220667	0.000566341	0.0069665	-0.00320708	-0.00298754	-0.000858297	0.00822382	-0.00466887	0.000983539	-0.00479497	0.000233979	0.00301785	0.00161665	0.00248336	0.00309432	-0.000985854	0.00170079
fIkef39	Iceland	0.00249245	0.0430699	0.00690184	0.0200749	-0.00758971	0.00935161	0.00263976	0.0276118	-0.00857624	-0.00483043	-0.000236962	-0.00829908	-0.0108254	0.013758	-0.00531329	-0.00121551	-0.00486718	0.00444	0.00142929	-0.00972764	-0.00554458	0.00548128	0.0024831	0.00192198	-0.00483905	0.0152567	-0.00841607	0.00951491	-0.00700355	0.000892148	-0.00535553	-0.000239143	0.0124591	0.000625903	-0.00324129	0.00673637	0.000809305	0.00323444	0.00266877	-0.0022199	0.00374799	-0.00129782	-0.000404602	-0.000115476	0.00699846	-0.00204372	0.00122671	5.34891e-05
fIkel5	Iceland	-0.0134342	0.0251316	0.0215945	-0.0153557	-0.0104788	0.0114768	0.0214674	-0.0206328	0.00830414	0.0248011	-0.00496988	0.0119295	0.0155653	0.0124643	0.00769356	0.00524344	-0.0135632	-0.017449	0.0062666	0.00551584	-0.00330107	0.0110461	-0.00534224	0.00731303	0.00696861	-0.000519677	0.00176661	-0.00398903	-0.00146891	0.00580814	-0.00716906	-7.70164e-05	0.00532526	-0.0033337	-0.00703908	0.00237581	-0.00105114	-0.00204415	0.000560221	0.00164152	-0.00161903	-0.000335054	0.00151287	0.000113325	-0.00501548	-0.00292215	-0.000658244	0.00289316
fIkelgg	Iceland	-0.0312211	0.0243104	-0.0163506	0.022392	0.00277093	0.0199694	0.00467278	0.0080792	0.0144196	0.0128959	0.00649627	-0.0247986	-0.00979595	-0.00497339	0.00857545	0.000305923	0.012485	0.00272258	-0.00593357	-0.00832429	-0.00736323	0.0044633	0.00698482	-0.00674138	-0.000102032	0.00317327	-0.00282855	0.00287597	-0.00454598	-0.00308182	-0.00246819	0.00350953	0.00546909	-0.00232501	0.00553886	-0.0023314	0.0072145	-0.0021772	0.00229638	-0.00215756	0.00416976	-0.00156686	-0.00321106	-0.00106092	0.000596803	-0.000155683	-0.00564185	-0.000519554
fIkelg2	Iceland	-0.000136053	-0.000165658	-0.0314729	-0.00488042	0.0153225	-0.00968903	0.0111169	-0.00893064	0.0266969	0.0122288	0.0123398	0.0109839	-0.00111307	-0.00645175	0.00138886	0.00726717	-0.0160989	0.0119159	-0.00104347	-0.0118032	-0.00313858	-0.0138814	0.0031847	-0.00331227	0.00877947	0.00109886	0.00752205	-0.00290089	0.00324299	0.0123641	-0.00228912	-0.00635665	0.00693065	0.00627138	-0.00165094	0.00122919	-0.00205392	-0.00479351	0.000671965	-0.00490901	0.00475817	0.000528678	-0.00387319	-0.000809368	-0.00316779	0.00147267	-0.00131291	-0.00111446
fIkelS14	Iceland	0.0008551	0.00266021	0.0122631	0.000881004	-0.00598414	0.0130078	-0.0105159	0.00783188	-0.00653666	-0.00113367	0.0118876	-0.00459728	-0.00326916	0.0142879	-0.00453904	-0.00194999	-0.00708334	0.00485118	-0.0127111	-0.00430016	-0.0026721	-0.00757692	-0.00304009	-0.00224957	0.00500769	0.00295341	-0.00116982	-0.00346213	0.00119847	0.00630543	-0.00170059	-4.01624e-05	0.00414562	0.0013265	0.00726997	0.00156077	-0.00300095	-0.00330733	0.000156545	-0.00452631	-0.000183228	0.000862602	0.00111469	0.00161986	-0.00308288	0.00121919	-0.00130927	0.00380018
fIhsm1	Iceland	-0.00355217	0.00316148	-0.0155857	0.00596769	0.0215203	0.000833248	0.00762794	0.0308868	0.00159814	0.00486999	-0.00957735	0.0109158	0.00864681	-0.0036352	0.00161164	0.00625631	-0.00818769	-0.00948301	-0.00770119	0.00224662	0.00446957	0.00159628	0.00403182	-0.00835444	0.0106575	0.00761287	0.000569077	-0.00858797	-0.00356785	-0.00700718	-0.00389909	0.00127856	-0.00250997	0.00100101	-0.0030412	-0.00363272	0.00115049	-0.000268567	0.00463154	-0.00106299	0.00074431	-0.00397888	-0.000107912	0.000723663	0.000629447	0.000432098	0.000478741	0.00150475
fIhsm3	Iceland	-0.0684059	0.0068079	0.00610673	-0.0234644	0.0236219	-0.00157627	0.00307243	0.001562	0.00739844	-0.00159413	0.000369511	0.00529682	0.00389296	0.00953414	0.00172797	0.00914994	0.00559553	0.0293464	-0.00417392	0.00602811	0.0186815	-0.00296777	-0.00111838	-0.00128527	-0.0139423	0.00135776	-0.0106759	-0.00724648	0.00468312	-0.005434	-0.00646309	-0.009664	0.00242477	0.00255794	0.000816809	-0.0010025	0.000838233	-0.00251056	0.00313788	0.00739682	0.000121623	0.00106408	0.000385812	0.00039421	-0.00166665	-0.000382373	0.00173245	0.00302315
fIhsm4	Iceland	-0.0107449	0.038389	-0.00186426	-0.0164991	0.0118003	0.00653272	-0.0060896	0.00373866	-0.00618727	-0.0100627	0.0104531	-0.00782563	0.000783464	-0.0122393	-0.00832865	0.0061661	-0.000231862	-0.00103704	-0.0126338	0.000377679	0.00193357	-0.000844402	0.00540024	0.00156899	0.00196814	0.00216506	0.00243611	0.0050805	5.71777e-05	-0.000524113	-0.00343167	0.00775276	-0.0018588	0.00427576	-0.00250271	0.00112862	-0.00124017	0.00396472	0.00179002	-0.00644179	-0.00158099	0.00562283	0.00126144	-0.00224119	0.00106522	0.000967554	0.000978287	0.00179267
fIhsm10	Iceland	0.00723338	0.0338604	-0.0157232	-0.00249099	-0.0217812	0.00496161	0.0146773	-0.0130163	0.00795526	0.0114251	0.00184501	-0.00766527	-0.00487273	-0.00398051	-0.00339992	0.003201	-0.0114083	-0.00942538	0.00995731	-0.00412884	-0.000361971	0.00118673	-0.00666711	0.00273572	-0.00697157	-0.00555827	0.00107063	0.00247362	-0.00109135	-0.000648894	-0.00881191	0.0012148	-0.00650497	0.00361168	0.0048042	0.00405753	-0.0035758	0.00394427	-0.005869	-0.00122734	0.00466294	0.000860437	-0.0064971	-0.00554974	-0.00160456	0.0025716	0.00269609	0.00197959
fIhsm13	Iceland	0.0133119	-0.0289986	0.00504084	-0.00751411	0.0109914	0.00954637	0.0174007	-0.00882718	0.0129017	0.0219872	-0.00157258	0.0122131	-0.015181	-0.00180894	-0.00678744	0.00631951	-0.00216549	-0.00262814	0.00275814	0.000474904	-0.00596275	-0.00879078	-0.00389801	-0.00672461	-0.00923436	0.00322737	0.00406176	-0.00483928	-0.00236479	-0.00224158	0.00965559	0.00176465	-0.0103257	0.00130149	-0.000238287	0.00694049	-0.00594493	0.00115893	0.0012592	-0.000763151	0.00332594	-0.00486217	0.00404378	0.00174073	-0.00143156	-0.00267891	0.00274773	-0.00123541
fIhsm14	Iceland	0.024635	0.0429114	0.00431034	-0.00674967	0.0185977	0.00821467	-0.0050618	-0.00558647	0.00310348	-0.0202171	-0.00807354	0.00947091	0.0220175	0.00402078	-0.0052459	-0.00187148	0.008678	-0.00940737	-0.00144385	0.00975857	0.00930591	0.00290129	-0.00965302	-0.0054834	-0.00200515	-0.00222219	-0.000583286	-0.00186353	0.00753747	0.00634786	-0.000713831	-0.000130428	-0.00811879	-0.00454294	-0.00405666	-0.00183442	-0.00423709	-0.000286305	0.00263473	-0.00461669	-0.00367189	-0.00480692	-0.00220544	0.00133822	0.000661086	0.00231274	-0.00203509	-0.00280642
fIhsm52	Iceland	0.0277947	-0.0011321	0.0018595	-0.00750345	0.0123876	0.00408576	-0.00306117	-0.0317476	0.0102758	0.0158256	0.00920677	-0.00426089	-0.0094324	0.00248411	-0.015934	0.00239128	-0.00288	0.0039792	0.00082705	0.00438099	0.00230276	0.00341433	-0.00640319	-0.00704092	0.00728433	0.00817222	-0.00234127	-0.00424001	0.0127975	-0.000651622	-0.0022426	0.00243576	0.00366095	0.00404676	-0.00367152	-0.00353254	0.00036322	-0.00566194	-0.0101008	0.000234394	0.00147596	-0.000302476	-0.000422866	-0.0034999	0.00169463	-0.00145605	0.000524492	-0.00188964
fIhsm26	Iceland	0.0570105	-0.00150041	0.019936	-0.0165096	-0.00102551	-0.00466346	-0.00111586	0.0138354	0.00238062	-0.0134329	0.0167166	0.00720922	0.00573048	-0.0107877	-0.00684411	-0.0100359	0.00125567	0.000992196	-0.0113794	0.0104734	0.00829006	-0.00341783	-0.000968121	-0.0103105	0.00415831	-0.00424181	-0.00225365	0.000979985	0.00854878	0.00218056	0.000909624	0.000350961	0.00341742	-0.000332151	-0.00217943	-0.00143616	-0.00141871	0.00663018	0.00422275	-0.00277728	0.00264362	-5.51335e-06	-0.000102964	-0.00468307	-0.000971342	4.43243e-05	-0.00271259	0.00304491
fIhsm27	Iceland	-0.0525805	-0.00932835	-0.0371849	-0.0484712	-0.0122615	-0.0109784	-0.0104105	0.00934009	0.00454961	1.17825e-05	0.00404696	0.00332607	-0.0119953	-0.0158214	0.0133506	0.00286973	0.0147705	0.00282553	0.00890369	-0.0133473	0.0110503	0.00669597	-0.00139724	-0.00500332	-0.0053958	-0.0107717	0.00871542	0.00286708	0.0014428	-0.00640536	0.000450075	0.000525184	-0.00130781	0.00220364	-0.00613321	-0.00129843	0.0059617	0.00858045	0.00532569	0.0016831	-0.00103051	-0.00152263	0.00299801	0.00056954	0.00246199	0.000210607	-0.00106754	0.00157435
fIkef1	Iceland	-0.0416458	0.00469043	-0.00403717	-0.00712203	0.00269039	0.00895363	0.0269121	-0.00603387	0.00140148	0.00183608	0.0107465	0.00837878	-0.00331784	0.00101067	0.00195076	-0.00385846	-0.00540887	-0.0091351	0.000193984	0.0064972	0.000530883	-0.00504041	-0.0113569	0.00939584	-0.00738139	-0.0082292	-0.00748747	-0.00299755	0.00155355	-0.00291594	0.00643788	-0.00266925	0.00189235	-0.0068806	0.00738536	0.00408283	-0.000521476	0.00338891	4.27182e-05	-0.000481274	0.00270453	0.0024456	-0.000803365	-0.00656483	0.00110068	0.00075871	-0.00221714	0.000999677
fIkef3	Iceland	0.026404	-0.00884721	0.0107184	0.0170016	-0.00974946	0.0167402	0.020604	0.0150869	0.00109323	0.0177054	0.000717214	0.00754012	-0.010477	-0.011132	-0.0148117	-0.00722452	-0.0124184	-2.5319e-05	0.00779545	-0.000826935	0.00594039	-0.0079265	-0.00109221	-0.00373971	-0.00461414	-0.0100687	-0.00996547	-0.00972796	-0.00342819	0.00453198	0.00773049	0.00157106	0.00021936	-0.00152073	-0.0024296	0.000671947	-0.000558528	0.000915352	0.00204337	0.00643693	-0.000837293	0.000919073	0.0017445	-0.00122197	0.00206147	0.00197908	0.00320264	0.00089441
fIkef20	Iceland	-0.00930373	0.0121235	0.0161301	-0.0270588	0.00318984	0.00157248	0.00868157	-0.0083235	0.0106514	-0.00317494	0.0142457	-0.0144078	0.0045644	0.0033076	-0.00184564	-0.0196126	-0.00147672	0.00731373	0.0092847	-0.00420937	0.00559423	0.00541265	-0.00284246	-0.00444938	-0.000371979	0.00109271	-0.00841276	-0.00486514	-0.00784623	0.00223999	0.00102075	0.00398208	-0.00234105	-0.00878126	0.00162481	0.000555389	-0.000567008	-0.00278762	0.0036587	-0.00486709	0.00180334	-0.000829629	0.00118167	0.0023029	-0.00208869	-0.00121501	-0.000359197	0.000815819
fIkef29	Iceland	0.00341901	-0.00133277	0.0133168	0.000637862	-0.00814745	0.0318246	0.0242569	0.0183033	-0.00613519	0.00106238	0.00191877	0.0146671	-0.00406145	0.00231186	0.00569255	-0.00390822	0.00692757	0.00459918	0.000529092	0.0114261	-0.000272607	-0.00327405	-0.000552528	-0.00745305	0.00393855	0.0082763	0.0035075	-0.0068281	-0.0099078	-0.00934678	-0.00112694	0.00232238	0.00183491	-0.000895375	0.0019869	-0.00642863	-0.00376074	-0.00509523	0.000550806	0.00134449	0.00228864	0.00976418	-0.00125445	0.00117679	-0.00130208	0.000881967	0.00102677	0.00207318
fIkef12	Iceland	0.00595568	0.00439316	0.0149274	2.99505e-05	0.0126239	-0.00262145	0.0101545	-0.00959819	-0.0104238	-0.00743741	0.00627139	0.0101252	-0.0120018	0.000917048	-3.08487e-05	-0.0165202	-0.0259624	-0.000998595	0.00930077	-0.00478001	0.00396366	-0.0100217	0.00115936	0.00998732	-0.00563684	-0.00250875	-0.00338777	0.00649725	-0.00934765	-0.00840473	0.0107251	-0.00300078	0.0011159	-0.00085926	-0.00205852	-0.00192161	0.00426518	-0.00883972	0.00159827	-0.00038389	0.0042421	-0.00120987	-0.00235115	-0.000439868	-0.00142756	-0.000483824	-0.00377643	-0.00177774
fIkef30	Iceland	-0.0525374	0.0311861	-0.0105324	0.0265035	-0.00726557	0.0149733	0.00138108	-0.00121973	-0.000208687	0.015453	0.00222142	-0.0117874	0.0157111	0.00424429	-0.0101007	0.00172207	-0.00986072	-0.00642026	-0.000635895	-0.0100424	0.0106989	-0.0089178	0.000500273	-0.00418225	0.00515317	-0.00876806	-0.00642572	0.0061787	0.00986603	-0.00155956	0.00763532	-0.00696764	-0.00423463	0.00327642	0.00568686	-0.00101243	0.000343329	0.00162997	0.00122039	-0.000223144	-0.00155523	0.00313527	5.20687e-05	0.00117168	-0.00432625	0.000995375	-0.002	-0.000500131
fIkel4	Iceland	-0.00116864	0.0023878	-0.0118174	0.0195104	0.0197613	0.0112	-0.00227641	-0.02271	0.0182253	-0.0246536	0.00386172	0.0259924	-0.00274823	-0.000117932	0.00793691	-0.00141021	0.00540879	0.000148734	-0.00531114	-0.00299972	-0.00596755	0.00851372	-0.00230942	0.002896	0.00839673	-0.0028001	-0.00201131	0.00422862	0.00173407	7.2786e-05	-0.00631919	0.0061032	-0.00325641	-4.62346e-05	0.00453413	-0.00176804	-0.00603789	-0.00169161	0.00965261	0.000874502	0.00462391	-0.00257962	-0.00067486	-0.00244133	-0.00156362	-0.00221777	-0.000928145	0.00285098
fIkel10	Iceland	0.00401834	-0.0410263	-0.0160765	0.0119738	0.00223905	-0.00318279	0.0669999	-0.0234248	0.00181647	-0.0247989	-0.000443546	-0.0417674	0.0239848	-0.00842528	-0.0170526	0.00712588	0.0114985	0.00599455	0.0117093	0.000427457	0.00635971	0.0030531	-0.00646952	-0.00816993	0.00216815	0.00838229	0.010465	0.00215886	-0.00141004	-0.00333227	0.00151832	-0.00747549	0.00408496	0.000627706	0.00616152	-0.00307047	-0.000113072	-0.000720272	-0.000311921	-0.00190376	-0.00134648	0.000725173	-0.000113558	0.00323052	0.000827865	0.0016211	-0.000442997	1.44493e-05
fIkel14	Iceland	-0.000440457	0.00533264	-0.00351767	0.00808916	0.00173176	0.0223608	-0.0146784	-0.0013972	-0.0076158	-0.00955703	0.0105354	-0.00723376	-0.00412391	0.0113534	-0.0136955	0.000120273	0.00717923	0.00882564	-0.0128299	-0.00969514	-0.00295225	-0.00529311	-0.000361252	0.00381822	0.000405384	0.00058543	0.00236875	-0.00677015	-0.00114194	0.00907782	-0.000931186	-0.000496	0.00301395	0.00332999	0.00618277	0.00304505	0.0016847	-0.00384028	-0.00232908	0.000102464	-0.00199721	-0.00529494	-0.00361675	0.00416779	5.6172e-06	0.00203563	0.000878664	0.00115513
fIkel19	Iceland	-0.0104921	-0.013941	-0.0015192	-0.0073586	0.00813587	0.0134242	-0.00288196	-0.00395264	-0.00952528	-0.00943733	0.0132098	0.00223506	0.00775009	-0.00246368	0.00497568	-0.00434131	-0.015966	0.00223599	0.00461873	-0.00759027	-0.00371479	0.00151757	0.000545857	0.00230757	0.00541914	0.00602031	0.00116977	0.00407524	0.000783725	0.00834091	-0.00683958	0.00229379	-0.00354641	-0.00491043	-0.00443532	-0.000128832	-0.00570369	-0.000677049	-0.00188544	-0.00103947	-0.00346172	0.006378	-0.00311785	-0.000889173	-0.00123648	-0.00161718	-0.00200269	-0.00214331
fIkel30	Iceland	-0.0513787	0.0354203	-0.0118362	0.0299786	-0.0123391	0.0146208	-0.00326087	0.000391965	-0.00270767	0.0196325	0.00357424	-0.00926889	0.00910262	0.00815486	-0.0182518	0.00913816	-0.00157008	-0.0143027	-0.0138833	-0.00154659	0.00307613	-0.00371843	0.0045183	0.00145627	-0.00188605	-0.00472054	-0.00134109	-0.00200739	0.00281237	-0.00233267	0.00385234	0.00304856	-0.000825847	-0.00232924	-0.00255999	-0.00246185	0.000635932	-0.00452289	0.000244565	-0.0017868	-0.000700782	0.00478154	0.00360666	0.0014559	0.00209348	-0.00709891	0.00218809	-0.00080616
fIkel29	Iceland	-0.00266311	-0.000177046	-0.012818	0.00602068	0.00259412	0.0135174	0.0102206	0.0139825	-0.00383145	-0.00471225	-3.9944e-06	-0.000864425	-0.000458916	0.00638181	0.0005864	0.00127336	-0.0156081	0.00287725	-0.00111437	0.0115079	0.0073495	0.00397898	0.0021852	0.0071644	-0.00376535	-0.00901438	0.00755511	-0.00401526	-0.00125499	0.00209054	-0.00194352	0.000982072	-0.00158516	-0.00276184	8.1332e-05	0.00427866	0.00756591	0.000610352	-0.00442743	0.00169803	-0.000243104	-0.00353369	-0.0024474	-4.76075e-06	0.00475011	0.00192577	0.00227975	-0.000577034
fSden4005	Scandinavia	-0.0010157	-0.000652444	0.0164717	0.024264	-0.024132	0.00536134	-0.0294819	0.0105208	-0.0286375	-0.0177567	0.00742398	-0.00909954	0.00916464	-0.00795139	-0.00131744	-0.00299362	-0.0159439	-0.006653	0.000416132	0.00483721	0.00150037	-0.00664686	-0.00438356	-0.00394834	0.000414245	-0.00661409	-0.00434806	0.00484635	-0.00586934	-0.00536816	-0.00719953	0.00156151	0.00326528	0.00129913	0.00245919	0.00222269	-0.00242194	0.00122142	-0.00100257	-0.00126426	-0.00130888	-0.00375556	0.00420463	-0.00023838	0.00180027	-0.000790167	0.00214937	-0.00151593
fSden4	Scandinavia	-0.0187652	-0.00861409	0.00171784	0.00673132	-0.00694495	-0.00669662	0.00987912	-0.00786946	0.0130284	-0.0230494	0.0147148	0.00430211	0.00987804	0.000259481	0.0144233	0.00117596	0.00508328	-0.00606855	-0.00632948	0.000160906	-0.00527785	0.00419459	-0.010121	-0.0135113	-0.00573109	0.00395352	0.00169732	0.00693441	-0.0108941	0.00164946	0.0110789	0.00506385	-0.00128245	0.00114701	-0.00345976	0.00515228	-0.00120709	-0.00274389	-0.00326506	0.0035165	-0.00224115	-0.000434996	-0.00171668	-0.00533896	0.000220554	0.00197379	0.00364989	-0.00016244
fSdenKL	Scandinavia	-0.0217359	0.0102163	0.0152359	0.00229924	0.0189965	-0.027647	0.00572731	-0.00894714	-0.0106742	-0.00265363	0.0116338	-0.0230737	-0.0056479	0.00605311	0.00553961	0.00943067	0.00528026	0.00716305	-0.00821692	0.000810785	0.00349173	-0.00812666	0.00548775	-0.00656069	-0.00579225	-0.00239011	0.00113935	-0.000889464	0.00239643	0.00200475	0.00706095	0.00254388	0.00209591	-0.00166391	-0.00195925	0.00197098	0.000531413	0.000515209	-0.00121152	-0.00102095	-2.71537e-05	0.00170063	0.00138867	0.00169674	0.00122773	0.000581912	-9.0386e-05	0.0022703
fSnorV1	Scandinavia	0.04098	0.00832584	0.0560778	0.0333661	0.0290632	0.0194558	-0.0209087	0.00693329	0.00598717	-0.00945072	-0.0178221	-0.0225497	0.0179453	0.00205109	-0.0143026	0.0118545	0.00427649	0.00536792	0.00775919	-0.00919195	-0.0239503	-0.00353161	0.000260554	0.00310741	-0.00825238	-0.0142652	0.00190005	-0.00382295	0.00249359	0.00437477	0.00057777	0.00100889	-0.00101594	-0.00588414	-0.00399041	0.00107756	-0.00167702	0.00588631	-0.000386004	0.00714927	0.00394306	0.00467582	0.000455564	-0.00275715	0.000569033	0.00394722	0.00017315	-0.00137397
fSnor2853	Scandinavia	0.00500803	-0.00467636	0.0138083	0.00390566	-0.0167926	-0.0313644	-0.0218245	0.0100338	0.0119268	0.0149434	0.00789287	0.0128924	0.0140597	0.0153689	0.00456416	-0.00149005	-0.00594734	0.00601291	0.00750981	0.00546109	0.00899436	0.00306382	-0.00271363	0.00329094	-0.00109205	0.00401913	0.000277113	0.00663434	0.00532909	0.0074262	0.00486821	0.00299852	0.00770191	-0.00218273	0.00500865	-0.00136333	-0.00426735	0.000172235	0.00133592	0.00122841	0.000147647	-0.00297708	0.00309365	-0.00225053	-0.00318502	0.00442116	0.00194257	-0.0033215
fSdenS27	Scandinavia	-0.00642272	-4.20213e-05	0.00368606	0.00122998	-0.0160604	-0.0250022	-0.0121769	0.00785709	0.00506049	-0.00681951	0.00206006	-0.012853	-0.0090219	-0.0188532	-0.00326003	-0.0109585	-0.0176414	0.00360888	-0.0012706	-0.00806146	0.00520615	0.000945681	0.00834982	-0.00328432	0.00927886	-0.0095938	-0.00237733	-0.0159995	0.00169754	-0.00281873	0.00882642	0.00438396	0.00741385	-0.00550367	0.00200291	-0.000204952	-0.00649386	-0.00072184	0.000332931	0.00106578	-0.0052538	-0.00223263	-0.00384773	-0.00386117	0.0013778	-0.00245033	0.00117107	0.00200649
fSdensh	Scandinavia	0.0264743	-0.0255014	-0.0167051	0.039908	0.00555763	0.02966	-0.00438205	-0.00340559	0.0134154	-0.0150096	0.0343999	0.0101902	-0.0259664	0.00937135	0.00693715	-0.00311098	0.0187178	0.00257509	-0.0109239	0.00940987	-0.00305189	-0.00134799	-0.00227995	0.0011303	0.0122687	-0.00449023	-0.00689963	-0.00540334	-0.00148694	-0.00343291	0.00170147	-0.00635657	0.00239518	-0.000110685	-0.00857601	-0.00126442	0.000565766	0.00678464	-0.00390923	-0.00431103	0.00257427	-0.000380901	0.000200025	0.00134974	0.000787611	0.00173008	-0.000827941	-0.00224937
fSnor4503	Scandinavia	-0.0133106	0.0380963	0.00166757	-0.0253549	0.0180366	-0.00426013	0.00356767	0.00265725	-0.0173276	-0.0119878	-0.00788695	0.021553	-0.0101913	0.00774623	-0.00774445	-0.0215284	-0.000121823	-0.000423753	0.0117701	-0.0147939	-0.00630432	-0.00841442	-0.000113169	0.00415122	0.00630711	0.004353	0.00485984	0.00235453	-0.00479855	0.0053755	-0.0056424	0.00297096	-0.000366684	-0.00503616	0.000374677	-0.00380306	0.0131942	0.00115345	-0.000410034	0.00716221	-0.00420649	0.00322576	-0.000508902	-0.00123675	-0.00234678	0.00226454	0.00198504	-5.79993e-05
fSnorE1652	Scandinavia	-0.00936225	0.0140441	-0.0127996	0.0149606	0.0269282	0.0148498	-0.00099371	-0.00213901	0.0263934	0.0117083	-0.012097	0.0154059	-0.00661725	0.00959917	0.00892841	-0.00199156	0.000751673	-0.00381707	-0.00715618	-0.00271685	-0.00237039	0.00559802	0.00627168	0.00532651	-0.00115023	0.0022805	0.00314047	-0.00053117	0.00418072	0.00781881	0.00627907	0.00289844	-0.000389737	-0.00101829	0.00129063	-0.000579708	0.00295614	0.0039255	-5.46444e-06	0.00140142	-0.000110024	0.00405834	-0.0025238	0.00379458	0.000628708	-0.00543453	0.00019891	0.000192756
fSnorE1540	Scandinavia	-0.0323591	-0.00816773	-0.0467289	0.0150134	0.0326435	-0.01572	-0.0014968	0.00315515	0.0246335	0.00811925	0.002288	0.00314927	0.0105366	0.00821367	0.00312162	0.00346488	-0.000877044	-0.00655891	0.00840242	-0.000473673	0.00422084	0.00237727	0.000421118	-0.00869489	0.000880047	-0.0064856	-0.00356807	0.00715516	0.00287224	0.0102252	0.00230902	0.00291112	0.00199288	-0.00139462	-0.00363951	0.00295277	0.00251678	0.000709291	-0.00225779	2.65784e-05	-0.00060358	-0.000390713	4.86949e-05	0.00176467	0.00301059	0.000481174	0.00011925	-0.00226191
fSnor1508	Scandinavia	0.00298471	-0.00515674	0.0250979	0.0165476	-0.0119436	-0.0280703	0.0177242	0.0181095	0.014491	-0.0143653	-0.00785107	-0.00415414	-0.0040885	0.00141724	-0.0109225	-0.0243459	0.00631127	0.00388936	0.00355646	-0.00507123	-0.00865846	0.0144477	0.0052912	0.00393034	0.00244082	-0.000398697	-0.0144775	0.00165004	0.0127614	0.0050354	0.00432894	-0.00266013	-0.00601658	-0.0044007	-0.00274507	-0.00148326	0.00353307	-0.00819857	0.00128748	-0.00195841	-0.00295157	-0.00255311	0.00360016	-0.000799243	0.000221959	0.00111136	0.00228837	0.00154124
fSden1513	Scandinavia	0.00689168	-0.0537177	-0.0245333	0.00352749	0.0122612	0.0199704	0.00341327	0.00941713	0.00857957	0.0240194	-0.0108905	-0.0220145	0.000316023	0.0143367	0.00112592	-0.027109	0.0082189	-0.0119458	-0.00100925	-8.59422e-05	0.00278961	-0.000320768	0.00845419	0.00763572	0.00213216	0.003142	0.000170636	0.00900153	-0.00816275	0.00273108	0.000700046	-0.00113185	-0.0037249	0.000792395	0.000466536	0.00461622	-0.00609593	0.00243914	-0.00203006	0.00650701	-0.00239188	-0.00632375	-0.000794721	-0.00483831	-0.002027	-0.00305636	4.91512e-05	-0.000207692
fSnor4721	Scandinavia	-0.0422055	-0.0320328	-0.00163	0.0058636	0.0270146	-0.00902064	-0.0210483	-0.0239619	-0.0238895	-0.00314742	-0.0115516	0.00794756	0.0119643	-0.000561949	-0.00284882	-0.0169175	0.0154602	-0.00297655	-0.0093811	-0.00568847	0.0105213	0.0084918	-0.00182525	-0.00242534	0.00959288	-0.00523847	0.0123743	-0.00460481	-0.00670242	0.00641916	0.0100565	0.00187071	0.00642847	0.00290643	0.00278398	-0.000744621	-0.00241537	-0.00284576	0.00061125	0.00529439	0.00418702	0.00209079	-0.00145937	-0.00232581	0.0046641	0.00145025	-0.0010585	-0.00233887
fSden1537	Scandinavia	-0.0141054	-0.0419851	-0.0121027	-0.017956	0.0154382	-0.025595	-0.018772	-0.00886678	-0.00450197	-0.0119201	-0.00536854	0.00907643	0.00587372	0.00591507	-0.00993544	-0.000594378	0.00414279	-0.0151459	0.0143411	-0.00121027	0.00233576	0.000252329	0.0107385	-0.00897407	-0.00622646	0.00611807	-0.0117686	0.00224195	-0.00657653	0.00418633	-0.00637319	-0.000221442	0.00552045	0.004767	-0.00169007	0.00475176	0.000479935	-0.00320694	-0.00669824	-0.00299667	0.00234146	0.0048307	-0.00500359	-0.000930546	-0.00011391	0.000545926	0.000768513	0.00290432
fSden12	Scandinavia	0.0117489	0.00443942	0.0120356	0.0170975	0.00745042	0.00987252	0.0214191	0.012859	0.00810939	0.00275768	-0.0029646	0.00272124	0.00226087	0.00397384	0.0106749	-0.000606684	0.00585581	-0.00861739	-6.70759e-05	0.00342079	-0.00799059	-0.00260153	-0.000275383	-0.00126614	-0.00439436	-0.00778368	0.000556203	-0.00262547	-0.000231715	-0.0052858	0.00124791	-0.00293377	0.00213956	0.000374997	0.0048915	-0.00213843	0.00458795	0.00346923	-0.000654247	-0.00445445	0.000523031	1.81022e-06	-0.000541149	0.00294025	-0.00440475	0.00334258	-4.38665e-06	-0.00120406
fSnor4007	Scandinavia	-0.00289787	0.00902409	-0.00571793	-0.00567847	0.00319162	0.0339917	-0.0150778	0.00858322	0.0215123	-0.00354878	0.0197233	0.0146633	0.0078561	-0.0118189	-0.0126914	-0.00515266	0.0015448	0.000297951	0.0235095	-0.00892893	-0.00558877	0.00296207	-0.0137262	-0.00282792	-0.00582572	0.00753595	0.00190098	-0.00208599	0.00195215	8.32715e-05	0.0014408	-0.00900885	-0.0011694	-0.000582973	0.00969053	-0.00481618	-0.00100681	0.00170676	-0.000959422	-0.00227576	-0.00208698	-0.00183894	0.00581132	-0.00210364	0.0012082	-0.00366771	-0.0010516	-0.00314899
fSnor4008	Scandinavia	-0.00300068	-0.0326407	-0.0110309	0.0274911	-0.00557004	-0.0140758	0.00607819	0.009021	0.00416992	-0.00518684	0.00309636	0.0121545	0.015258	-0.0119245	-0.0121548	-0.00140127	-0.00917472	0.0146621	-0.000153623	0.0113855	-0.00505067	-0.00332348	0.00598504	0.0069985	-0.00401676	0.00536137	0.00358245	0.00582271	-0.0032987	0.00251346	-0.00271108	-0.000686587	0.00292111	0.00612891	0.000789816	-0.00551722	0.00632591	0.00630288	0.00159987	-0.000523523	-0.00331298	0.00121653	0.00155276	0.000550255	0.00299587	-0.00360785	-0.000237453	0.000600999
fSdenS2	Scandinavia	-0.0303264	0.0209151	-0.0167359	0.0227181	-0.0088463	0.0117937	0.0047048	0.0138469	0.018945	-0.0157062	-0.0135086	0.00153162	0.0133702	-0.00624081	-0.0068278	0.000388071	0.00107314	0.00996834	-0.00347886	-0.00439239	-0.00386026	0.00421466	0.00335009	0.00748817	0.00325882	-0.00276549	0.00460702	-0.00120124	-0.00859489	-0.000459665	0.000680691	0.0083149	-0.00703841	0.00308441	-0.00408477	0.00104629	-0.00227317	-0.00338867	-0.00248367	0.00526959	0.000204925	-0.00689471	0.00337298	0.002363	0.00159872	0.00515598	-0.00488575	0.00270671
fSdenS5	Scandinavia	-0.0241561	0.00194297	-0.020224	0.0399617	0.0147487	-0.018762	-0.0193282	0.00434688	-0.00540072	-0.00272867	0.00630532	0.0101234	0.0022941	-0.0115797	-0.00395029	0.00415978	0.00234958	0.0112616	0.00548835	-0.00696402	-0.0016315	0.00476378	-0.00874654	0.00311649	0.000808419	0.00964477	0.000421021	-0.000816307	-0.00726216	0.00251627	0.00645352	0.00851258	0.000675466	-0.00211266	0.00246949	-0.00954844	-0.0022495	0.00345839	-0.000375479	0.00223313	-0.000867044	-0.000172737	-0.00143498	0.00412214	-0.00345328	-0.00164707	0.00492551	-0.00257046
fSdenS14	Scandinavia	-0.000715994	-0.00922459	0.010531	0.0205446	-0.040807	0.00720133	-0.00143687	-0.0193628	0.0138697	0.00361196	-0.00430146	0.0226336	0.0113264	0.000987355	-0.00141022	0.00644173	0.00544017	0.00975715	0.00734046	0.00721332	-0.00716827	0.00184413	0.000825724	0.0031648	0.00467414	0.00385491	-0.00155425	-0.000602941	0.00320733	-0.00633815	0.00491894	0.000847226	-0.000791478	0.00317317	0.00368808	0.00674755	-0.00181574	-0.00144757	0.000548689	-0.000772081	-0.00384785	0.00598151	-0.00024608	0.00240443	0.00115355	0.00194826	0.00163912	-0.000935258
fSnor4407	Scandinavia	-0.0378167	0.00939747	0.0496381	0.0207188	0.0249766	-0.0116313	-0.000285377	-0.00699154	-0.00482045	0.00750368	-0.0140138	-0.00169493	-0.0109271	0.0142822	-0.00878539	0.0129075	0.0231626	0.000509462	0.0170944	0.0116672	0.00207096	-0.0109974	0.00178155	-0.00423013	0.00899229	-0.00465482	-0.00280673	-0.00169637	-0.00307281	-0.00409666	0.00408681	0.00873905	0.00442909	0.00935302	-0.00823391	0.000903187	0.0026751	0.003419	0.00247574	-0.00397929	-0.00478669	-0.00215943	-0.00282551	-0.00447626	-0.00670984	0.00182815	-0.000225277	-0.00281267
fSnor2815	Scandinavia	0.0114237	-0.0129808	-0.0127676	0.00505321	-0.00122843	-0.00966033	-0.00894937	0.0120027	0.0187547	0.00304047	-0.00242118	0.00873872	-0.014949	-0.00494581	-0.00795236	-0.00337577	-0.00404027	-0.00107316	0.000900528	0.00461989	0.00429311	-0.00162233	0.000416712	0.00322499	-0.0036591	-0.00627452	0.00668623	0.00253796	0.0110068	0.00344293	9.04075e-05	0.0051847	-0.00391836	0.00493393	0.00348699	3.06263e-05	0.00587077	-0.000607699	-0.00487429	-0.000931531	-0.00562985	0.00380783	-0.00349252	0.00198429	0.00547561	0.00206119	-0.00189467	0.00244651
fSden5	Scandinavia	-0.0424714	-0.0162279	0.0660598	0.00718474	0.0123357	0.00336104	-0.000380613	-0.00970607	0.0312568	0.00439614	-0.0193289	0.00477209	-0.0309232	-0.0154639	-0.00262614	-0.00135048	0.00124453	-0.0100164	-0.00126529	0.00364968	0.0140511	-0.00983981	-0.00471649	0.00597793	-0.00660323	0.00721384	0.0109926	-0.000414404	-0.00940401	0.00139403	-0.00324309	-0.00410412	0.00560357	0.00282445	0.00088181	0.000411522	0.000382399	0.000338802	-0.00200075	-0.00516497	-0.00578047	-0.00515516	0.00708654	-0.00202748	0.000453144	-0.000639435	-0.0020982	0.00187894
fSdenVe1	Scandinavia	-0.0457274	-0.0189984	0.0650972	-0.00332844	0.0116607	0.00727411	-0.0116195	-0.0016348	0.0140535	-0.0150411	0.00945126	0.00319237	0.0209307	0.0131626	-0.00551211	-0.00378152	-0.00921643	-0.000661125	-0.0132204	0.00402483	0.00924634	0.000422877	-0.000358571	0.00398906	-0.00960903	0.00172581	0.00435811	0.0028047	-0.00211078	-0.00362764	-0.00505564	-0.00166061	-0.000104416	-0.00154622	-0.00430727	0.00696203	-0.00289921	0.00385182	0.00287769	0.00337803	-0.000766411	0.00230052	-0.00311307	0.00375181	0.000219205	0.000622199	-0.00109844	0.00295567
fSdenBFF	Scandinavia	0.00225545	-0.0121593	0.0107002	0.00627617	-0.0087521	-0.005305	0.0144838	0.030747	-0.0180821	0.0117215	0.0137578	0.00064485	0.00970015	-0.00121408	-0.0179705	-0.00391972	-0.00101474	0.00649924	-0.00247839	-0.0126153	0.0119375	0.0149767	0.00332894	0.00985172	0.00734615	-0.00651548	0.0028987	-0.000678082	-0.00441207	-0.00194692	-0.00225955	-0.00915735	-0.00738105	0.00732809	-0.00259623	-0.00380304	-0.0069932	-0.00120067	0.00411863	4.00055e-05	0.00302256	0.00331754	0.000838487	-0.00269541	-0.00156775	0.00309977	-0.00357276	-0.00317761
fSdenGls	Scandinavia	-0.0127454	-0.0137726	0.0231435	-0.0128414	0.00499956	0.0122816	-0.0178425	-0.0192754	-0.00250926	0.00168166	0.0343611	-0.011304	-0.0107472	0.00221622	0.00724538	0.0127094	-0.0160532	0.00687733	-0.00730791	-0.00208546	-0.0100738	0.0201612	0.00331731	-0.000927202	0.000944924	-0.00830787	0.00559202	-0.00131675	-0.00300019	0.00072492	-0.000883414	0.00693283	-0.00597748	0.00655665	0.00602564	-0.0014014	0.00490098	0.00160196	0.00253279	-0.00207996	0.00311096	-0.00162485	0.00488231	-0.00220703	-0.00171776	0.00309073	0.00528154	0.000928694
fSdenHesj	Scandinavia	0.0378521	-0.0301814	0.0355355	-0.0275351	-0.0162553	0.00767403	0.011033	-0.0154016	-0.0185656	0.0114436	0.0238041	0.00356126	-0.00149406	0.0060587	-0.00225896	-0.0051813	0.0018529	-0.00291547	-0.00586963	0.000369211	-0.00999117	0.0016669	0.00607533	-0.0134975	-0.00124541	-0.00125182	0.00561363	0.00136236	0.00326614	0.000617893	0.00463252	0.000198817	-0.00238668	0.00270025	-0.000468768	0.00197369	0.00201964	0.00425765	-0.000575258	0.00163924	-0.0017574	-0.00306937	-0.00230054	0.00519655	0.00276422	-0.000519515	-0.00294699	-0.00090375
fSdenKay	Scandinavia	-0.0122581	-0.0578468	0.00178094	0.0179881	-0.018846	0.0133756	-0.007733	-0.0184209	-0.00269527	0.00344122	-0.00483532	0.00262779	-0.00656855	0.00405992	-0.00678989	0.00288552	-0.00530091	-0.00470975	-0.0100722	-0.00894208	-0.00715345	-0.000667348	-0.00707789	-0.0108079	-0.00126818	-0.00894078	-0.00862638	0.011802	-0.00532491	0.0033392	-0.0059595	-0.00866234	0.00130397	0.00524371	0.000657068	-0.00871964	0.000523378	0.00112332	0.00237994	0.00350079	-0.00335042	-0.0071191	-0.00184366	0.00319137	-0.000279756	-0.00190641	0.00186728	0.000152274
fBpby100	Southern British	-0.00327633	0.00233108	0.00211923	-0.0201216	-0.00219647	0.0252989	0.0058233	-0.0112817	-0.0068897	0.013652	0.00162013	0.00157189	-0.0129259	-0.0231472	-0.00670386	-0.000294663	-0.00196806	0.00915808	0.00561338	0.0165307	0.00169565	-0.014094	0.0113994	-0.00489477	0.000537893	0.00404775	-0.000724551	0.0171003	0.00490645	0.00380949	0.00829701	0.00151672	0.00119189	-0.00808992	-0.00415894	-0.00248275	0.000414531	-0.00516526	0.005877	0.00199604	0.00568908	0.000777429	-0.000459781	0.000755499	0.00186904	0.00420103	0.00143841	-0.0014305
fBpby110	Southern British	0.0127167	0.00982544	-0.00544469	0.0178856	-0.000258896	0.0199771	0.0154328	-0.0351916	-0.0207728	-0.00328149	-0.0396569	0.0141731	0.00313556	0.00130987	0.0213329	-0.00141977	-0.0113819	0.0241821	-0.00473782	-0.000817434	0.00960504	0.00964552	0.000911138	-0.000245688	-0.00873453	-0.000465005	-0.00436348	-0.000145858	-0.00552523	0.00715027	-0.000963467	-0.00233472	-0.00319338	0.00188948	0.00598993	0.00133353	-0.000286738	-0.000447571	-0.00320835	-0.00453796	-0.00288512	0.00299417	0.00260984	-0.00239021	0.00247864	-0.000428282	-0.0011602	-0.00311945
fBpby126	Southern British	0.0147511	0.0201538	-0.0255493	-0.0103108	0.0170109	0.0144368	-0.0349504	-0.0103782	-0.0063778	0.00722029	0.00395629	-0.00777208	0.015732	-0.00905482	0.00281501	0.0217077	-0.00558706	0.00150722	0.000598275	0.0134308	-0.00549241	0.00443338	-0.00205157	0.00783288	-0.00308316	-0.00119406	-0.00801819	-0.00372119	-8.11227e-05	0.00257008	0.00334244	0.00116385	0.00887955	-0.000154986	0.000548876	-0.00398235	0.000142871	-0.00512134	0.00415679	0.000860939	-0.00992061	-0.00513451	-0.00102322	-0.00305222	0.00154667	0.00171625	-0.00374787	0.00127243
fBpby155	Southern British	0.0419303	-0.0366557	-0.0133498	0.0291081	0.0245535	-0.017965	0.0365521	0.0100816	-0.000664864	0.00289598	-0.0114588	0.00935842	0.00470511	-0.00314734	0.0120387	0.0102391	-0.0122562	0.00448808	-0.00752118	-0.00635824	-0.00638387	0.0025396	0.00438605	-0.000326984	-0.00367372	0.00937087	0.00334695	-0.00477948	0.00700575	-0.0125648	-0.00020727	0.00125401	0.00764506	-0.00321163	0.000989404	0.00361349	0.00224647	-0.00261757	0.00218451	0.00066371	-0.00107182	-0.000341732	0.00237873	-0.00552047	-0.000155476	0.00114182	0.00127997	-0.000294167
fBpby276	Southern British	0.0644746	0.0120823	-0.0208379	0.0041603	0.0166626	0.00656664	0.0220947	-0.00143343	-0.0250094	0.00308911	-0.00374723	0.00994383	-0.00181701	0.00363839	0.00499089	-0.00181121	0.0117821	0.00380825	-0.00434245	-0.00936442	0.00790286	-0.0163428	0.00354201	0.00652098	-0.00436468	-0.00381489	0.00290309	0.00938717	-0.00337772	0.00191236	-0.000869193	0.00777773	0.000607392	-0.000867887	0.00257256	0.00205338	-0.00506956	0.00119166	0.00903468	-0.000946291	-0.000825874	-0.00137174	-0.000420224	0.00140314	-0.00153766	0.000933111	-0.000973228	0.000509772
fBpby309	Southern British	0.0341306	0.0171138	-0.0202356	-0.0131707	-0.0066364	-0.0045172	0.000522886	-0.0352035	-0.0113109	0.00381871	0.00527595	0.00442498	-0.00748389	0.00199593	0.00300001	-0.00578074	0.010504	0.00920188	0.0104002	0.00124225	0.00563868	-0.00164519	-0.0111668	0.0141154	-0.00671267	0.00373471	-0.0054135	-0.0106946	0.00202017	0.00242385	-0.0067422	0.00327072	-0.00587247	9.48168e-05	-5.67579e-06	0.00139032	0.00108537	0.00355879	0.00389796	-0.00225881	0.00135074	-0.00613631	-0.00581102	0.00414814	0.00165322	0.00229151	0.0006018	0.000950443
fBpby322	Southern British	0.0349826	0.0163648	-0.00893533	0.000310321	-0.00263682	0.00307894	0.0123316	-0.0150404	-0.0325276	0.0185387	0.0120738	0.0118715	0.0210122	-0.00401076	0.00271702	-0.0051026	0.017215	-0.00542359	-0.00479475	-0.0164748	0.00114091	-0.00282503	0.00637998	-0.00269226	-0.00221709	-0.00379911	-0.00251054	-0.00111711	0.00271913	0.000508972	-0.0036366	-0.00673103	-0.00664419	0.00421047	-0.00624519	0.000314059	0.00413049	-0.00235824	-0.00440183	-0.000643772	-0.00544124	-8.6965e-05	0.00647775	-0.00185095	-0.00364465	-0.00288755	0.00123143	0.00264174
fBpby398	Southern British	-0.0304222	0.00109382	0.000454669	-0.0112689	-0.0117985	0.00799485	0.00177244	-0.00297663	-0.0239866	0.010536	-0.00164628	-0.00314468	0.00253727	-0.0102582	0.0165536	-0.00951437	0.0124508	0.00816277	0.00146325	0.00405477	-0.0132093	0.00628259	-0.00592413	0.00159524	-0.00211564	-0.00668786	0.0064854	0.00171837	0.000379343	-0.00151989	0.00316718	-0.00806261	0.00558084	0.000559009	-0.00511545	-9.35899e-05	-0.00555482	-0.00302221	0.00216273	-0.00278259	-0.00574032	-0.000728867	-0.00944898	-0.00580045	0.000952321	-0.00226812	-0.000513215	0.00241361
fBpby500	Southern British	-0.00497844	-0.0200083	-0.0183497	0.00276455	-0.0144739	-0.0141522	-0.0205402	-0.0146013	-0.0108719	0.0120666	-0.00514766	-0.014964	0.0188591	-0.00230535	-0.00916316	-0.0102403	0.00165456	0.00369012	-0.00802993	0.00724431	0.00142864	-0.010339	0.00320591	0.00672252	-0.00542608	0.0134273	0.00571984	-0.0113132	-0.00147602	0.00654231	0.0033385	0.0102699	-0.0040603	-0.00551237	-0.00222471	-0.00744305	0.00100619	0.00277416	-8.56422e-05	-0.00546708	0.0069288	-0.000411156	0.00158821	-0.000754902	-0.00117927	-0.00143077	0.0004554	0.000560223
fBpby566	Southern British	-0.000811177	-0.0226559	-0.0134404	-0.00535008	-0.0103848	0.00330174	-0.0134136	-0.00152383	-0.0279453	0.00138981	0.00652842	0.00589696	-0.00336356	0.00518167	-0.00350067	-0.00687949	-0.00485832	-0.00575083	0.0154964	0.00156749	-0.00764291	0.000166295	-0.00916206	-0.0103255	-0.00504262	-0.00622752	0.000583261	0.00181622	0.00502957	-0.00153798	-0.000619011	0.00694997	0.010364	0.00357889	0.0034518	0.00475863	-0.00354062	0.00290835	0.000271154	-0.00076792	0.0009205	0.00585847	0.00221554	0.00237777	-0.00151031	-0.00257249	-0.00306095	0.000612724
fBpby568	Southern British	-0.0102378	-0.00362549	0.000974386	-0.0253826	0.00806431	0.00372316	0.0104518	0.00713609	-0.00947301	-0.00923149	-0.0129929	-0.00369484	-0.00323263	0.00948354	-0.021648	0.017344	-0.00255159	-0.00231873	0.0124407	0.000713055	0.00241208	0.00365105	0.0109311	0.010767	-0.00135723	-0.00733932	0.00918976	0.00522379	0.00639848	-0.00513476	-0.00666005	0.00298275	0.00666951	-0.00263678	0.00809786	-0.00982598	-0.0012345	0.000199158	0.000206416	-0.00414812	0.00279581	-0.00454791	-0.000875195	-0.0010634	-0.00307985	-0.00164801	0.00440994	0.00138267
fBpby574	Southern British	0.00331636	0.00979807	-0.0118325	-0.0223825	0.00625472	0.00400659	-0.0146988	0.0251679	-0.0209144	-0.00316212	-0.0100499	-0.000881068	-0.0140535	-0.0104977	-0.0111485	-0.000572212	0.00455289	0.00191411	0.0119237	0.00507139	-0.00477236	0.00671963	0.0104544	-0.0130195	-0.010893	0.00370273	0.000695409	-0.00467033	-0.000875185	-0.00201735	0.00116902	0.00228802	-0.00451245	0.00478515	0.00128331	0.00345803	-0.00614015	-0.00667487	-0.00252284	-0.00562331	-0.00300389	-0.00445168	0.000320152	0.00084157	-0.00208934	0.00218588	-0.000411623	-0.00111163
fBpby625	Southern British	-0.00854236	-0.022223	0.0273267	0.0251301	-0.00990351	0.00126118	0.0111252	-0.00721668	-0.00887234	-0.013058	0.00135568	0.00114242	0.000782863	0.00100267	-0.00578736	-0.0114159	-0.00506354	0.00434394	0.000815802	0.006211	0.000198835	0.012279	-0.00217872	-0.00515888	-0.00548122	0.0023135	0.00796232	-0.00623046	0.00385834	0.00177668	-0.00133556	0.000940591	-0.00345526	-0.0031447	-0.00532632	0.00108666	0.0122091	4.00213e-06	0.0045433	-0.00329883	-6.98915e-05	0.00023196	-0.00143767	0.000917116	-0.00675994	-0.00483818	-0.000376042	-0.000797102
fBpby638	Southern British	0.0168767	-0.0170638	-0.0229742	0.00414633	-0.00294692	0.0182919	0.0174094	0.0430993	-0.00538145	-0.00772147	0.0109984	-0.0133219	-0.0131905	0.021241	0.0251116	0.000629234	0.00391678	0.00445856	-0.00397635	0.0012097	0.00918853	0.0028508	-0.00252855	0.0110482	-0.0177119	-0.00327257	0.002417	0.00257708	0.0108902	0.00621898	0.00306128	-4.93259e-05	0.005743	0.00247709	-0.00479447	-0.00499991	-0.000520206	-0.0027218	-0.00168564	-0.00239032	-0.00137593	0.0012378	9.17612e-05	0.00095461	-0.00113785	-0.000755322	0.0017656	-0.00332477
fBpby642	Southern British	-0.0127726	-0.0145105	-0.0167233	-0.00831057	-0.00704855	-0.0190409	0.0222161	-0.00112808	0.00300025	0.0262102	-0.00125919	-0.00448145	0.0103256	0.0133083	0.0032483	0.00660207	0.00470212	0.00878655	0.000514547	-0.00735334	-0.00313505	-0.00140847	-0.00451873	-0.00761272	-0.00207606	0.00141979	-0.00631547	-0.00333262	-0.00171602	0.00364006	-0.00465025	0.00185573	-0.000979249	-0.00430885	-0.00666668	-0.00442049	-0.00807312	0.00485813	0.00235199	-0.00197052	-0.00116725	-0.00166511	0.00116296	0.00241155	0.00395354	0.00375183	0.00353862	0.0030393
fBpby644	Southern British	0.0383459	0.027165	-0.0252197	-0.0137381	-0.00296351	0.00500729	0.0144376	-0.00177841	0.00504359	0.00293382	-0.00919733	0.00382934	0.0155376	0.00258344	-0.0074242	-0.00321542	-0.0123587	-0.0218001	-0.015869	0.0142784	-0.00602703	0.00634014	-0.00168996	-0.000133589	-0.00385706	0.0120306	-0.00467133	0.0049106	-0.00454923	0.00370149	0.00574683	-0.000176251	0.00681766	0.00609696	-0.00143324	-0.00138944	0.00272538	0.00299277	-8.27967e-05	-3.85218e-05	-0.00101882	-0.000880165	0.00102481	0.000412701	-0.00087371	0.00326591	0.00108627	0.00177651
fBpby654	Southern British	-0.000290703	-0.0141019	-0.000745223	0.0120028	0.00696649	0.00695938	-0.00126562	0.0259376	-0.00979512	0.00531599	-0.00634683	0.0178586	0.0119403	-0.0268296	0.00850289	0.00936806	0.0159607	-0.00824566	0.0064763	-0.00422897	0.00681862	0.00363477	-0.00737946	0.00389273	0.00895966	-0.00330401	-0.00258969	0.00697562	0.00223765	-0.00242333	-0.00428571	0.00279984	-0.000841928	4.22853e-05	0.00512823	0.0024154	0.00193332	-0.00517807	-0.00596313	-0.0038685	0.000452253	-0.000266791	-0.0028646	0.00110187	0.000154174	0.00133793	0.00181642	0.00108184
fBpby679	Southern British	0.0115137	-0.0515189	0.0243912	-0.0522769	0.0085098	0.02269	-0.0170874	0.0280189	-0.000686666	0.0151134	-0.0266985	-0.0048929	0.0129132	-0.00604259	-0.00659798	0.0153431	0.00312451	0.0159718	-0.0198498	-0.0107644	-0.0013073	-0.00727683	-0.0289069	0.00658284	0.00884547	0.00460387	-0.00755923	0.00689598	0.00329753	-0.00657349	0.00321944	0.00574189	-0.00426191	-0.00203943	-0.00320854	0.00471209	0.00634587	-0.00485862	-0.00402683	-0.00121771	0.00595549	-0.00211699	-0.00219071	-0.000547214	-0.000785397	-0.0025232	-0.000556689	-0.000138581
fBpby684	Southern British	-0.00217182	0.0207073	0.00989794	-0.0226426	-0.0348858	-0.00083304	0.0051373	-0.00586364	0.0118342	-0.014797	0.0082007	0.00305786	0.00851368	-0.0045627	-0.00125098	-0.00738103	0.020305	0.00956434	-0.0114864	0.0104358	-0.00687483	-0.0114036	0.00196446	0.000296348	-0.00585464	-0.0023751	-0.00453373	0.00903081	0.000197497	0.00432583	-0.00199537	0.00171373	0.000438957	0.00116042	0.00632129	-0.00650187	0.0047934	-0.000950286	-0.00657445	0.00415354	-0.000774676	-0.00116245	0.00188986	-0.00608018	-0.000288722	-0.000994948	-2.44906e-05	0.000233163
fBpby707	Southern British	0.0325835	0.00381583	0.0317195	-0.0112253	-0.0117413	-0.00224544	0.0194015	0.0111095	-0.0123921	0.0243925	-0.000121458	-0.0140511	-0.00419439	-0.0340976	0.00982286	0.0204512	0.00485793	-0.000894981	-0.00528112	-0.00109824	0.0078719	0.0124227	0.00221283	-0.003619	0.00202343	-0.00160683	-0.00655057	-0.00492991	-0.011429	0.0143359	0.000344362	0.00392768	0.0024503	-0.00665652	0.00504813	0.00120876	0.00714782	0.00629702	-0.00386241	0.00187279	-0.00223832	0.00382622	-0.002155	0.00197697	-0.00204774	-0.00253785	-0.00243138	-0.000777262
fBpby1004	Southern British	0.00346202	0.0045899	-0.0143867	0.00357552	-0.0290928	0.0198856	-0.00933581	0.00636907	-0.00325613	0.00787446	-0.00197949	0.000792943	0.0149278	-0.00292546	0.0101302	0.00626111	0.00234616	0.00224958	0.011926	0.0119845	-0.00223837	0.005878	0.00573742	0.00133109	0.0100367	0.0056569	0.00736808	-0.00152478	0.00512345	-0.00024099	0.00635269	-0.00712674	0.00253624	0.00265672	-0.00483327	-0.00269576	0.0032537	0.00178063	0.00533716	0.00867948	0.00235773	-0.00157567	0.00102981	-0.000698516	-0.00227167	-0.000790412	-0.000285651	0.00234459
fBpby1022	Southern British	0.0306802	-0.00823564	-0.017585	-0.0615792	0.0343203	0.0180207	0.0083312	-0.0264157	0.0140235	-0.0139651	0.00211792	-0.0169943	0.00285939	-0.00585422	-0.0104019	-0.0044437	0.0118743	0.00147116	0.00509713	-0.0050868	0.00394184	0.00869254	0.010919	0.0187163	0.00815863	-0.000856542	-0.0111728	0.00625275	-0.00239766	-0.00884714	0.00403597	0.00212576	0.00661174	0.00229781	-0.00236401	0.00534512	-0.00266174	0.00609161	-0.000682396	0.000430191	-0.000905446	0.00536516	0.00484019	0.00232057	-0.000602184	-0.000636807	0.00299756	-0.00168653
fBpby1030	Southern British	0.0568603	0.0296335	0.00726922	0.00375434	0.0388891	-0.00819655	-0.00907616	0.0104622	-0.00915	-0.00609381	0.00138092	-0.0083074	-0.0215628	-0.00488579	-0.0113481	-0.00371509	0.00142338	-0.00051233	-0.00203763	-0.000584581	0.00847032	0.00487508	-0.00984677	-0.00233505	-0.00168578	-0.000229908	-0.00195284	-0.00538031	0.000453349	0.00550354	-0.00287861	-0.00513446	0.00233587	0.00476099	0.000653767	0.000746464	-0.000362804	-0.000698502	0.00348095	0.0056097	0.000440553	-0.00128911	0.00103742	-0.000265621	0.00171751	-0.00542871	0.000486678	-0.00160034
fBpby1095	Southern British	0.00669539	0.0370868	0.000973324	-0.0112232	0.00610614	-0.02569	-0.0126124	-0.00513957	0.011388	-0.000396683	-0.0111706	-0.0116887	0.00614942	-0.0027408	0.00351226	-0.00362108	0.00895356	-0.00888023	-0.00319023	-0.00146649	-0.00871734	-0.00361381	0.000490682	0.00302464	0.00424767	0.00169184	0.00275244	-0.00694953	-0.00250027	-0.00466914	-0.00140005	-0.0103441	-0.00256236	-0.00165117	-0.000754275	0.001265	0.00467799	0.00415805	0.00398081	-0.00451251	-0.000557935	-0.000803545	-0.00480566	-0.00454387	0.000523702	-0.00234577	0.00467262	-0.00380603
fBiiro2904	Scottish and Irish	0.0132866	0.00460742	-0.00120048	0.018272	-0.00863187	0.01439	-0.00740705	-0.00900489	0.0139697	0.00916738	0.00756802	0.00583992	-0.00939633	-0.00509197	-0.00224768	-0.00251027	0.00759324	-0.0101996	0.00685385	0.00104358	0.00439267	0.00898831	0.0049083	0.000418351	0.00695673	-0.00745587	0.00503624	0.00280949	0.00150456	-0.00139607	-0.00267136	0.00533212	-0.00150609	-0.000723897	-0.00381098	0.00136928	0.00478057	-0.00825862	0.00037489	-0.00255515	0.00486349	0.00178949	0.00245492	-0.00179153	0.00361147	-0.00044755	0.000946438	0.00260297
fBiiro2337	Scottish and Irish	-0.00859326	0.00744725	-0.00614955	0.00462056	-0.0100807	-0.0259612	-0.0169604	-0.0255539	0.00920336	0.00809998	0.0015604	-0.00250261	-0.0253347	-0.00757558	-0.00290087	-0.00236388	0.000108961	-0.00479817	-0.00915114	-0.00591383	-0.0033406	0.015463	-0.0138074	0.00897047	-0.00892194	0.00511737	-0.00406656	0.00496073	0.000576662	-0.0125975	0.00383251	0.00310837	0.000458356	-0.00361554	-0.00190246	-0.010504	-0.00331277	-9.38324e-05	-0.00147717	0.000475264	-0.00203223	0.00495675	0.00140242	0.00316312	-0.00203695	0.00295162	-0.00376256	0.000848284
fBiiroAi	Scottish and Irish	0.003425	-0.0274533	-0.00805427	-0.0108468	0.0297926	-0.0114816	-0.0135635	-0.00513674	-0.00331196	-0.00701602	-0.000308105	-0.000990228	-0.00673276	-0.00190802	0.00390813	0.00869327	-0.0162544	0.0043089	0.00389075	0.00852059	-0.00369623	-0.00489177	-0.00151782	-0.00290181	0.0127294	-0.00646703	-0.00288817	0.00904402	-0.00170094	-0.00120883	-0.000680977	-0.00496962	-0.00517473	-0.00470568	0.000218623	0.00470351	0.00366213	-0.00404658	0.0104043	-0.00212599	-0.00475955	0.00109572	-0.00316322	0.00492922	0.00215138	-0.00362311	0.00285489	0.000268339
fBiiroCH	Scottish and Irish	-0.0125763	-0.0449637	-0.0136361	0.0496852	-0.0141663	-0.0149576	-0.0115664	-0.00677591	-0.0126462	-0.00843738	0.00409236	-0.00653377	-0.00782953	-0.007941	-0.000367091	0.00843923	0.00428458	-0.00070689	-0.000324699	0.00279021	-0.00293101	-0.00659945	-0.00309376	0.0127516	0.00747729	0.00205522	-0.00299075	-0.00328933	0.00174106	0.00427624	-0.00273565	-0.0126667	-0.000869337	-0.00281242	0.000946007	0.00597589	0.00392087	-0.000163383	-0.00100384	-0.000586059	0.00156065	0.00179971	0.00142148	-0.00129088	-0.00131806	0.00363827	0.00261393	0.00150857
fBiiro972	Scottish and Irish	0.0376488	0.0017857	-0.00965108	0.00983695	0.0254019	-0.0408064	0.00386884	0.0140036	0.00378195	0.00890727	0.0104617	-0.00242868	-0.0013805	0.0131711	-0.00737285	-0.00706329	-0.00281957	0.00350621	-0.0113432	0.00293331	-0.00262009	0.00625538	-0.00496961	-0.00141138	-0.00406391	-0.00443799	0.00324792	0.00508068	-0.00313745	-0.00732663	-0.00402456	0.00665054	-0.00323424	0.0033735	-0.00334233	0.00252679	0.00415633	-0.00586546	-0.0024511	0.00165748	-0.00625959	0.00321868	-0.000623096	0.00104468	-0.00603127	0.00189087	-0.00149616	-0.000948494
fBiiro977	Scottish and Irish	-0.0143078	0.0536533	0.00530412	-0.0125809	0.0325563	-0.0153884	0.00758146	-0.0021505	-0.000912374	0.00647866	0.00353988	0.0106104	-0.00459148	-0.00389561	0.00286813	0.00690705	0.00609373	-0.00631373	-0.0137114	-0.00652958	-0.003904	-0.00189419	-0.00178857	-0.00970801	0.00130793	-0.0062637	0.00785714	0.00132644	-0.00186584	0.00306486	-0.00494387	-0.00681577	0.00694927	-0.00291838	-9.77175e-05	7.91641e-05	-0.00649464	-0.00523885	-0.00257717	0.00263511	0.00256865	-0.000336384	0.00705345	0.00266705	0.00156234	0.000597763	0.00256265	-0.00113144
fBiiro2257	Scottish and Irish	0.0225562	0.034353	-0.0173754	0.0237867	-0.0273269	-0.00217045	-0.0082448	0.00830831	0.0112148	0.00405242	-0.00426454	-0.00900521	-0.00738773	0.0112422	-0.0234157	0.00605474	0.00942411	-0.00433601	0.00639436	-0.00290086	0.0116579	0.009539	-0.00920986	-0.00516964	-0.00292012	0.00864063	0.00829131	0.00112795	0.0011238	-0.00498518	0.00399575	-0.00294582	0.000640642	0.00155443	8.45365e-05	0.00913594	-0.000599521	0.00077269	0.00152393	0.0040107	0.0025037	0.000537492	-0.00637244	0.00129676	0.00109294	-0.00293903	-0.000650976	0.00127802
fBmdc64	Southern British	-0.00814768	0.00484612	0.0138801	0.0157217	0.00274077	-0.0101779	-0.01009	-0.000668715	-0.0306622	-0.000883378	0.000696903	0.00453848	-0.00042508	0.0131499	0.0122029	-0.000276746	0.0115497	-0.000261366	-0.00194149	0.00925067	-0.0019751	-0.00332369	0.00592032	0.00711254	0.00861443	0.00857311	0.000247606	0.00227388	0.00806892	-0.00585009	0.0013287	0.00474264	-0.000489178	0.000223056	0.00458663	0.00183611	-0.00434701	0.00107807	-0.00403878	0.000988151	0.000511072	-0.00337757	0.00625691	-7.39359e-05	0.00193553	-0.00541869	-0.00146671	4.44457e-05
fBmdc78	Southern British	0.0328216	0.0140997	0.0264264	0.0209852	0.0341137	0.0124571	-0.00358221	0.0202455	0.01307	-0.0115257	0.0140512	-0.00453568	0.00423154	0.00314826	0.0136777	0.0035968	0.000737223	-0.00693119	0.00601932	-0.000128288	0.00544868	-0.00412988	0.00674309	-0.000533748	0.00378866	0.00966339	0.000984061	0.0047446	0.000385903	-0.000840384	0.00573886	-0.00255164	-0.00951487	-0.00290403	0.00434575	-0.00550445	-0.00572943	0.00412922	-0.00385088	-0.00315678	-0.00405997	0.00117519	-0.00539451	-0.00130298	0.0016062	-0.00201073	-0.00013289	0.00395697
fBmdc101	Southern British	0.0154647	0.00137882	-0.0125809	0.00388997	0.00659564	-0.0197631	-0.00310936	-0.0111101	-0.00988802	-0.0130736	0.00651992	0.0113447	0.0103154	0.00444472	-0.000704813	0.0159045	-0.0102034	-0.00706181	0.0075971	-0.00382672	0.00939529	-0.0159393	0.0018895	-0.00359609	-0.00218778	-0.0014344	-0.00433968	-0.00204581	-0.000177629	-0.00797751	0.00224384	0.0020391	-0.00725138	2.28888e-05	-0.00115001	-0.00905878	0.00163909	0.00216641	-0.00686006	0.00620132	0.00135787	-0.000914797	-0.00239357	0.000329209	0.00128155	-0.00288249	-0.00310073	0.000354296
fBmdc61	Southern British	0.0149738	-0.0193897	-0.0196786	0.0215264	0.0200155	0.0120208	-0.0268666	-0.00588232	-0.0226048	-0.00542848	0.000354449	-0.00314097	0.00858815	-0.0134646	0.00774434	-0.00821872	-0.00882097	-0.020248	0.00444604	0.00186366	0.00883184	0.00292274	0.00237423	0.00713815	-0.00714515	0.00437234	0.000735405	-0.00672761	5.937e-05	-0.00177567	0.00293199	-0.00566344	-0.000255573	0.00157231	-0.00546393	0.00386162	0.00343267	-0.000542204	-0.00228142	-0.00309002	0.00587384	-0.000889476	0.00376579	0.00253026	0.000137928	0.00370963	0.000426511	0.00275536
fBmdc62	Southern British	-0.0295185	0.0168533	-0.00102093	0.0133902	0.0125744	-0.026146	0.0106205	0.00676353	-0.00423525	-0.00400815	0.00947382	-0.0360018	0.0093761	-0.00555671	0.0180024	-0.00245874	-0.00450202	-0.00173784	0.017358	0.00889281	-0.0181855	-0.00653536	-0.0136785	0.00324418	0.000265958	2.77086e-05	0.0038376	0.00227824	0.000243233	0.00131435	-0.00595181	0.00171546	-0.00220567	0.000231795	-0.00145076	0.00374508	-0.00152459	-0.00385035	0.000872091	0.00158374	0.00210583	0.000692707	0.00416571	0.00347735	0.00143635	-0.00221132	-0.00376011	-0.000357328
fBmdc115	Southern British	-0.0255338	-0.00180149	-0.00464175	0.0234948	-0.0103598	-0.0189766	0.00852327	-0.00750222	0.00713265	0.0038772	-0.00339118	-0.000392746	0.00668336	0.00327883	0.00371577	-0.0142757	0.00310817	-0.00305775	-0.0139316	-0.00512866	0.00324054	-0.00916449	0.00533682	-0.00306647	0.00721623	-0.00474841	-0.00709114	-0.00404019	-0.00240126	-0.00823226	-0.00482594	-0.000261851	-0.00182667	-0.00425479	0.00744736	9.01303e-05	0.00096502	0.0022579	-0.00145542	-0.00408366	-0.000672908	0.000778751	-0.000809146	0.000938478	0.00245021	0.000141102	0.000815519	-0.00105464
fBiirbf	Southern British	0.0196499	-0.00898801	0.0190772	-0.0225741	0.00238174	-0.0049501	-6.8146e-06	0.00865574	0.00513809	0.00208634	-0.00874223	0.00448661	-0.00851594	-0.000185067	-0.00277157	0.00662462	-0.000151735	-0.00124337	-0.000350456	0.0163505	-0.00366654	0.00336253	0.00468288	0.00632027	0.00221611	-0.00937574	0.0106515	0.0045402	-0.00743582	0.00377832	1.31873e-05	-0.00606217	-0.00787589	-0.00429763	0.00175811	-0.00570501	-0.00821576	-0.0021503	-0.00543937	-0.00092301	-0.00200909	0.00317691	-0.00110462	0.00490472	0.000696559	-0.00119674	0.00217269	-8.2893e-05
fBiirCH15	Southern British	0.0210033	-0.0164822	-0.0291916	-0.0288095	-0.00135943	-0.0206108	8.12905e-06	-0.00395356	-0.00239921	-0.00641715	0.0215398	0.00299674	-0.0113263	0.0143929	-0.00884572	0.0233398	-0.010323	0.00746087	-0.00452891	-0.00181033	-0.00358621	0.00312285	0.00707175	0.00641762	0.00179636	0.00197096	0.00454864	-0.00156998	-0.00795013	-0.00500062	-4.27326e-06	-0.00714221	-0.000427033	-0.0110539	-0.00599492	-0.000333159	-0.0018706	0.00145964	-0.0073182	0.00234468	-0.000830606	-0.00354008	-0.000416803	-0.00485661	-0.000932642	-0.00135302	-0.00344531	-0.000640864
fBmdc75	Southern British	0.0349883	0.0282679	-0.0183552	-0.000853101	0.0213897	-0.0159482	-0.0189774	-0.0105964	-0.000108835	-0.00223699	-0.0369097	-0.0161852	-0.00583572	-0.00421776	0.00665718	-0.00549166	-0.0105718	-0.0023788	-0.0117265	0.0174031	0.00190932	0.00889142	-0.00353732	-0.0115139	0.000295673	-0.00537067	-0.00519857	0.00664177	-0.000126135	-0.00542399	0.0021927	-0.00985654	-0.00320047	0.0013776	0.00331496	-0.00315156	0.000593331	0.00373798	0.000409898	0.000879998	0.00487419	0.00167311	0.00205491	0.00051674	-0.0028594	0.00143716	-0.000404324	-0.000138346
fBmdc76	Southern British	-0.0135957	-0.0231151	-0.0116011	-0.00646148	0.00274372	-0.000884277	0.00435804	-0.00500113	-0.00696786	0.00156387	-0.0273466	0.015088	-0.00724153	-0.00573116	-0.0172939	0.000280001	0.000662373	-0.00396475	-0.0095811	-0.0123927	-0.0279677	0.000293936	0.0109638	-0.000619345	-0.01176	0.00195252	-0.000777395	-0.00412295	0.00896035	-0.00373069	0.00225005	-0.00189433	-0.00072622	-0.00027466	0.000523579	0.000360307	-0.00308606	0.00282418	0.00375817	-0.00178396	-0.00249221	0.0012506	-0.00118167	9.53616e-05	0.00268624	1.28959e-05	-0.00309279	0.00120273
fBmdc77	Southern British	0.0233357	-0.00915563	-0.0114744	-0.0398202	-0.0390218	-0.00942031	-0.0128869	0.0211134	0.0106561	0.00160548	0.0057082	0.0214849	0.0165247	0.0150228	-0.00965494	0.00430696	0.0141427	-0.00573815	0.00739123	0.00554507	-0.00139602	-0.00234276	-0.0024008	0.000697794	-0.000842255	-0.00743022	-0.00325775	-0.00545796	-0.0104822	-0.00148521	-0.00108479	-0.00383266	0.00495064	-0.00778486	5.52403e-05	0.00211679	0.00423165	-0.0020304	0.0023149	-0.00303815	-0.00132221	0.00270835	0.00457622	0.00180241	0.00347703	0.000162698	-0.0014462	-0.00075569
fBmdc79	Southern British	0.0247038	-0.024814	0.047933	-0.00889243	0.0168851	0.00706174	-0.0100112	-0.0126976	0.0144057	-0.00848163	0.00351381	-0.00236076	0.0148434	-0.016444	0.0244775	-0.00278396	0.00305051	-0.0147839	0.00310005	-0.0187003	0.00533601	-0.00225088	0.00744651	-0.00369897	-0.010801	0.00358769	0.00374217	-0.00104559	0.0133297	-0.00446459	-0.00633679	0.000541112	0.00569138	-0.0052894	-0.00232029	-0.00183179	0.000126567	-0.00288064	-0.00188239	0.00439778	0.00149715	-0.00178657	-0.00103583	0.00197141	0.000555361	0.000917303	0.00112551	-0.00123435
fBmdc99	Southern British	0.0159711	-0.0188991	0.0391143	0.0169903	-0.0097979	-0.0409278	-0.0194116	0.0105722	-0.00836799	0.0314276	-0.00367096	0.0092812	-0.00602782	0.00993501	0.00631872	-0.00101584	0.0078904	-0.00208128	0.00252315	-2.35781e-05	0.00219195	0.00525767	-0.00503891	0.00317686	-0.00334314	0.00300362	0.00175877	0.00522063	0.000226874	0.00177442	-0.00567	-0.00372712	-0.000792128	-0.00249858	0.0014737	-0.00494411	-0.00338853	0.00223209	0.00385347	-0.00325418	0.00461879	0.00374909	-0.00124638	-0.00271599	0.00511734	0.00199572	-0.00059957	-0.00038247
fBmdc60	Southern British	-0.0301403	0.0176839	-0.0144203	0.0176632	-0.0311594	-0.00726062	-0.0126389	0.00467398	0.000165762	-0.0072437	0.00329531	-0.00332833	-0.00692097	-0.0137772	0.0125416	0.0106236	0.00792389	-0.0066415	0.00196074	-0.00541463	-0.00395829	-0.00865333	0.00313014	0.00884166	-0.011318	-0.00229455	-0.0037626	0.00408101	-0.00423758	0.00159645	0.00822722	-0.00280218	-0.0033443	0.000117669	-0.00733235	0.00117667	-0.00363055	-0.00249447	-0.000591682	-0.00174946	0.00149128	-0.000706322	-0.00138623	0.00221754	-0.00565479	-0.00216572	0.00216305	0.00122253
fBmdc89	Southern British	-0.0668644	-0.0156582	-0.0142081	-0.00714604	0.00119452	0.0239093	-0.00790754	0.00579566	-0.00877621	-0.00815351	-0.00266858	0.00653123	-0.00380839	0.0041598	0.000665113	0.0101319	-0.00598057	0.00406767	-0.00166073	0.00416172	0.00440402	0.00531001	0.00485903	-0.00760095	-0.00652815	0.00528795	-0.00331863	-0.00112345	0.00445696	0.000529415	-0.00585123	0.00349275	-0.00999294	0.00202715	-0.00134177	0.0042598	-0.000547766	0.0040444	0.00140673	0.00147774	0.00132673	0.00414739	5.97435e-05	-0.00592223	-0.00039313	-0.000726602	0.000176411	-0.00358187
fBpby31	Southern British	0.0100512	0.00848968	-0.00991868	0.0175695	-0.0210916	-0.000649115	0.00769003	-0.00541299	-0.00875822	0.00464692	-0.00183187	0.00309757	-0.00718966	-0.00310222	-0.00079561	-0.0118506	0.00519829	-0.00323801	-0.00189444	0.0116971	-0.00154812	0.000872757	-1.44441e-05	-0.00102804	0.000182972	-0.00704583	0.000729029	-0.00155486	0.00391186	-0.0077318	-0.009553	0.00476835	0.00595941	-0.00243668	0.00466361	-0.000972109	-0.00175223	7.73821e-05	-0.00308465	0.0102117	0.00415071	-0.00331365	-0.00483657	0.0036206	-0.00291853	-0.000728155	0.00210275	0.000209228
fBpby103	Southern British	0.0113392	0.00885793	0.0112119	-0.00010721	-0.0173928	0.0113211	-0.00922099	-0.01719	0.00148531	-0.000751095	0.000344252	-0.0012584	-0.00181271	0.00727252	0.00628974	0.0145708	0.00289457	-0.0101633	-0.00335116	-0.00215902	0.0030757	-0.00279394	0.00770731	0.00991371	0.00144958	7.1674e-05	0.000572709	-0.0100063	-0.000407579	-0.00729906	-0.000742553	0.00106617	0.00145554	0.000349757	0.00539313	0.00543957	0.000197601	-0.0051961	0.0032315	0.00239289	-0.00567377	0.00122244	-0.00133387	0.00300783	0.00203883	0.0024994	-0.0012977	-0.00564185
fBpby121	Southern British	0.0477062	-0.00177942	-0.034781	-0.0163432	-0.0298352	0.00186881	-0.0195933	0.0162555	0.019105	-0.0221607	-0.00895641	-0.0037139	-0.00731739	-0.00831339	0.0124633	-0.00583338	-0.00445728	-0.00062271	-0.00646802	-0.00660177	-4.37809e-05	-0.0148713	-0.0106212	-0.00531257	0.00192915	0.00543938	0.00665888	-0.00785758	-0.00147615	-0.00134943	-0.00247941	0.00228208	0.00072175	0.00483874	-0.000339112	0.00152184	-0.00326931	0.000516525	0.00395288	0.00358863	-0.00469692	0.00702962	0.00251566	-0.00126123	-0.00335858	-1.76871e-05	0.00286011	-0.000449414
fBpby305	Southern British	-0.0253894	0.0310727	0.00564852	-0.00882436	0.0146069	-0.0080349	-0.0167811	0.0086287	-0.0096761	-0.000942486	-0.000515607	0.0120175	-0.015434	-0.00625	-0.000982655	0.000731123	0.00833688	0.0131754	0.00293309	0.00466853	-0.00793841	0.00024031	0.00893698	-0.00202956	0.00383752	0.0126333	-0.00203718	-0.00130721	0.00173365	0.00633247	-7.30136e-07	-0.0129469	-0.00313254	-0.0021683	0.00253314	0.00577266	0.000119511	0.00179584	-0.00491882	0.00479899	0.00344246	0.00119913	0.000634496	0.00313796	-0.00374197	0.00237413	-0.00204695	0.00147924
fBpby385	Southern British	-0.00963296	-0.0118741	-0.0185783	-0.00869082	-0.0256567	0.0251126	-0.00718936	-0.00688976	0.00674922	-0.00753586	-0.0174038	-0.0187845	-0.0109584	0.00504394	-0.00319316	-0.00274833	0.000529647	-0.0120322	-0.00281636	0.00341158	-0.00116887	-0.0115702	0.000539272	-0.00368452	-0.00101548	-0.000376392	0.00337828	-0.00258213	-0.00248002	0.00353084	-0.0133358	-0.000653209	-0.000541327	-0.00169431	-0.00999185	-0.0106229	0.001143	-0.00378194	0.00178206	-0.00105568	0.00135802	0.00312833	-0.000112522	-0.00147078	0.00140467	0.00173185	-0.00176312	-0.0034747
fBpby515	Southern British	-0.00735659	0.00868643	0.0245598	-0.0529498	-0.041662	-0.000770352	-0.0179989	-0.000741745	0.00372578	0.00651718	-0.00385248	-0.0243401	0.00284695	0.0091664	0.0116085	-0.0125201	-0.00668988	-0.00077785	-0.0050539	-0.0049034	0.00236411	-0.000196743	0.00576303	0.00399337	0.00388161	0.00803904	0.00325497	0.000182356	0.00364897	-0.000787596	0.0070153	-0.00446355	-0.00212811	0.00817928	0.00249698	-0.00225645	0.000497548	-0.00318563	1.0043e-05	0.000643853	-0.00109788	0.00130826	-0.00311457	0.00234424	0.0014205	0.00113047	0.00297705	-0.000327029
fBpbyhgr352	Southern British	-0.00994061	0.00235033	0.0197569	-0.0342696	-0.0229141	-0.0134131	0.0258095	0.00978786	-0.0115025	-0.0409538	-0.0240627	0.0118273	-0.00734844	0.0220108	0.011328	0.0166532	-0.00432027	-0.0155586	0.0036601	-0.0108986	-0.00459553	0.00389902	-0.00563318	0.00102944	0.00833381	-0.00521158	-0.00370601	-0.00605032	0.000509455	0.00799473	0.013353	0.000347004	0.00236188	0.00758742	0.00073266	-0.00594191	0.00165291	0.00128677	-0.00155781	-0.00256794	0.00748406	-0.0013262	8.92765e-05	0.00137118	0.00115149	-0.00129704	-0.00116964	0.0011052
fBpbyhgr1519	Southern British	-0.00267416	0.0263469	0.0419487	0.0137438	-0.0440208	-0.0167728	0.0246789	-0.0030788	0.00345572	-0.00694097	0.00582489	0.0101191	-0.0022028	-0.0218036	0.00166544	0.00850747	-0.0102267	-0.00136809	-0.000433082	-0.00410416	0.00359638	0.00290562	0.00790388	0.00192264	0.00492805	0.010313	-0.0102502	0.00441607	0.00204515	-0.000865768	-0.00643502	0.00273947	-0.00063993	0.00778388	-0.00817433	-0.000409271	-0.00342433	0.00235607	0.000677456	0.00245545	0.000861365	-0.00368001	-0.0022827	0.00235928	0.00221433	7.09111e-05	-0.000536647	-0.00468461
fBSbrt6	Scottish and Irish	0.00805285	-0.0132785	-0.0123025	0.000927935	-0.0356707	-0.0254872	0.0246725	-0.0119326	-0.00203021	-0.0190985	-0.00938595	-0.0129552	-0.0220666	-0.00107243	-0.00488502	0.0125478	0.0067355	-0.0081836	-0.0040865	0.0050594	0.00728782	-0.00354468	-0.00321767	0.00401254	0.00615779	-4.65905e-05	0.00222494	0.00280202	0.00778145	0.0113555	-0.00324842	0.00370785	-0.00643878	-0.00309376	0.00259736	0.00798569	-0.00295316	-0.0022655	0.00398479	0.00447512	-0.00126792	0.00159185	0.00498586	-0.00302167	2.91619e-05	-0.00191089	-0.00200028	0.000879574
fBSbrD2	Scottish and Irish	0.0314565	-0.0357168	-0.00176965	-0.0165516	0.00101986	-0.0227421	-0.0171497	0.0102154	0.0359422	0.0101037	-0.000942222	-0.00853535	0.0120022	2.8713e-05	0.0135783	2.56575e-05	0.0024168	0.00145421	0.00776272	0.00402957	-0.0035046	-0.00402532	0.0152742	0.00213682	-0.00415154	-0.00611938	-0.00750438	-0.00565243	-0.00496304	0.00343054	-0.00541562	0.00280742	-0.00233848	0.0102004	0.00860758	0.00104028	0.000271665	-0.00133736	0.00324782	0.00131495	0.00537617	-0.000429786	0.000766074	0.000840871	-0.00319214	-0.00276541	-0.00425129	-0.00109826
fBSbrOMW	Scottish and Irish	0.00299154	-0.0200669	-0.00765857	0.00432872	-0.0177751	0.0233101	-0.0179669	0.00130856	-0.00465696	0.000341236	-0.0120701	-0.012688	-0.0168146	0.0246354	0.0118162	0.00772265	-0.00232823	-0.0042556	0.011289	-0.00806905	0.00731492	0.00592101	0.00521699	-0.0171828	0.00775073	0.00984529	-0.00443184	0.00232228	0.000256688	-0.00246556	-0.00105312	0.00179724	-0.00408828	-0.0127751	0.00441896	-0.00133616	0.00182984	0.000813336	0.000423368	0.00157067	-0.00438547	-0.00180105	0.00285194	-0.00130265	-0.00187629	0.0041946	-0.00122101	0.000942591

## Sheet: Males
Id	pop	PC1	PC2	PC3	PC4	PC5	PC6	PC7	PC8	PC9	PC10	PC11	PC12	PC13	PC14	PC15	PC16	PC17	PC18	PC19	PC20	PC21	PC22	PC23	PC24	PC25	PC26	PC27	PC28	PC29	PC30	PC31	PC32	PC33	PC34	PC35	PC36	PC37	PC38	PC39	PC40	PC41	PC42	PC43	PC44	PC45	PC46	PC47	PC48
mIhsm39	Iceland	-0.00819394	0.00047377	0.0131111	-0.0384941	-0.020833	0.000784572	0.0141236	-0.0134796	0.00562181	0.0144249	-0.00801205	0.019135	0.0155255	-0.00503665	0.0110822	0.00898351	-0.00509264	0.0069141	0.0019674	0.00625049	0.0161518	0.0017009	0.00236741	0.00984049	-0.0126963	0.00153895	0.00347295	-0.000374005	0.000546879	-0.00422108	0.0117598	-0.000817133	0.00356477	-0.00124844	-0.00251737	-0.00293887	0.00362157	-0.00660791	-0.00532599	-0.00252169	0.00250675	0.00194588	0.000828095	0.000785752	0.00397094	-0.00140301	-0.00105802	-0.00279515
mIhsm54	Iceland	0.00202082	-0.00193808	0.00558396	-0.0661193	0.0388293	0.0182814	-0.0110932	-0.0215894	0.0259188	0.0591659	0.00822966	-0.000499506	-0.0171783	-0.0303619	-0.00374697	0.0193965	-0.0243823	0.000482296	-0.0042366	0.00172448	0.0113848	0.000543688	-0.0107328	0.00925987	0.0105788	0.0118407	-0.00119389	-0.00735623	-0.00363901	-0.00237043	-0.0159845	-0.00446757	-0.00261388	0.00149031	-0.00580901	-0.000910163	-0.00107583	5.30454e-05	0.00889749	0.00380685	-0.000640871	0.00359436	-0.00618989	-0.00423036	0.00308839	-0.0018465	-0.00217153	0.00160642
mIhsmA9	Iceland	-0.0143334	-0.0348297	-0.0578569	-0.0130076	-0.00623589	0.015295	-0.00594948	0.025746	0.0231276	0.000810825	-0.0154152	-0.0231394	0.0199158	0.0169705	-0.000922962	-0.0242905	-0.0343201	0.0234352	-0.00281469	-0.00568854	0.00345157	-0.00789328	0.0136651	0.000133794	0.0112517	0.00658217	-0.00234225	0.00534863	-0.00491718	-0.00182518	0.00746054	0.00181088	-0.000671305	-0.00551697	0.000373585	-0.00246248	-0.00601243	0.002291	0.00379132	-0.0015283	0.000120418	-0.00105889	-0.00531471	0.00195076	-0.00537061	-0.00319342	0.000103041	-0.00222778
mIkel11	Iceland	0.0362383	-0.023302	0.0459866	-0.0367928	-0.0607164	-0.0099176	0.0166984	-0.0165253	-0.000334606	-0.0102552	-0.0159247	0.0113824	0.00902808	0.00447829	0.000673471	-0.0139514	-0.00724066	0.00429522	-0.0206609	-0.0007254	0.00256044	-0.0184359	0.0137726	0.00197931	-0.00566151	-0.00699401	-0.00119754	-0.00748167	-0.00744132	-0.00238053	-0.0111656	-0.00497989	0.0106446	-0.00831965	0.00673537	-0.00246578	-0.00554193	0.00259608	0.000581479	0.00566468	-0.000295719	-0.00379575	-0.000681657	0.00518551	0.0017757	0.00145874	0.00184496	0.0013816
mIkelcom	Iceland	0.00261615	-0.0203809	-0.00635244	0.0187201	0.0227471	-0.00127962	0.0070123	0.00153066	-0.000916657	-0.00417341	0.00627987	-0.0243259	-0.00810871	0.00669627	0.00752426	-0.00853816	0.0050721	-0.00946416	0.0122495	0.00643716	0.00180657	0.00167166	0.00158952	-0.00539402	0.00776637	0.00390494	0.0152487	-0.00569594	-0.0104665	0.00397044	0.00261832	-0.00674783	-0.00541801	-0.0070784	0.00470133	-0.00590983	0.00432902	-0.000870747	0.00226085	6.96551e-05	0.00168769	0.000601775	0.00477138	0.000220167	0.000218521	0.00586373	-0.00151385	0.00135535
mIkelM1	Iceland	-0.0035345	0.00851744	0.00611119	-0.0446657	-0.0139074	0.0115003	-0.0261368	0.00134039	0.00795892	-0.00968653	0.00990649	-0.0112099	0.00990369	0.00305083	0.0124603	-0.0048197	-0.00980871	0.0100778	0.0062204	-0.00013842	-0.000731535	0.00127375	0.00217248	0.0065031	-0.0133997	-0.00600705	-0.0152058	0.00117729	-0.000466455	0.00351922	-0.00780406	-0.00464932	6.79584e-06	-0.00550837	-0.00538997	-0.00444971	0.000409025	0.00231964	0.0058586	-0.00619325	-0.00463869	0.000496691	0.00412888	-0.0046255	-0.00779766	-0.00367374	0.00165247	0.00293627
mIkelS1	Iceland	-0.0147062	-0.00574618	-0.0261916	0.0127862	-0.00467439	-0.0102311	-0.00198796	-0.00460581	0.0091784	0.0227022	0.000103665	-0.016132	0.00135911	0.00193388	0.00890742	0.00683832	0.00454601	-0.00984039	0.00690662	0.00256838	-0.00245536	0.00857285	0.00497727	-0.005345	0.014986	-0.00441774	-0.000868905	0.00706465	-0.00767756	-0.00138591	-0.00385301	-0.0012882	-0.00371461	0.00412027	0.000949385	-0.00168838	0.000150072	0.000652939	-0.0109891	0.000532698	-0.00302519	-0.00437184	0.00125075	0.001674	0.00311064	2.32128e-05	0.00555929	0.00240841
mIkelS6	Iceland	-0.0117277	-0.000488915	0.00207494	-0.00718733	-0.000226418	-0.0348168	0.0133942	0.0130487	-0.00763072	0.017991	0.000132673	0.00379979	-0.00516456	-0.00580871	0.00165423	0.00462689	0.00272727	-0.0107942	0.0132316	0.0166721	-0.00894991	0.00362606	0.00179778	-0.000771016	-0.00700317	0.00212248	-0.000349235	-0.00456521	-0.0149079	-0.00848214	-0.00465521	-0.00446417	0.0117098	-0.00080749	0.00828438	-0.00135775	0.00246094	-0.000459067	-0.00355117	-0.00147146	-0.00601842	0.00356379	-0.00193468	-0.000515891	0.00262011	-0.000517225	0.00273008	-0.0008898
mIhsm8	Iceland	-0.0112587	0.0317496	-0.00933472	0.012881	-0.00624458	0.0356959	0.0193651	-0.00937698	-0.00754964	-0.0144114	0.00573647	-0.00118286	-0.00713411	0.00686103	-0.000514142	-0.000324377	-0.00475936	-0.00339533	-0.00369336	-0.00501496	-0.00433195	0.00122612	-0.0105862	0.00295482	-0.00127845	-0.00773122	0.00187367	-0.0118532	-0.00408753	-0.0074984	-0.00161132	0.0038982	-0.00165764	-0.00611493	-0.00111498	-0.00387617	0.000812028	-0.00248295	-0.00172345	-0.00298773	0.000828201	0.00103917	0.000133537	-0.00201118	0.000600742	-0.00188628	-0.00531304	1.46347e-05
mIhsm17	Iceland	0.0110408	-0.00427523	0.00551879	-0.00548974	-0.0185112	0.0102342	-0.0198314	0.00223465	0.0212191	0.00827802	0.00299458	-0.00159443	-0.00245366	-0.00969149	0.0081285	0.00164941	0.00630791	0.00643261	0.000998338	-0.00403485	-0.00110533	0.0161765	0.00538388	0.00379016	0.00896553	1.45752e-05	0.00925485	0.00257967	-0.00449329	-0.000610516	-0.000461451	-0.00183105	-0.00386933	0.00492574	0.000644263	-0.00375056	0.0068606	-0.00481361	0.00253904	-0.0038491	0.00212056	0.000198182	-0.00132707	0.00213999	0.000547559	0.00301768	-0.000615778	0.000827541
mIhsm20	Iceland	-0.0162286	0.0177246	0.00109566	0.00463247	-0.0139558	0.00330018	-0.002093	-0.0119771	-0.0011679	-0.00461927	-0.0100619	-0.00674139	0.00818619	-0.0080379	-0.00429357	-0.00140668	0.0133187	-0.0118039	-0.000508369	0.0099723	-5.73072e-05	0.00920247	0.00262535	-0.00237846	-0.00628095	0.00358334	0.00104322	0.00623239	0.00342112	-0.000219605	-0.00722479	-0.00307744	-0.00307808	0.00316901	-0.000212328	-0.000160127	-0.00372902	0.00513075	-0.000111577	0.00223258	0.0039505	0.000978743	-0.00329051	0.00378625	0.00317674	0.000148321	-0.00346265	0.000444207
mIhsm45	Iceland	0.00254149	-0.00961705	-0.0204528	-0.000586018	0.0423567	0.0320901	0.0319711	-0.0229201	0.0360938	0.0167647	-0.00836477	-0.00654982	0.0064136	-0.00593864	0.004613	-0.0175559	0.0106987	0.000364911	0.0112895	0.0131624	-0.00327944	-0.00738376	-0.00554925	-0.00824533	-0.00882147	-0.000250184	-0.00441948	-0.00121187	0.00653745	0.00116366	0.00498252	0.00201595	-0.00115012	0.00191963	-0.00829986	0.00121041	8.97099e-05	0.00220151	0.00497337	-0.000783248	-0.000596561	-0.000430516	0.00400369	0.00452809	0.00270224	9.44456e-05	0.0029516	0.000345887
mIhsm47	Iceland	0.0122429	0.0236071	-0.0132329	0.00900615	0.009257	-0.00167594	0.0150324	0.00101354	0.0103545	-0.0124772	0.000295474	0.00277805	-0.00761033	-0.0167245	-0.00393374	-0.00893315	0.00500881	0.00265929	0.00436242	-0.000818788	0.000709107	-0.00840578	0.00327831	-0.00886037	0.0027965	-0.00956545	0.000898641	0.000368544	-0.00594509	-0.00671429	-0.000780653	0.0036848	0.00319291	0.00159393	-0.00545363	0.00374944	-0.00639068	-0.00367534	0.00582192	-0.00759456	0.00498925	0.000695112	-0.00111937	-0.000412096	0.00123211	0.000243921	-0.00125711	-0.000997905
mIhsm51	Iceland	0.00843818	0.0160638	0.0118498	-0.0272139	0.0834398	-0.00506578	0.0230223	-0.00450026	0.0115731	0.00819997	0.00342011	0.00376542	0.0317871	0.0164056	-0.00885874	-0.0044463	-0.0123471	0.00853027	0.00217911	0.00132214	0.00606963	-0.0095769	0.00449808	-0.00769621	-0.00980889	0.0004709	-0.00495562	0.00351765	-0.00502151	-0.00583082	-0.00804286	-0.00215535	0.000876177	0.0104735	0.00783293	0.0111858	0.00247867	-0.0055481	-0.00500245	-0.00240218	0.000398445	-0.0066517	-0.00356816	0.00129927	-0.00296277	-0.00261842	0.00228733	-0.000920895
mIhsm53	Iceland	-0.0124298	0.000738745	-0.0106558	-0.0286451	-0.00419875	-0.00100261	0.0106321	-0.0154489	-0.0103329	-0.00431464	0.0134809	-0.0154332	0.00342224	-0.000484735	0.00290608	-0.00797278	0.00726173	0.00604174	0.000952759	-0.00757656	0.0143652	-0.00739485	0.00356323	0.00205094	0.00459167	0.0037235	-0.000557271	-0.00700315	0.00161203	-0.000400907	-0.00273025	0.00312506	-0.00195379	-0.00797692	-0.00336933	-0.00165447	0.00567461	0.00571388	-0.00419186	-0.00619363	-0.00187354	-0.000300982	0.00140387	-0.00248946	0.00245375	-0.00252102	0.000672817	0.00144321
mIhsm57	Iceland	0.0230072	0.0144514	0.0324146	-0.0092343	0.0106418	-0.00418244	0.0244714	0.0132055	-0.00650862	-0.00447132	-0.00522611	0.00985384	-0.0129163	-0.0249679	-0.00371343	-0.0236317	0.00197956	-0.0110565	0.00235598	-0.0076944	0.0111497	0.00367621	0.00414687	-0.00742103	0.00928269	0.00168982	-0.00140841	0.00932083	-0.00064635	-0.00137119	-0.000330427	-0.00277582	0.00513931	-0.00088927	-0.000133023	0.00314977	-0.0111846	0.000959947	0.000133818	-0.00501419	-0.00205787	0.000771737	0.000542724	0.00170489	-0.00209438	0.0008012	0.000288603	0.000468398
mIhsm65	Iceland	-0.0231203	0.000142485	-0.0258771	0.0196544	-0.0129094	-4.16425e-05	-0.0146259	-0.00516865	0.0121128	0.00383328	-0.00453723	-0.00583964	0.0029585	-0.00252163	0.0114422	0.0129095	-0.00276693	9.86516e-05	0.000105932	-0.00365933	-0.00236609	-0.0123621	-0.00864515	0.0098486	0.0051664	0.00565481	0.00335913	-0.00515774	-0.00830284	-0.00556804	0.00229968	0.00238773	0.00322796	0.000902753	0.00300751	0.00578646	-0.00553186	0.00678317	-0.000319132	0.00524171	-0.00137257	0.00335766	-0.00578388	-0.0017137	0.00407162	0.00319262	0.00117764	-0.00223642
mIhsm76	Iceland	-0.0401462	0.0032242	0.00548455	-0.004926	0.00663298	0.0268996	-0.0243182	-0.00161578	-0.00744558	-0.00379556	0.00237373	0.0169001	0.0102405	-0.0023852	0.0116856	-0.00522454	-0.00860201	-0.0168472	-3.08876e-05	0.00374479	-0.000800382	-0.000175765	-0.000391276	0.00266887	-0.00414864	-0.00237748	0.00489407	-0.012279	0.000597748	-8.45185e-05	0.00349699	0.000625698	0.00133965	-0.00076515	0.00368111	-0.0077974	-0.00333019	7.06713e-05	0.00520565	-0.00485237	-0.000458555	-0.00484969	0.00279201	0.00119386	0.00125506	-0.00547016	-0.00115958	0.000432183
mIhsm87	Iceland	0.0189095	0.0213679	0.0237191	-0.0136189	-0.0273517	0.0167157	0.00592071	0.00997368	0.00308572	-0.00620177	0.00775382	0.00323549	0.014631	0.0150057	-0.00214149	-0.00180182	0.000510873	-0.00728827	-0.00106395	-0.00526184	-0.00586649	0.011712	0.00566104	-0.00301879	0.00186521	0.0095263	0.0111467	-0.0003122	-0.00956319	-0.00167507	0.0001187	0.00157474	-0.00416793	0.00129399	0.0117202	-0.000574036	0.00637583	-0.00179603	0.00242317	-0.00166413	0.00455899	-0.000676198	-0.00376509	0.00575465	0.00248914	0.00364074	0.00413068	-0.00255181
mIhsm98	Iceland	-0.0523218	-0.0265697	-0.0382632	0.0015211	-0.0474197	0.0319261	0.00117962	-0.00417215	-0.00658898	-0.00968555	0.00619982	0.014377	-0.00482361	-0.0248002	0.00968384	-0.00570554	-0.00739568	0.010169	-0.0106509	0.000429653	0.00251768	-0.00194258	0.000460561	-0.00181348	0.00180459	0.00122845	-0.00173961	0.00537369	0.00326682	0.00143442	-0.00312251	0.00243645	0.00135717	0.00428968	0.00602344	-0.00396089	0.00194828	-0.0021775	-0.00485932	-0.0010797	0.000262233	0.00172883	0.00114475	0.00263393	-0.00444667	0.00266838	-0.00147972	-0.00202975
mIhsm29	Iceland	0.0668687	0.0167157	-0.0173998	-0.000343985	0.0290662	-0.0123155	0.0159716	0.0116916	8.19307e-06	0.00763418	0.0197974	0.0145683	0.0103418	-0.00634231	-0.00128094	-0.01475	-0.000123485	-0.00472681	-0.0030185	0.00181705	-0.00745747	-0.0160911	-0.00426601	0.00405458	-0.00719441	0.000133604	0.00646234	-0.00510888	0.0105018	-0.0122401	0.000102689	0.00161481	-0.00674855	-0.000882182	-0.00235965	-0.0100141	0.000202969	-0.0094779	-0.00196454	0.00533862	0.000272412	0.00207373	-0.00599574	0.000382872	-0.00447794	-0.000132813	0.00233619	-0.00161944
mIhsm38	Iceland	0.0118646	0.0300781	-0.0113141	-0.0093527	-0.0155904	-0.00326507	0.0040076	-0.00180085	0.0282814	-0.00506521	0.00202411	-0.0080179	-0.0110164	-0.0126594	0.00590198	-0.00426974	-0.00054932	-0.0139216	-0.00537614	-0.00765738	-0.00312882	0.00881951	-0.00392204	0.00531993	0.00107814	-0.0124766	-0.00773872	-1.1473e-05	-0.00947663	0.00101227	0.0043633	-0.0045347	0.00351581	-0.00110586	0.00554381	0.00399976	0.00718178	0.0063913	0.00372378	0.00283737	-0.00109081	-0.00310013	-0.00437531	0.00478282	-0.00291311	0.00175331	-0.00189721	-0.00282759
mIkef25	Iceland	0.000498925	0.00272232	-0.0304588	-0.0159019	-0.00204279	0.0220549	0.0146501	-0.0142251	-0.00498344	0.00675229	0.00518172	-0.0122601	0.00698187	-0.00261664	0.000946085	-0.00167513	0.00529211	-0.0180303	0.00245785	-0.00424336	0.00589058	-0.00404864	-0.00728559	-0.00238731	-0.00215487	-0.000334768	-0.000465206	0.00893076	0.00621672	0.00486501	0.00381921	-0.0079225	0.0092854	0.00237873	0.00719779	0.00232574	-0.00623055	0.00254905	0.00117803	-0.00419504	0.00385379	0.00316308	-0.00230395	-0.00414022	-0.00198216	0.00330399	0.00238192	-0.00202628
mIkef35	Iceland	-0.00173755	-0.00506403	0.0122226	-0.0271427	0.0134204	-0.00899148	-0.0150848	0.0238807	-0.00712987	-0.0123866	0.0127663	-0.00603489	0.000248608	-0.00160729	0.00184243	-0.00198819	-0.00467295	-0.00711811	-2.09838e-05	-0.00120727	-0.000208556	-0.00825552	0.00247107	-0.00518164	-0.00501862	-0.00324298	0.00274212	0.0151388	0.00714405	-0.0074144	-0.00773362	0.00470472	0.00516057	0.000655601	0.00267181	-0.00633717	0.0117532	0.00850736	0.00315654	0.00159108	-0.00344624	0.0014795	-0.00175624	-0.0013063	0.00153629	-4.05676e-05	0.000801855	0.00318181
mIkef40	Iceland	0.0384005	-0.0343046	0.00930068	-0.0198812	-0.0265968	0.0124412	0.00897637	-0.00281457	-0.0100077	-0.00948582	0.00748926	-0.0126859	0.0294637	-0.0139592	0.0221317	0.00611201	-0.00663241	-0.00545939	-0.00782962	-0.0011519	-0.0124899	0.000534192	-0.00264607	-0.00767092	0.00136245	1.53967e-05	0.00293888	0.0116828	0.0019002	-0.011096	-0.00503133	-0.00313216	0.0025806	0.00343378	-0.00914727	-0.0016111	-0.00374885	0.00217513	0.00526596	0.00342105	0.00504212	0.00518418	0.00195456	-0.00488587	-0.000639543	0.00451205	0.00507749	0.00473914
mIkef41	Iceland	-0.00774378	-0.00858098	0.00900501	0.00872661	0.0127962	0.0436617	0.0279989	-0.00556363	-0.0073399	-0.00743862	-0.00318111	-0.020832	-0.0117428	0.00416994	-0.0227423	-0.00280097	0.00200453	-0.0143592	-0.00278034	-0.00174866	0.0106638	0.00760984	0.00236313	5.35913e-05	-0.00694139	-0.00784936	-0.00223247	-0.00607638	0.0023508	-0.00839018	-0.00457115	0.000693022	0.000200773	0.00168269	0.0013146	-0.00355136	0.00138596	0.000772245	0.000133115	6.27962e-05	0.00590374	-0.00638606	4.68409e-06	-0.00134212	-0.00366567	-0.00269832	-0.000450926	0.00124458
mIkef49	Iceland	0.015036	-0.00706324	-0.012953	-0.0451547	0.0137019	0.0208242	0.0153566	0.0023334	0.0212329	0.0013716	0.0028305	-0.00774112	0.0015206	-0.00578537	0.00486916	0.00389541	-0.00439359	-0.00825861	-0.00861091	0.000136305	-0.00335752	-0.000324566	-0.00106104	-0.00529159	-0.00121582	-0.00335088	0.0024582	0.00595676	-0.00917178	-0.0092508	0.00658289	0.00836746	-0.00225044	-0.00216437	0.0102449	-0.000912033	-0.00016848	-0.00290545	0.00277626	-0.00302372	-0.0034447	-3.86206e-05	0.00615376	0.00298306	0.0015505	0.00244569	-0.000616846	0.00114527
mIkel20	Iceland	-0.00625608	0.00644919	0.0111025	-0.0194141	0.0208448	0.000953703	-0.0208716	0.0125344	-0.0115346	-0.0193331	0.0120995	0.004495	-0.00339617	-0.00987267	-0.00121625	-0.00505229	-0.00843022	-0.00329212	0.00608356	-0.00124235	0.00586952	-0.00294135	0.0069711	0.000818978	-0.00323777	-0.00549934	0.00269809	0.0012332	0.00281647	0.0013334	-0.0082599	0.0026215	0.00265773	-0.00488351	-0.00175262	0.00440007	0.00930999	-0.000190115	-0.00308864	0.00369134	-0.00499113	-0.000479657	0.00151609	0.00128043	-0.00408528	-0.000890789	-0.00570519	0.00227698
mIkel22	Iceland	0.016891	-0.00433293	-0.022126	-0.00813858	0.00552959	0.0024415	0.0240387	-0.0203602	0.00546673	-0.0176854	0.00939711	0.0118691	-0.00619718	0.00952725	-0.00842568	-0.00868144	0.0207384	-0.0113256	-0.000968263	0.00645479	0.00270113	0.00701317	0.00579687	0.0018597	0.00163615	0.0076543	0.00365082	0.0088249	-0.0037568	-0.00339718	-0.00526884	0.0073463	-0.00406627	2.19185e-05	0.00133469	0.00314415	0.000710093	-0.00155777	-0.00569319	-0.00175354	-0.00562996	0.000433128	-0.000487953	0.00304718	-0.000928788	0.00444723	0.0014522	0.00384777
mIkel25	Iceland	-0.00914407	0.0102027	-0.0281281	-0.0174872	0.0102985	0.0107987	0.0116238	-0.0195315	-0.00951972	-0.0012941	0.0072779	-0.00894535	0.011288	0.00266133	0.00153085	-0.00513995	0.00389204	-0.0180844	0.00374641	-0.00762906	0.00381424	0.00043195	-0.00379468	0.00244605	-0.00511395	-0.00246229	-0.00206964	0.00347952	-0.00032263	0.00554779	0.00195882	-0.00730549	0.00791935	0.00269116	0.00574418	-0.00233712	0.000241728	-0.00143657	0.00166527	-0.000135538	-5.61617e-05	-0.00102178	-0.000357126	0.00209461	0.00753696	-0.00285988	0.00273146	0.000226193
mIkel29	Iceland	0.00158213	0.0118856	0.0184419	-0.00278157	0.0320756	0.0322859	-0.00330926	0.0133868	-0.000451573	-0.00973725	-0.00592344	-0.00308979	0.00460699	-0.00560061	0.0188641	0.0086425	0.0022286	0.0071767	-0.0181541	0.00218682	0.00644066	0.000937446	0.00917143	-0.00959793	-0.000615441	0.00484587	0.0057769	-0.000653741	-0.00470963	-0.00630539	-0.00422464	0.0031444	0.00459007	0.000515501	0.00382177	-0.00203704	-0.00651148	0.006294	-0.00334602	-0.00290953	-0.00429399	-0.00149502	-0.00160394	0.000734501	-0.00475967	-0.00465655	-0.00260938	-0.00277304
mIkel34	Iceland	0.0398883	0.0124155	0.0441277	-0.0435148	0.0172902	0.00364807	4.36948e-05	0.0116652	0.0109333	-0.0258742	0.00200996	0.00489332	-0.0148143	0.00427377	-0.00531068	0.0156336	0.00530813	-0.0119918	0.0164205	-0.0132357	0.00128277	-0.00588647	-0.00650251	-0.00756309	0.00611277	0.00701273	-0.00505588	-0.00480667	0.00481107	-0.000505045	0.00637248	-0.00657944	-0.0124458	0.000354236	0.00128519	-0.00113609	-0.00620212	0.00410744	-0.00315231	0.00632192	-0.000515069	-0.00586567	0.002346	0.00482178	0.00144835	5.53607e-05	-0.00246141	0.00297311
mIkel13	Iceland	-0.0148981	0.0326679	-0.00979282	0.0122997	0.0133319	0.0159929	-0.0113673	0.000140385	0.0100886	0.00336501	-0.00524394	-0.00127385	0.0104347	0.00797493	-0.0140967	0.0209114	0.00193318	-0.0066455	-0.0159623	0.00461171	0.00146635	-0.0127756	-0.00285733	0.000945777	0.00546575	-0.00143085	0.000856568	-0.00166531	0.00333124	0.00631242	0.00112656	-0.00368153	0.00208094	0.0101403	-0.00786108	0.00165453	0.00534547	-0.00591344	-0.00861525	-0.00411575	0.00115135	-0.00584835	0.00202802	0.00564112	-0.00356055	-0.00181662	-0.00475449	0.000375895
mIkel21	Iceland	0.0714466	0.0426665	-0.0315838	-0.0127826	0.00718809	0.0069478	0.0287661	0.00163478	-0.0366068	-0.0321147	0.0102296	0.00528957	0.00770442	-0.0166441	0.000885061	0.0111209	-0.011291	0.00401215	0.0087604	0.0219568	0.0103778	-0.0016669	0.00469705	0.0055773	0.00371458	-0.0148395	0.00748748	-0.00853651	-0.000398403	0.00732671	0.0109843	0.00898423	-0.0106891	0.00230051	-0.000299037	-0.00426644	-0.00562195	0.00171929	0.00344896	0.00154871	-0.000281631	0.00140068	-0.00161063	0.0071137	-0.00361112	0.00133378	0.00248488	-0.000576496
mIkel8	Iceland	-0.00125311	0.00304727	-0.00545815	-0.00578616	-0.0179692	0.0328584	0.00807337	-0.00458052	-0.000781626	-0.00999669	0.00313503	0.0043684	-0.00650624	0.00484388	0.00918679	0.00657551	0.00816311	-0.000445008	0.00341686	-0.00403183	0.00868813	-0.00591418	-0.0128915	-0.00261663	0.00541205	-0.00812157	-0.00395944	0.000769701	-0.0103221	0.00248063	-0.0108052	-0.00217845	0.0117076	-0.00590754	-0.00534957	-0.000889221	-0.00196264	-0.0111186	-0.00360497	0.00266198	0.000790248	-0.00154783	-0.000106109	-0.00131521	-0.00203132	0.00134254	-0.00268943	-0.00436223
mSdenA	Scandinavia	0.00677834	-0.00678563	0.0105	-0.00598179	0.00512463	0.00477765	-0.0208902	0.00796531	-0.016886	0.00683159	0.00304741	-0.000228371	-0.00790837	0.000562369	-0.00503417	0.0162381	-0.00650651	0.00429027	0.00137855	0.00137445	-0.00746273	0.00398647	-0.00389059	-0.00974914	-0.00792067	0.00395748	0.0152799	0.00459004	-0.0074699	-0.00945034	0.00501449	0.00900689	0.000113151	-0.00339749	-0.00226666	-0.00127966	-0.00328182	-0.00114284	-0.00636226	0.00321456	0.00560308	0.00246349	0.00358196	0.00277656	0.00172253	-0.000232095	0.00101207	-0.00468793
mSdengb	Scandinavia	-0.000707416	0.033742	0.0328847	0.0253838	-0.0414115	0.00575321	0.000789748	-0.0049194	-0.00218543	-0.012426	0.0128269	-0.0143227	-0.0186351	0.0172776	0.00249573	0.00451734	-0.00365088	0.00715823	-0.0155496	0.00297956	-0.00617385	-0.00677485	-0.002839	0.00109684	-0.00247386	0.00190078	-0.00027981	-0.00103032	0.00563895	-0.00153561	-0.00325051	-0.0093434	0.00132472	0.00747227	0.0033412	-0.00903138	0.00436498	-0.00614497	0.00179669	-0.0010845	-0.00671445	0.00702204	-0.000967004	0.00120509	0.000352904	0.00167288	-0.000893803	-0.000815104
mSdeng5	Scandinavia	-0.0384182	0.00321528	0.0198455	0.0191046	-0.0105744	-0.000912454	0.0146734	-0.00841289	0.00553102	0.0016831	0.0181103	-0.00875685	0.00431847	-0.0193942	0.0125664	-0.00566812	-0.0026302	0.000292568	0.000680109	0.000278369	-0.0104691	0.00571152	0.00568721	0.00300856	0.00549585	0.0029483	0.00522163	-0.00135113	0.00110785	5.30462e-05	0.00958382	-0.00682924	-0.00271527	-0.00370297	-0.00703044	0.00342217	0.00780976	-0.000331368	-0.00297173	-0.00638619	0.00383381	-0.000396165	0.000664002	-0.000274499	-0.000671228	-0.00339485	0.00217188	-0.00190812
mSdeng6	Scandinavia	-0.0324787	0.019725	-0.0192981	-0.00340732	-0.0186421	-0.00737804	0.00259681	0.00239863	0.00316709	-0.00245438	0.00505359	0.0048831	0.00194127	0.0120939	-0.0159551	0.00796817	0.00212308	0.0109537	0.00297761	0.00653783	-0.00946135	-0.0100711	0.0103714	-0.00852239	0.00242194	-0.00503304	-0.000293993	-0.00124668	0.00615686	0.00232219	0.000252978	-0.00384984	-0.000387188	0.00569071	-0.00783105	-0.00182461	0.000757126	-0.00710051	-0.00013825	0.00189536	0.00389853	0.00245461	-0.00203994	0.000951038	0.00560619	0.000347108	-0.00469596	0.00279145
mSdeng30	Scandinavia	0.0370031	-0.0253343	0.0732673	0.0262811	-0.00730664	0.0273231	-0.0157677	-0.0313381	0.011157	-0.0133378	0.00435327	0.019275	0.0169855	-0.00273895	-0.00702787	-0.0108892	-0.0133182	0.00128124	0.00548584	0.0266713	-0.00848419	-0.00393564	-0.00732439	0.00185693	0.0177635	-0.000307491	0.00542318	0.00749692	-0.00696627	0.0128425	0.00502723	-0.00469498	0.00403611	0.00187002	-0.00482762	0.000258527	-0.00184651	0.00534853	-0.00425549	-0.00103694	0.00190071	0.00194215	0.00194556	-0.0057149	0.00315546	-0.00304126	-0.00145094	0.0013832
mSdenUR	Scandinavia	0.0753392	-0.00333749	-0.00628746	0.0477611	-0.0252162	-0.0286631	-0.0417779	-0.0485459	0.00277347	0.0198155	0.00448714	-0.000921129	-0.00305665	-0.0142888	-0.0100545	-0.0125522	0.00161847	-0.00833843	-0.00291516	-0.0154933	0.00360172	-0.00128685	-0.00468975	0.0016693	-0.00129019	0.00474607	0.0109165	0.00285082	0.00864188	-0.00906202	0.0123446	0.00819575	0.00135992	-0.00793914	-0.00151194	0.0029712	0.00314391	0.000721522	-0.00181955	-0.00606235	-0.00330926	-0.00107953	0.00168488	0.000273436	-0.00170853	-0.00270306	0.000496104	0.00473564
mSnor1526	Scandinavia	0.00999588	-0.0291477	-0.00868555	0.0126262	-0.0136515	0.00495317	0.00596904	-0.0121317	-0.000825456	0.00644888	0.00598028	-0.014669	-0.00650896	0.0074985	0.00408727	-0.0114723	0.017949	-0.00158071	0.00945607	0.00208191	0.00572914	-0.000233946	-0.00110511	-0.00208226	-0.000319166	0.00301021	0.00735382	-0.0106821	-0.00220812	-0.00294317	0.000438099	-0.00680928	0.00414985	0.000810205	-0.00316085	-0.00408049	0.00327835	0.00165201	-5.73937e-05	0.00562034	-0.00738748	0.00287035	-0.00943039	-0.000970205	-0.00723801	0.00052828	-0.000680753	-0.00406566
mSnor1511	Scandinavia	0.0457158	0.0312899	-0.00851794	0.003179	-0.0116585	-0.00730368	-0.00827508	0.00815119	0.0111357	-0.000367571	0.0115374	0.00625922	0.00829804	0.00402321	0.0108977	-0.00652105	0.00700517	-0.00750737	0.0186494	-0.00508925	0.000293123	-0.002478	-3.07458e-05	0.00131307	0.00113248	-0.00966298	-0.00911537	0.00167736	-0.0027186	0.00120371	0.00395098	0.00434528	-0.00210152	6.69808e-05	0.00215798	0.00739499	-0.00269274	0.0043599	-0.000652528	0.00189652	-0.00449415	0.00494854	0.00499812	0.00256219	-0.00394481	-0.00335252	-0.00523571	-0.00273722
mSnor4764	Scandinavia	0.0172024	-0.0144752	0.0172168	0.0129405	-0.00320942	-0.00559583	0.0171591	0.00680899	0.00201882	-0.00372676	0.0104168	-0.000573661	0.00501571	0.0135212	0.0150565	0.00530131	0.00485965	-0.0093217	-0.00356641	-0.0119603	0.00668581	0.00159712	0.00202579	-0.00682716	0.00194387	-0.000624239	-0.00373808	0.00436675	-0.00182421	0.00369948	-0.00311503	0.00413016	0.00181833	-0.00533123	-0.00112794	-0.00342942	0.0042511	-0.00424748	0.00969477	0.00331742	-0.00118802	0.00155332	-8.66928e-06	-0.0039495	-0.000217522	-0.00577353	0.00425123	-0.00411718
mSnor4481	Scandinavia	-0.0169207	-0.0305784	-0.00533864	0.00442112	0.0171318	-0.0134533	0.0208137	-0.015067	-0.0144895	0.0116125	-0.0102601	-0.00682849	0.0109847	0.00877429	-0.00521467	-0.0101158	-0.00555718	-0.00114652	0.00134783	-0.00333482	-0.00506659	5.3166e-06	-0.0076229	-0.00824547	0.00471499	0.0104316	-0.00477285	-0.00161215	0.00934732	0.00229705	-0.00138951	0.00529102	-0.0135039	-0.000693506	0.000648996	-0.0032418	-0.00589574	-0.00267142	0.00420437	0.00174415	-0.00156814	0.00744242	-0.0014389	0.00185581	-0.0014567	0.00202326	-0.00730427	-0.00122987
mSdenS25	Scandinavia	-0.00109597	0.0182776	0.0100102	-0.00325461	0.0111705	-0.0294138	-0.00280344	0.00611521	0.00121659	0.00135174	0.00311549	-0.00288338	-0.00355338	-0.00165823	-0.00426094	-0.0160101	0.0169244	0.0196149	0.00735338	0.00845996	0.0115752	-0.0102275	-0.0091372	-0.00185004	-0.00771383	-0.0205753	0.00611996	0.00331209	-0.00772038	-0.000907183	0.000141367	0.000113616	0.00431063	0.00530552	0.000972226	0.00446324	-0.000508245	-0.00197012	0.0036667	-0.0014252	0.00209567	0.00379476	-0.00877374	-0.00200099	0.00358251	7.10682e-05	0.000165379	-0.000887476
mSdenS26	Scandinavia	-0.0104553	-0.018899	0.0100405	0.0198165	0.00740885	0.00409807	0.00363232	-0.00987781	0.00190045	-0.00540431	-0.00177638	-0.000499345	0.00306442	-0.00211084	-0.00156448	0.00287414	-0.00637886	-0.00591754	0.00172024	0.0099793	-0.00498079	0.0111686	-0.00107556	0.00863103	0.00346423	-0.00727456	0.00471595	-0.00615487	0.00776516	0.00101918	-0.00141502	0.000989498	-0.00232559	0.00208089	-0.0017913	0.00559826	0.00594059	0.00827002	0.00785799	-0.00533834	0.000878939	0.00792566	0.00288464	0.00206431	0.00105293	-0.00386929	0.00184566	-0.00180419
mSnor7087	Scandinavia	-0.0164185	-0.0540048	-0.0359024	-0.0172924	0.0025923	0.0202466	-0.0162831	-0.0175	-0.00097382	0.00360971	-0.0105818	0.0234659	-0.00831302	0.0147277	-0.00397555	-0.0128452	0.0152581	-0.00189937	-0.0146818	0.00690938	0.000124841	-0.0187937	0.0123106	0.0103559	0.00986209	-0.0123808	-0.00160796	0.00118089	-0.00118214	-0.00941588	3.46449e-05	-0.00744988	-0.00656189	-0.00802734	0.000564158	0.000468384	0.00264997	-0.00489211	0.00203739	0.000512714	0.000520968	0.00319208	-0.000555336	0.00722973	-0.00313359	-0.00368659	-0.0018443	-0.000101758
mSden64	Scandinavia	-0.0272902	-0.00247871	0.031194	-0.0121229	0.0171163	-0.0163079	-0.00846472	0.0196295	-0.00869919	-0.00200464	0.0132273	-0.000319814	-0.00686275	-0.0121221	0.0227317	-0.00366011	0.0175221	-0.00517933	0.0042877	0.0147209	-0.0128678	0.00367418	0.00852691	0.0072399	0.00808187	0.00520162	0.00163848	-0.0115028	0.00620275	-0.00238277	0.00491904	0.000139146	0.000594689	-0.00924092	0.00795139	0.00113648	0.00138537	0.00253219	-0.00590821	0.000279454	0.00257534	0.00387635	-0.00791558	-0.0040278	-0.00373784	0.00233603	-0.00415247	0.00481359
mSdenStby	Scandinavia	-0.0403548	0.0120326	-0.00533369	0.0259409	0.00375593	-0.0159072	0.00577036	0.00699018	0.0029428	0.0083968	0.0220299	-0.00682318	0.00314426	0.00613675	0.00598887	-0.00193759	-0.0115081	0.00486248	-0.010488	0.000345188	0.00917542	0.0103378	-0.00630151	0.000118787	-0.0022728	-0.00418006	-0.00556255	0.0061459	0.00340918	0.00477079	0.0116161	-0.0102616	-0.000435623	-0.00752871	-0.000304219	0.000855053	-0.00138008	-0.0104853	-0.00226963	-0.00128613	-0.000831451	-0.00750838	-0.0003101	0.000557022	-0.00374818	0.00259603	-0.00141834	0.00247999
mSdenTby	Scandinavia	0.0143603	0.00986594	-0.0163884	0.0440408	-0.00456891	0.00534448	0.0123097	-0.0138222	-0.0260377	0.0190727	-0.00841134	-0.0022017	0.00564259	0.00617629	0.0146998	-0.00868696	0.0148273	0.00322229	-0.00250567	0.00281211	0.00660882	0.000665915	0.000933313	0.000699527	-0.00453144	0.0109809	0.00129668	0.000801931	0.00053264	-0.00107004	-0.00802894	-0.00186053	0.00317631	-0.00854465	0.00260168	-0.000395907	0.00271345	-0.00325382	-0.000965082	0.000791052	-0.00525262	0.00313402	0.00131033	0.00255896	0.00619012	-0.00326001	0.000484605	-0.00106029
mSdenV3	Scandinavia	-0.0255901	-0.0108818	0.0463225	0.0268832	0.0233387	0.027358	0.00239408	-0.0189954	-0.0164447	-0.026888	0.0297455	0.0162611	-0.010806	0.0134232	-0.0136428	-0.0015935	0.00363033	0.0137477	0.00501637	-0.0022771	-0.0107398	0.00673273	0.0168107	-0.00885721	0.0114442	0.00532193	0.000694175	0.0168088	0.00733886	-0.00953712	0.00158015	-0.000107473	0.00403655	-7.29657e-05	-0.00293586	-0.00204866	-0.00227446	0.00589686	0.00646111	0.00120329	0.00198464	-0.00478572	-0.00192776	0.00211934	0.00262295	-0.000669077	-0.000320002	-0.00613029
mSdenV82	Scandinavia	-0.0384853	-0.0395762	-0.0227163	0.018872	0.00109437	0.00321265	-0.01153	0.00603613	0.018306	0.0088522	0.0103623	0.0060766	-0.00183767	0.00605652	-0.00182161	0.0143029	0.0173586	-0.0105493	-0.00121283	-0.00250321	0.0018539	-0.00260845	0.0130467	-0.000202762	-0.00152416	-0.00882947	0.0134826	-0.00813457	0.00416229	0.00828339	0.00465865	-0.00917283	-0.0050355	0.0035757	-0.00235054	-0.00532121	0.0028242	0.00441046	3.98494e-05	0.000398942	-0.000186831	-0.00381714	-0.00481179	-0.00167875	0.000937532	-2.57301e-05	0.0020075	0.00099371
mSden1645	Scandinavia	-0.0210481	0.00427562	-0.0279416	-0.029356	-0.0046463	4.15259e-05	-0.0252768	-0.00153061	0.01847	-0.0264661	0.011539	-0.00810617	-0.000446126	-0.00655993	-0.0142731	-0.000787478	0.000790317	0.0182135	0.00367895	0.00349967	0.0124973	0.00295876	-0.00674	0.00388694	-0.000663798	0.00248271	0.0121332	0.0170396	0.0039144	-0.00535852	-2.10159e-05	-0.00272711	0.000883346	-0.00240363	0.00112706	-0.0011991	0.000145076	0.000239637	-0.00123187	-0.00297199	-0.00249368	-0.00284481	-0.00249058	-0.00209164	-0.000145933	-0.000981245	-6.12516e-05	0.000833554
mSdenVV1	Scandinavia	0.0372231	0.0183802	0.0233586	-0.00374722	0.00255034	-0.013289	0.00949587	0.00104321	-0.00334318	-0.0014971	-0.00410422	-0.00610205	-0.00698648	0.0278067	0.028106	-0.00419605	-0.000367112	0.00305907	-0.00734878	0.00141534	-0.00668887	0.00183958	-0.0051981	-0.00325405	0.00227064	0.000557673	0.0037242	0.00468622	-0.00202516	-0.00594253	-0.00534095	-0.00184511	-0.0109589	0.00480841	-0.00237556	0.00360252	-0.00112397	0.000675473	-0.00322064	-0.00344876	0.00957742	0.00149604	-0.00412452	-0.00220711	-0.00251802	-0.00398017	-0.000480692	0.00328852
mSnorK1653	Scandinavia	-0.036634	0.0382623	0.00659401	0.0146096	-0.0137347	-0.0232951	0.00884056	0.00441606	0.00457375	-0.00319641	0.00157372	-0.00108606	-0.00813155	-0.0026111	0.000363796	0.00126406	-0.0101113	-0.00595316	0.0048298	-0.00329889	0.00138514	-0.00680779	0.00752653	-0.00405214	0.00224971	-0.00747837	0.00997648	-0.00026301	0.005379	0.0041573	-0.00381434	-0.00176775	-0.0095945	-0.00508971	0.00281364	0.00784915	0.000886743	0.000822739	-0.000145397	0.00516091	-0.00112873	0.000804461	-0.00421775	-0.00129835	0.00199522	-0.00379073	0.00246863	-0.00288386
mSnorE1651	Scandinavia	-0.0283089	-0.0744936	0.00407409	-0.0193805	-0.00452992	-0.0153844	0.0231999	-0.0164349	0.00229798	-0.00489968	-0.0119197	0.0135299	0.00489866	0.0161526	0.00400265	-0.00434561	0.00108747	-0.00150055	0.00885419	0.00322533	-0.00526826	-0.0045474	-0.0021748	-0.002741	-0.00415701	0.0102474	-0.00515323	-0.00801793	-0.00759951	0.00151363	0.00399535	-0.00324283	0.00433666	0.00850861	-0.00181496	0.0024286	0.00582476	0.00294833	-0.0042814	0.00287811	0.00171588	-0.00437785	0.00411908	-0.00413425	-0.00922868	0.000253055	-0.000295797	0.00177671
mSnor3706	Scandinavia	0.00602175	0.0239711	0.0221396	-0.0101828	-0.0240138	-0.00448585	-0.0117845	-0.0099546	0.0046661	0.00816369	-0.0057832	-0.00170736	0.0247433	0.00698298	0.00813856	-0.00949681	0.00773118	-0.0127754	-0.00236536	0.00696975	-0.00949884	-0.000328954	-0.0032765	-0.00412855	0.00826294	0.0017214	-6.48177e-05	-0.0047048	-0.00051527	0.00187077	-0.00178092	0.00377589	0.000324015	-0.000190229	0.0046178	0.00605075	0.003995	-0.00343393	0.000148499	0.00751368	-0.00293938	0.000142027	0.00633089	-0.00287627	-0.0021248	-0.00448579	-0.00627351	-0.00241485
mSdenHJ	Scandinavia	0.042938	0.045573	0.0323321	0.00384978	-0.0164058	-0.0240475	-0.00170752	0.0128134	0.00885776	0.0139828	-0.0125516	0.00334013	-3.39414e-05	0.00432388	-0.00851796	0.00114018	0.00422905	0.0011134	-0.00547062	0.00171422	-0.0071436	-0.00295411	-0.00535962	0.00311693	0.00227795	0.011533	0.00230673	-0.00614657	0.00465763	0.00857308	-0.000937972	0.002124	0.00539356	0.00665104	0.00571369	-0.00798529	-0.00934474	-0.00181043	-0.000307153	-0.00536198	-0.00191571	0.00434134	-0.00281926	-0.00236017	-0.0026798	-0.000122429	0.00239393	0.00120279
mSden3983	Scandinavia	0.0527877	0.0286159	-0.017477	0.00547073	0.00217156	-0.0144277	0.0191384	-0.0195189	0.0235179	-0.0190874	-0.00442254	0.00858332	-0.00301994	0.00452079	0.00469976	-0.00532482	-0.00514415	-0.00138991	0.0160281	0.00358368	-0.00811354	-0.00257006	0.00753051	-0.00869606	-0.000353085	0.00576475	0.000413715	-0.0065966	-0.00609231	-0.000113936	-0.00140705	0.00232778	0.00738999	-0.00438276	-0.00597737	0.000787994	0.00324625	-0.0039988	-0.00539088	0.0031932	-0.00701971	-0.00165399	-0.00278864	-0.00146991	0.00161826	-0.00151593	-0.000993387	-0.00148421
mSnor5280	Scandinavia	0.0166696	0.0160477	0.000194264	0.00278568	-0.0123319	0.00196421	-0.000595418	0.0159226	0.0214742	-0.0151222	-0.0101751	-0.00265591	0.0154361	-0.00189674	-0.0048925	-0.0049347	-0.00136348	0.00705666	0.0254632	0.00417682	0.0141739	0.00940817	0.00276403	-0.00140031	0.0109886	0.00937507	-0.00031562	0.00427891	-0.00284975	0.00815004	0.00349532	0.000402247	0.00420793	-0.00440606	0.00457349	-0.00562764	-0.00353038	-0.00586584	-0.00314848	0.00463505	0.011023	0.00745635	0.00173871	-0.00218302	0.000110278	-0.00398508	0.00251303	-0.000355669
mSnor5278	Scandinavia	-0.0253605	-0.00945521	-0.0235966	0.0552261	0.00494326	-0.0302284	-0.000203871	0.00580436	0.000641517	-0.00316391	0.00506937	-0.0109087	-0.00180668	-0.00395629	-0.00195344	0.00547328	0.000977293	-0.000824413	0.0136807	-0.00233038	0.0136648	-0.0123853	0.00321775	-0.00750692	0.0081565	0.00188232	-0.00710425	0.00358878	0.00233304	-0.00726914	-0.0008764	-0.00298013	-0.000176866	-0.00270868	-0.00298516	0.000222001	-0.00562897	0.000598812	0.00305895	-0.00373511	-6.0038e-05	-0.00209418	0.00483684	-0.00682186	0.00613312	0.0035062	-0.00465802	-0.00555236
mSden19	Scandinavia	0.00942752	-0.0140239	-0.00634613	0.00372282	-0.026506	-0.0172944	0.0243873	-0.00698465	-0.0149379	0.00825491	-0.0205095	-0.000426674	-0.00902684	-0.00629845	0.00705646	-0.00711448	-0.00641858	-0.00854707	0.000281344	0.00353613	0.00231519	-0.00354182	-0.0022374	0.00488048	-0.0083571	-0.00126729	0.00053505	0.00599128	0.00534601	0.00769716	-0.00272474	-0.00512537	0.00497326	-0.00170404	-0.00124426	-0.000624489	-0.000275987	0.0103203	0.0017653	0.00230151	0.00421997	-0.0057805	0.00164023	0.00303464	-0.00086073	-0.0020408	-0.00112478	-0.00120008
mSnor5304	Scandinavia	-0.00255766	0.0237702	-0.00929927	0.00317705	-0.000217671	-0.00406041	0.0240752	0.000470166	0.0125296	-0.0284464	-0.00181752	0.0042307	-0.00852853	-0.0029466	-0.00905404	0.00852301	-0.00368472	-0.00762405	0.00242463	-0.0058559	0.0038117	0.00086245	-0.00487471	-0.00130379	-0.00174365	0.00629268	0.00112228	0.000836375	0.0046283	-8.66315e-06	-0.00113966	-0.00152263	-0.00191445	0.00175965	0.0067287	0.00429984	0.000839833	0.000642582	-0.00209548	-0.0014609	0.000689122	0.000579009	-0.0014954	-0.00578969	0.000517953	-0.00251402	0.000271597	0.000228704
mSden4006	Scandinavia	-0.00597134	-0.00890527	0.00862614	0.0497467	0.0185396	0.0105069	-0.00473738	0.0115322	0.0139801	0.0102701	-0.0178676	0.0167499	5.35589e-05	0.00838426	0.000800097	0.000303089	0.00463224	-0.018462	0.000759464	0.0102953	-0.00661475	-0.00721294	0.00120163	0.00885891	-0.0109874	-0.000156721	0.0014053	0.00586633	-0.00203353	-0.00409058	0.000116231	-0.000876702	-0.00708971	0.0024718	-0.00337834	0.00872277	-0.00302126	-0.00104432	0.00189678	0.00150809	-0.0022621	0.00103035	-0.00100116	-0.0050639	-0.00754112	0.000361628	0.000890017	-0.00191286
mSnor4564	Scandinavia	-0.010384	-0.0283444	-0.011233	-0.00107681	-0.0113366	-0.0062595	0.00725187	0.000195082	0.00198674	0.00515084	-0.0021176	0.00399475	-0.00155589	-0.00462481	-0.0104281	0.013703	0.00467057	0.00344336	0.00294022	-0.00789784	0.0101172	-0.000151159	-0.0127511	-0.000501246	-8.76363e-05	0.0010461	-0.00327599	-0.00962116	-0.0117048	-0.003505	-0.00190942	0.0105957	-0.000565175	0.00159459	-0.00985155	0.00500465	-0.00161225	0.003563	-0.00165478	0.00181431	0.00269078	-0.00184439	-0.00266185	0.000348337	0.00398653	-0.003635	0.00199464	0.000949552
mSdenS1	Scandinavia	-0.0393752	0.028289	0.00517321	-0.0143994	-0.00631892	0.0158129	0.00566156	-0.00256045	-0.0189186	-0.00701015	-0.0171718	-0.000801765	-0.00462562	0.00406011	-0.00166205	-0.0029718	-0.0115202	-0.00909847	-0.000518732	0.00806425	0.00953577	-0.00706568	0.00570872	0.000164163	-0.00431487	0.00131244	0.00993668	-0.0015732	-0.00870148	0.0123785	0.000579582	0.00101574	-0.00574608	0.00216017	-0.00659701	0.00257031	-0.00158234	0.00237578	0.00022177	0.000265284	-0.00664964	-3.92608e-05	0.00351045	-0.00594873	-0.00109706	0.000474901	0.00107061	0.00408619
mSdenS9	Scandinavia	-0.0201865	0.0308688	0.0100426	0.0165406	0.0147748	-0.00983523	0.0160291	0.00635295	-0.0100462	0.00594354	0.00738458	0.0121436	0.00656274	0.0125301	0.0120571	0.0117751	-0.000442755	0.00804736	0.00702705	0.00138235	0.0052036	-0.0105847	-0.00599806	0.00183915	0.00179804	-0.00305209	0.00707663	0.000469529	0.00321971	0.00251622	-0.00160456	0.00584193	0.00401815	-0.000487358	0.00907965	-0.00454919	-0.00241736	0.00688749	0.0038562	0.00282798	-0.00586139	0.000977918	0.0036463	-0.00120747	0.00381982	0.00115046	0.00244773	0.000390544
mSdenS31	Scandinavia	0.00963276	0.0161838	0.0359887	-0.0129528	0.0140729	0.00353829	-0.0292555	-0.00890092	0.00926633	0.0147715	0.00122271	-0.00634662	-0.000291834	0.0149792	-1.91549e-05	0.00483918	0.0186762	-0.00313091	0.00345253	-0.0084236	0.00915092	-0.00786936	0.00182169	-0.0123653	0.00269661	0.00988674	0.00257627	0.000109266	0.00184236	0.00454507	-0.00654696	0.000800865	-0.00528123	0.0017714	-0.000830676	0.0041329	-0.000106036	-0.00274679	0.000380633	-0.00101135	0.00447608	-0.000714283	0.00488002	0.00472163	-0.000696766	0.0036755	-0.00409692	-0.00125333
mSnor4665	Scandinavia	-0.0163219	-0.00924479	0.029063	0.00506281	-0.03382	-0.00665488	-0.0162772	0.019767	-0.0148341	-0.00344643	-0.00824613	-0.0113325	0.00774602	-0.00464031	-0.00404101	-0.00153963	0.00956641	0.00471104	-0.000278286	-0.00670908	0.0156259	-0.00699434	0.0103899	0.00526361	0.00134832	-0.000800768	-0.0042664	-0.00780498	0.000370721	-0.00252769	0.000958863	0.0031775	-0.00216995	0.00377571	0.00207275	0.000147193	-0.000103286	-0.00415304	0.00142814	0.00797945	0.00583346	0.001886	-0.00158639	-0.00298129	-0.00574027	-0.00102436	0.00393182	-0.0003932
mSnor4727	Scandinavia	-0.0337752	0.0248991	-0.0155024	0.00224655	0.00214663	0.00737572	-0.00987426	0.0147944	0.0014515	-0.00357631	0.0113157	0.00727758	-0.00258378	-0.00651927	0.00957332	0.0155745	0.0151701	0.00613651	-0.00095089	0.000992969	-0.000371219	-0.00509699	0.00260912	-0.000911312	-0.00440006	-0.00756944	-0.0047247	-0.0010311	0.00482221	-0.00165878	-0.00725507	0.00913627	-0.00461142	-0.00184486	0.00367813	0.00399349	-0.00166421	-0.000196241	0.00271885	-0.0019499	0.00261061	-0.00661844	-0.00146315	0.00220658	-0.00165146	0.000758885	0.00583107	0.000124472
mSnor2814	Scandinavia	0.0132732	-0.000702088	-0.00462751	-0.00183512	0.00668088	0.0194997	0.0107004	-0.00150515	-0.0231423	-0.008749	0.0209708	0.00317244	-0.00786909	0.0124812	0.000641773	0.00569681	-0.0115998	0.00477216	-0.00158551	-0.0110772	0.0132883	-0.00242513	0.00351522	0.00400232	0.00691907	0.0144546	-0.00227989	-0.00691975	-0.00773665	-0.00128269	0.00467395	-0.00912707	0.00139241	-0.00334303	0.000740963	0.00859792	0.00183403	-0.00523821	0.0016432	0.0046943	-0.00817568	0.00411537	0.000260836	-0.00086065	0.00294708	0.00426792	-8.791e-05	0.00164252
mSnor2816	Scandinavia	0.00890151	-0.000466594	-0.00527436	-0.00296102	-0.0231433	0.0146715	0.0138132	0.00388878	0.0133305	0.00012941	0.00261196	0.0172594	-0.00158531	0.00751467	-0.000469999	0.0116236	0.00529959	0.00140211	0.0074482	0.0111648	0.00524279	-0.00391142	-0.00539078	0.00587519	0.00388565	-0.00407713	-0.00174328	0.000958872	0.00528253	-0.00312226	0.00279989	0.00273142	0.0014942	0.00046545	0.00109906	-0.00312085	-0.0013259	0.00132123	-0.0034736	0.00312981	-0.00466932	-0.00338751	0.00293463	-0.001224	-0.00193771	0.00762489	-0.00391134	-0.00139484
mSnor2817	Scandinavia	0.0021175	-0.0109784	-0.0282923	0.00369112	0.000190575	0.0143785	-0.0172859	-0.0188525	0.0146883	0.00120741	-0.0163025	0.000136516	0.00210335	-0.00256992	-4.53394e-05	0.00211854	0.00711465	2.02988e-05	0.0075197	0.00694937	-0.00578102	0.00866421	-0.00107864	-4.62828e-05	-0.00807711	-0.0195963	0.00617016	-0.00866692	-4.61422e-05	-0.00578701	-0.0140751	-0.00440939	-0.00712175	0.000406829	-0.000517992	-0.0022522	-0.00141776	-0.0041664	-0.000975298	0.00540734	-0.000414025	-0.00544217	0.00480458	0.000101455	0.00168974	-0.000667635	0.0055844	-0.000450091
mSdenE	Scandinavia	-0.043036	-0.014027	0.0166968	0.00902915	-0.0199696	-0.00283668	0.0112753	0.00412936	0.00866965	0.00781163	0.0019321	-0.0136941	0.00912151	-0.00843075	-0.000163663	-0.00543491	0.00050097	0.012392	0.0148236	-0.000457185	-0.000901726	0.000260905	-0.0148458	-0.00153147	-0.0126354	-0.012399	0.00671507	-0.000183166	0.00784984	0.000618899	0.00226396	0.00484448	-0.0027957	-0.00436967	-0.00579973	0.000574459	0.00380288	0.000145251	-4.68847e-05	0.00865355	-7.01543e-05	0.000975386	-0.000929394	0.000401092	0.00150812	-0.000918683	0.00109958	0.00503483
mSdenJ	Scandinavia	0.0110573	0.020114	0.0254773	-0.0216026	0.00146363	0.0101933	-0.0289952	-0.0160607	0.0119968	0.00523778	0.00848834	-0.00996954	-0.0075221	0.0119031	0.00130494	-0.00433702	0.0127294	0.00618706	0.00457466	0.00906415	-0.00760065	-0.00828243	-0.00519263	0.00569965	-0.00231489	-0.0027944	-0.00557599	0.0118705	0.0177275	0.00170013	0.00661612	0.00448828	0.00418566	-0.00468693	-0.00307448	-0.000685009	-0.00722873	-0.00717534	0.00132273	0.00364204	-0.000125865	-0.00802333	-0.0103106	-0.00590085	0.00634433	-0.00406497	0.00185044	0.000776052
mSdenN	Scandinavia	0.0352564	-0.0147607	-0.0195337	0.00334845	0.0115611	0.0181091	-0.000297776	-0.024037	-0.0132681	-0.003977	0.00147907	0.00838418	-0.00224369	0.0104605	-0.00390101	0.00179377	0.000709742	-0.00115171	0.00498369	0.00561209	0.0106465	0.0196586	-0.00557767	0.00261496	-0.00471819	-0.00124756	-0.000597817	-0.00611863	0.00660726	-0.00359293	0.000111194	0.0025335	-0.000479996	0.00493055	-0.00212867	0.00281309	-0.000529557	-0.00647808	0.00219257	-0.00465493	0.00350681	0.00144522	-0.00523107	-0.00185851	-0.00318185	0.00360014	0.000667603	-0.00146123
mSdenVe2	Scandinavia	0.0203724	-0.0308131	0.0378191	0.0066734	-0.0202606	0.00963829	0.0167905	-0.0237424	-0.00379901	-0.00838063	0.0253767	-0.00426983	-0.00107412	-0.0251741	-0.00293065	0.00623361	0.00163063	-0.000585268	0.000608073	0.00604868	-0.0113899	-0.0134855	0.00464691	0.00657915	-0.00748495	0.00290322	-0.00245802	0.00342934	-0.00174309	0.0104437	0.00220519	-0.00461249	-0.00191543	0.00353533	0.00212205	0.0139335	0.0031676	-0.00512834	0.00807614	0.00373458	-0.000451004	0.00261833	-0.000708737	0.00565063	-0.00183297	0.00275399	-0.000625425	0.000361574
mSdenVeA	Scandinavia	-0.0108344	0.026261	-0.0274096	-0.00467797	-0.000707369	-0.0227956	-0.0231063	-0.0207837	-0.0129846	0.00634182	0.0021622	0.0104892	0.00559496	0.0153623	0.00580933	-0.00158892	0.00688553	-0.00709945	-0.000645692	-0.00221961	-0.00055355	-0.00809081	-0.0126359	0.0143847	0.0100154	-0.00624322	0.00933015	0.0218287	-0.00425009	0.00465219	-0.000438347	0.00438017	-0.00788593	-0.00950811	0.00110942	-0.00338607	0.00200054	0.00246685	-0.00534987	-0.000232273	0.00278911	0.000719147	3.48406e-05	0.00274232	-0.00192241	0.000893217	0.0022069	-0.00226713
mSdenBAD	Scandinavia	-0.00193294	-0.0191028	-0.0239578	0.00183256	0.00448404	-0.00688738	0.0345916	-0.00669334	-0.0167465	0.0161951	-0.00934995	0.00225419	-0.0116646	0.0212792	0.0134829	0.00151398	0.0122888	0.0191124	0.0111381	-0.00359207	-0.00392454	0.00115248	-0.00474785	-0.00283109	-0.000700504	0.000424082	-0.000244691	0.00469017	-0.00101591	0.00175279	-0.00220058	-0.000410025	-0.00547591	-0.00140915	0.00693369	9.42033e-06	0.00384004	0.00191654	0.00280479	-0.00188578	0.00374541	0.00234763	-0.000834523	0.00101853	-0.00272577	0.000793896	0.00068798	-0.000766438
mSdenFaI	Scandinavia	-0.0372909	0.00146694	0.012452	-0.0043802	-0.0200682	-0.0159015	-0.00439491	-0.00178224	0.00303654	0.00165007	0.0185235	-0.0193679	0.00630453	0.00147126	-0.0134917	0.001256	0.00812216	-0.00533182	0.00466968	-0.00363379	0.0092732	-0.00704696	-0.00103086	-0.000954004	0.0134227	0.00189687	-0.00454783	-0.0155748	0.000179219	-0.00647334	0.00492615	-0.000538641	0.000705845	0.00204342	-0.00380277	0.00405896	-0.00134888	0.000178965	-0.00527922	-0.00689935	0.00249076	0.00533597	-0.00141822	0.00249038	-0.00511219	0.000380488	0.000754298	-0.000765539
mSdenGalz	Scandinavia	-0.0573881	0.0175068	0.0462742	-0.00408168	0.0637546	-0.0525342	0.0369299	-0.0366394	0.0290549	-0.00202064	0.00747658	-0.00227915	0.0122382	-0.00248831	-0.0182222	-0.011606	-0.0104146	0.0127714	-0.0133828	-0.00797777	-0.000457137	0.0025219	0.00639019	0.00893144	0.00567497	-0.0134361	-0.00146624	-0.00307538	-0.00097051	-0.00210727	0.00454102	0.00627862	-0.0016211	0.00428058	0.00707952	-0.00956479	0.000806864	0.00286426	-0.00274726	0.00714587	0.00226864	-0.00233607	0.0100376	-0.00411659	-0.000286057	0.005809	-0.000979927	-0.00228841
mSdenGbgq	Scandinavia	0.004343	-0.0228106	0.0114293	-0.0385019	0.00730929	-0.025012	-0.0145768	0.0305583	-0.0112174	-0.00832227	-0.0106879	-0.00163333	-0.00149005	0.00595607	0.00703978	0.00138939	-0.00469859	-0.000295509	-0.00345395	0.00584943	-0.0102784	0.00284028	0.00164218	-0.00565048	-0.000410334	-0.00156264	0.00791542	-0.0084091	0.00549258	0.00253705	0.00648015	0.00158239	-0.00528868	0.000300156	-0.00592287	0.0036851	0.0003256	0.00235976	-0.00379602	-0.00475496	-0.00402065	-0.00320934	-0.00442302	-0.00392651	0.00315578	0.00314027	0.0012016	-0.0027304
mSdenGTa	Scandinavia	-0.0136758	-0.00634281	0.00507938	0.00610994	-0.00943292	-0.0133377	0.0173265	-0.00235362	-0.00850422	-0.00397434	0.0100756	0.000852929	-0.00457831	0.00675571	-0.00410756	0.00635884	0.0154006	0.00404426	0.00444583	-0.00614713	0.0046181	0.0019735	-0.00329412	0.010528	-0.00432027	-0.00160254	-0.00115105	0.00225827	0.0061323	-0.00277523	-0.0039316	-0.00214613	0.00791188	0.00806919	0.000504491	-0.000703493	-0.00201262	0.00488447	-0.00299192	0.00290735	-0.00230454	-0.000970466	2.62026e-05	-0.00290974	0.00211045	-0.00639842	-1.18411e-05	0.00193229
mSdenGuo	Scandinavia	-0.0120084	0.0354888	0.00835707	-0.0416507	-0.000879781	0.0362223	0.00403525	-0.00417873	-0.00587573	0.0208269	-0.0168437	-0.00934171	-0.020711	0.0133953	-0.00810652	-0.0111825	-0.00876528	0.0114776	0.000809619	0.00422263	-0.00278095	0.00102441	-0.0017514	0.00890439	-0.00079473	-0.00296108	0.000412051	-0.00569938	0.00432042	0.00211121	0.000569618	-0.000996108	-0.00473073	3.27418e-05	-0.00210262	0.00988259	0.00557703	0.00774769	0.00200003	-0.00361767	-0.00496117	0.0029643	0.0021339	-0.00418014	0.00159123	0.00218289	0.00278979	-0.000807994
mSdenGaxe	Scandinavia	0.0326209	0.0246046	-0.00256073	-0.00718145	-0.0205145	0.0139049	-0.0181326	-0.00182119	0.00500639	-0.0100088	-0.00939252	0.00860238	0.00414824	0.00388331	0.0126805	0.0176888	-0.0114975	0.00144268	0.0145337	-0.00641647	-0.013746	0.00794365	-0.00570851	-0.00580557	0.000883301	0.00487402	-0.00490384	0.000887733	-0.000523301	-0.00993641	-0.00162741	0.0119462	0.0016983	0.000599192	-0.00288162	-0.00339772	0.00594538	-0.00370615	0.00135285	2.83788e-05	-0.00499675	-0.0066978	-0.000110079	-0.00360229	0.000466708	-0.000762702	-0.00254571	-0.000691793
mSdenHessm	Scandinavia	-0.00560939	-0.0189201	0.0245601	-0.0128728	-0.0147295	-0.0272371	0.00273322	0.000785686	-0.00418893	0.0138552	-0.0114832	0.0186876	0.00238874	0.00641261	-0.00257715	0.000678747	9.36296e-05	0.0163992	-0.000680271	0.00473262	-0.0106164	-0.0015341	-0.00990533	-0.00394111	0.00853259	-0.00342474	-0.00576859	0.00121511	-0.000938298	-0.00463544	-0.0095269	-0.00209963	-0.0031062	0.000132139	0.00221035	0.00249807	0.00632259	-0.00290705	0.00065796	-0.00809712	-0.00653235	-0.00302637	0.00378369	0.00103447	-0.000244058	0.000778267	-0.000285813	0.000702979
mSdenKel	Scandinavia	-0.0457412	0.0304396	0.0129291	-0.0370483	-0.0182666	0.0267087	-0.0136584	-0.0103184	0.00096155	-0.0179355	-0.00401873	0.000406754	-0.00845177	0.00136996	-0.00959459	0.00376838	-0.00807056	-0.000137159	0.00990172	0.00160537	0.00537174	-0.00814889	-0.0115457	0.0189316	-0.0068292	0.0109238	-0.00584643	0.00268419	-0.0105369	-0.000779545	0.00297729	0.00298785	-0.0157951	0.00392968	0.0115743	0.00368617	0.000366197	0.00217674	0.00185534	-0.00564118	0.00133978	0.00160277	-0.00736298	-0.00391936	0.00268636	0.000918044	-0.00086489	-0.00389521
mSdenKap	Scandinavia	-0.00972939	-0.0142009	-0.021372	-0.000433681	0.0185691	0.00589909	-0.00925354	0.0115372	0.00393711	-0.0083387	-0.00066721	0.00500481	0.0105461	0.00571988	0.00801694	0.00917338	-0.00223997	0.00679179	0.00639677	0.00515883	0.00177532	0.0067287	0.00130222	0.0140866	-0.00182581	0.00565064	-0.00255481	-0.00586382	-0.000231651	-0.00899836	-0.00245371	-0.00188471	0.00399131	-0.00479705	-0.00028887	0.00596314	0.00297839	0.00552308	-0.00573175	-0.00300548	0.00564716	-0.00134006	0.000971275	0.000408951	0.0028041	-0.00022576	-0.00311226	0.00275761
mSdennbh	Scandinavia	0.0386846	-0.0253814	0.011659	-0.0144289	-0.00553445	-0.0186099	0.00199649	-0.00482517	0.00194365	0.000578037	0.00413334	0.00264622	0.00679205	-0.00741115	0.00201599	0.0136817	-0.0205663	-0.00335011	0.000151458	-0.00622268	-0.00214517	0.00342597	0.00331435	-0.00317294	-0.00661689	-0.00337499	0.0127737	0.0001186	0.00642525	-0.00852577	0.00604975	-0.00723835	-0.0011755	-0.00891729	-0.00118353	-0.000191726	-0.00360884	-0.00087937	-0.00655245	-0.0106811	0.00346385	0.00157757	0.00325037	-0.0013319	-0.00015848	-0.00220642	-0.00131231	-0.00245317
mSdenKlmr	Scandinavia	-0.011563	0.00897276	0.00850418	0.00977014	-0.0147958	0.0214782	0.00536203	-0.0125713	0.00279811	0.017876	-0.0036166	-0.00536127	0.0134743	0.00278702	0.00595794	0.0188024	0.00328553	0.00242388	-0.0106737	0.00914546	0.00460669	-0.011937	0.00487401	0.000384369	0.00912227	0.00854687	0.00139771	-0.00110612	-8.73492e-05	-0.0057286	0.00809679	0.0113357	0.00835841	0.0122104	-0.00934587	-0.00673632	0.00309494	0.00837654	0.00504508	-0.0061033	-0.00404807	0.000968643	0.00133926	0.00339855	0.00096773	0.004279	-0.000381058	0.00108841
mSdenKhH	Scandinavia	0.00687348	0.0102641	0.0636532	0.037294	-0.0383478	0.0310343	-0.00143185	0.00722737	0.010347	0.0209208	-0.0127159	-0.000979902	0.00437448	-0.00474489	-0.00466373	0.00672567	0.00775888	-0.00325838	-0.00549724	0.00570403	0.0165026	-0.00507596	-0.000804659	-0.0120025	-0.00454131	0.00576568	-0.000776184	-0.000668328	0.00299882	0.00348882	-0.00264897	0.00333583	0.00495495	-0.00490934	-0.00499394	0.0043091	-0.000469809	-0.000109026	0.00425782	0.00115423	0.0033579	-0.00362689	-0.00024221	0.000226624	-0.00429283	0.00647106	0.00198861	0.00119063
mSdenKr16	Scandinavia	-0.0315141	0.0183524	-0.0151493	-0.0125815	-0.00260333	-0.0111183	-0.0166381	0.00699441	-0.0244214	0.00494809	0.000764624	0.00654892	0.00690052	0.00442246	0.00124397	-0.00346337	0.00597496	0.00674809	0.00593165	-0.000104061	-0.00289631	0.0020845	-0.00346293	0.00431733	0.0117158	-0.00725793	-0.00399985	-0.00758126	0.00412216	-0.00720733	0.00853629	0.000202426	0.00796785	0.00456894	-0.00491694	0.00463349	-0.00569905	-0.00415126	0.00456569	0.000243516	-0.0078816	-0.00480173	0.0053623	0.00167474	-0.000225577	0.00503684	0.0102153	0.00142038
mSdenKr61	Scandinavia	0.00127182	-0.0291032	0.00147194	-0.00371777	-0.000972971	-0.0232325	0.0201241	0.00280611	-0.0185863	0.0173872	0.0142739	0.00669229	-0.0138326	0.00743082	0.000626856	-0.00420721	-0.00133741	0.000318997	0.00459631	0.0121102	-0.000624094	0.000571729	0.000867292	-0.00291689	-0.0018432	0.00290124	0.000412315	0.00143104	0.00377638	-0.00960873	0.00305382	0.00395431	0.00844043	-0.00199777	0.00638238	0.00596878	0.00212901	0.00241605	0.00705835	-0.00617368	0.000424987	-0.0040156	-0.00376087	-0.00103671	-0.00131228	-0.00343538	-0.00452279	0.00253332
mSdenKr67	Scandinavia	-0.00817137	-0.0514172	0.00702817	-0.012582	-0.012151	-0.00127019	0.000659395	-0.0109965	-0.0135438	-0.000964245	0.0136868	0.000133853	-0.00547641	0.00727912	-0.0118935	-0.0100255	-0.00883288	-0.00812315	0.00758577	0.00417678	-0.0125954	0.00197879	-0.0127222	-0.00659844	-0.00268536	0.00259576	-0.00224006	-0.000415545	-0.0113372	-0.00388579	-5.9796e-06	0.0030034	-0.000461706	0.000451147	-0.00159629	-0.00114683	-0.00883161	0.00266228	0.00153217	-0.0048156	0.000284519	0.00384286	0.00155776	0.00192683	-0.00287237	-0.00243521	0.00410542	-0.00112818
mSdenKr314	Scandinavia	-0.0127304	-0.0211427	0.0149917	-0.03368	0.00166834	-0.0006047	0.0130842	0.019848	0.0122601	-0.0202211	0.00549101	0.00217933	-0.00617133	-0.00253543	-0.00594799	-0.00692184	-0.00195424	-0.0115963	0.00202622	0.00324841	0.000663688	0.00814143	-0.00736427	-0.00389484	-0.00395202	0.00100134	-0.0110642	-0.00979314	0.00823849	-0.00266972	-0.00235525	-0.00301186	-3.22986e-05	-0.00492587	0.00440328	0.000912071	-0.00444015	-3.94962e-05	-0.00230248	0.00205031	0.00342172	0.00069915	0.00100232	0.00181739	0.0042031	0.00722465	0.00279194	5.54479e-06
mSdenTab	Scandinavia	-0.00976667	-0.0213157	0.0035477	0.0419925	0.00926696	0.0209401	-0.00484935	0.0163344	0.00759	0.00345431	-0.0134529	0.00211799	0.0022825	0.0105618	0.00402024	0.000225306	-0.00641623	-0.00373434	-0.00166513	0.00545471	0.00968825	-0.00236354	0.00473269	-0.0015581	-0.00761208	-0.00165354	0.00183644	-0.000595762	-0.00196135	0.00252818	-0.00305027	0.00154008	0.000378936	-0.00679758	0.000636793	0.00396418	0.00178825	0.000497127	-0.00341784	0.000422844	0.0060082	0.00401737	-0.000572494	0.00172901	-3.85798e-07	0.000601133	0.00196929	0.00570134
mSdenTSB8	Scandinavia	-0.0540022	-0.0264026	0.0103349	0.00206159	0.00313496	-0.0226316	-0.00227264	0.0169966	-0.000827113	-0.00311435	0.000127625	0.00659546	-0.00422617	-0.00575668	0.0027218	-0.0153003	0.00117705	-0.000531452	-0.00342297	0.0145458	0.00122388	-0.000419826	0.0106939	-0.0059222	-0.0051773	-0.00124517	0.000696965	0.00473228	0.00504399	0.00929537	-0.001178	-0.000959602	0.00278628	0.0014827	-0.00134722	0.00151148	0.00395817	-0.00412018	0.00389565	0.00110121	0.00118761	0.00658491	-0.00089275	-0.00123195	0.00296796	0.00021797	-0.00326491	-0.00125747
mBpby15	Soutern British	-0.0223452	0.0125215	0.0141946	0.0316894	0.0233504	-0.0121356	-0.0234413	0.000334837	0.00225243	-0.0230669	-0.0206299	0.00901062	-0.0129979	6.62141e-05	0.00248949	0.00770461	0.00551586	-0.00138796	-0.0151568	0.0117428	0.00116045	0.00220373	-0.00286172	-0.0076338	-0.0236331	0.00950394	-0.0263272	0.0027854	-0.0062321	-0.0148466	0.0203943	-0.00837119	-0.00338998	-0.00300377	-0.00353489	0.000625164	-0.00347948	0.00509995	-0.00271986	0.00139027	-0.00220059	0.00684438	0.00142315	0.00746926	0.00682506	-0.00231699	0.00242747	0.0019249
mBpby94	Soutern British	0.0197796	0.0693942	-0.0251614	-0.0079898	-0.0159428	-0.0198389	-0.0305318	-0.0298931	-0.00366712	0.0191834	0.00992686	0.0005584	-0.00423371	0.0144698	0.000309622	0.00112096	-0.0107475	0.00530998	-0.0172224	0.0122229	0.00299714	0.0127986	0.00623411	-0.0179702	-0.0123785	-0.00804852	-0.0130156	0.000665076	-0.00736297	0.000332274	0.0117789	-0.000604914	-0.00096546	-0.0115078	-0.00192777	-0.00262398	0.0018344	0.00498669	0.00608749	0.00886076	0.00514953	0.000766701	-0.00315368	-0.00603603	-0.00209547	0.00478552	-0.00132491	-0.00223478
mBpby107	Soutern British	-0.00732974	-0.000159254	-4.02285e-05	0.0175396	0.0115033	0.0218491	0.00749809	0.0163463	0.00511867	-0.00370764	0.00443356	-0.0177704	0.00371869	-0.0164418	-0.0293079	0.013313	0.017047	0.00536728	-0.00292948	0.00345847	-0.0249334	-0.00361586	0.00710939	0.00220409	-0.0144549	0.0109876	-0.00154949	0.00264881	-0.00844063	0.00652375	-0.0033412	0.00828044	-0.00164254	-0.0160272	-0.000178208	0.000230503	-0.00218688	-0.00344896	0.00701318	-0.00133403	-0.00185844	-0.00677201	0.000133964	-0.00247065	-0.00561285	-0.00118227	-0.00280954	-0.000257003
mBpby114	Soutern British	-0.0137382	-0.0234056	-0.0184087	0.007778	-0.0115258	0.0112122	0.00800864	-0.0131951	-0.0160485	-0.0066744	-0.0150052	0.00152227	0.0288554	-0.0148322	-0.0121017	0.0115879	-0.00138292	0.00258869	-0.00364174	0.0159529	0.00581367	0.0133777	-0.00577821	-0.00845792	-0.00423837	0.000508792	-0.0103841	0.00709605	0.00521111	-0.000443861	-0.00502094	0.00190687	-0.00894002	-0.00470375	0.00523677	-0.00676456	0.00918497	-0.00144239	-0.00375351	-0.00105646	-0.00758678	0.000815391	-0.00241904	-0.00243784	-0.000100408	0.00343397	0.00125355	0.000351691
mBpby118	Soutern British	-0.0213927	-0.0034259	-0.0248212	0.00211942	0.020598	-0.0064994	-0.0127618	0.000105655	-0.00651039	0.00878407	0.00249844	0.0225593	-0.00193181	-0.000183377	-0.00859761	-0.00440263	-0.0124942	-0.00829332	-0.00524485	-0.0199815	-0.00525587	-0.0055146	-0.00700662	-0.00137252	0.00297514	0.000729329	0.00201586	-0.00129481	-0.00813798	-0.0100875	0.00190879	-0.0045054	0.0104082	-0.00148113	-0.00481088	-0.00703018	0.00626172	5.52651e-05	-0.000484448	0.00515105	0.00255177	0.00453453	-0.00665905	-0.000624112	-0.000220596	0.00365028	-0.00087847	0.00242142
mBpby119	Soutern British	-0.00284876	-0.0206664	-0.0125099	-0.00153815	0.000837165	-0.00996899	0.0103013	-0.00722242	0.00382316	-0.00336197	-0.0135382	-0.0114383	0.00198582	-8.84443e-05	0.0183079	0.00548706	0.0149235	0.00116728	-0.00668144	-0.00729008	-0.0102138	0.00874223	0.00293291	0.0027751	0.0152381	-0.0048008	-0.0106039	0.00102333	-0.00414026	-0.000782955	0.00616972	0.00944768	-0.00141799	0.00332117	-0.00433188	0.00165228	-0.00292879	0.000811709	0.00303853	0.00077605	-0.00237306	-0.000278133	-0.000741786	-0.00372547	0.00229661	-0.0048848	-0.00122271	-0.00167516
mBpby142	Soutern British	0.0157848	0.015711	-0.0128543	0.00563213	0.00411155	0.0339307	-0.0017471	0.00929755	-0.00921794	0.00731088	0.0136203	-0.00320298	0.0183715	-0.00165102	-0.0226612	0.00845427	0.000432425	-0.00291566	0.0116661	-0.00856739	-0.0261236	-0.0190624	0.0225994	0.00810088	-0.0012032	-0.00228151	-0.0134497	0.00295	-0.00437676	-0.00255036	0.00265735	-0.00466054	-0.00537829	-0.00342748	0.00187525	-0.00316935	0.00230949	0.00563097	-0.00802887	0.00469909	0.000293716	0.00670913	0.0026652	-0.00744312	0.00197766	-5.55767e-05	0.000836661	0.00238314
mBpby143	Soutern British	0.0466636	0.047653	-0.0232417	0.0204844	0.0325984	0.0280816	-0.00198616	0.0177228	0.016464	-0.0135171	0.0127425	-0.00291423	0.00907443	-0.00875912	-0.00606959	-0.0100812	0.0209069	0.0192411	-0.0241685	0.00473177	-0.00580144	0.00956207	-0.0102087	-0.000515419	0.00582243	-0.00587817	0.00447596	-0.00823762	-0.000938099	0.002312	-0.00454082	-0.00494818	0.00274643	-0.00379998	0.00341388	0.00673227	-0.00414087	0.00450574	-0.00308967	-0.00338156	-0.00384265	0.00626901	0.00407914	-0.00517656	-0.00131501	-0.000579212	0.00205037	0.000238652
mBpby144	Soutern British	-0.00167819	-0.0185675	-0.00899184	-0.00275456	-0.0149692	0.0152014	-0.0117243	0.0295714	0.00299962	0.000330444	0.00675897	0.00112602	0.0183117	-0.000273914	-0.00877359	-0.024979	0.00394008	-0.0121489	-0.00671895	0.00130573	-0.00116393	0.00767329	-0.0078422	0.00396689	0.00182574	0.0106068	-0.00545416	-0.00924162	0.0118298	-0.00104402	-0.000661852	0.00424969	-0.0022797	-0.000717167	-0.0014155	-0.00252405	-0.00242048	-0.000333869	0.00115088	-0.00156955	-0.000258525	-0.00371289	0.00162238	-0.00361659	0.0052165	-0.00108592	-0.00147668	0.00270532
mBpby177	Soutern British	-0.0157928	0.0331485	0.0106829	0.013633	0.00149644	0.0174518	-0.00892397	0.00291554	-0.00325897	0.0154537	0.0162768	0.00787989	-0.0185819	-0.0101232	0.00796633	-0.0232426	-0.00321165	-0.00596524	0.00255093	-0.000724212	0.00880705	-0.000736523	-0.00368223	0.00279734	0.00530333	-0.000791003	-0.00961752	-0.000723677	0.00753785	-0.00598801	0.00137253	-0.000277589	-0.00016235	0.000207408	-0.00251734	-0.00164499	0.00340649	-0.00128192	-0.00269738	-0.000864642	0.00061569	-0.00070693	0.00879465	-0.000949122	-0.00334572	-0.00194502	0.0036292	-0.000972519
mBpby185	Soutern British	-0.0183172	0.0187683	-0.0025589	0.0218337	0.00698385	-0.00288181	-0.0208049	-0.011145	-0.0364957	0.0246492	0.0131494	0.000521869	0.00458451	-0.0160652	-0.00947406	-0.00578863	-0.00527645	0.0110782	0.00757075	-0.0165273	-0.00798255	0.00211689	0.014381	0.00100051	-0.0121592	0.015711	-0.00236326	0.00127718	-0.0131378	0.0112776	-0.00363492	-0.000962127	0.0052309	0.00123737	-9.9223e-05	0.0053375	-0.00266618	-0.00131846	-0.00508886	-0.0074602	-0.00118496	-0.00525961	-0.000691191	0.00302049	0.000255296	0.0017625	0.00439836	-0.00199124
mBpby207	Soutern British	0.00403998	0.00970268	-0.0233501	0.0069355	-0.02386	0.00087382	0.0247963	0.00537343	0.0153082	0.00221022	-0.00101442	-0.00805744	-0.00346633	0.00886612	-0.00384663	0.00521913	-0.000303961	0.00587002	0.000360155	-0.00480092	-0.00240592	0.00721204	-4.61791e-05	0.00394607	-0.00331228	0.00368783	0.00697229	0.00122118	-0.00147907	0.00251925	-0.0002437	-0.00667462	0.00710001	-0.00526971	-0.000418187	-0.000441488	-0.00174816	0.00988078	0.000147112	0.00111332	0.0013518	0.0015511	0.000562068	-0.0014509	-0.00216604	-0.00166484	-0.00246423	0.00275124
mBpby212	Soutern British	-0.0187572	0.0341944	-0.00250034	-0.00441016	-0.0319535	-0.00424728	-0.000170475	0.00915991	0.0117153	0.0112199	0.00852485	0.013991	0.015866	0.00248192	-0.0140866	-0.00265976	-0.00226186	0.0023153	-0.00483147	-0.00365057	-0.0113041	0.00644853	-0.00724574	-0.00530016	-0.00305929	-0.00116668	0.0034983	-0.0105326	0.00296381	-0.000120006	0.0063485	-0.000236468	0.00083012	-0.00269511	0.0046091	0.0103326	0.00749078	0.00443918	0.00401932	0.000717625	0.00764513	0.00196622	-0.000840677	0.00462552	0.000184507	-0.00527494	0.000943706	0.000160257
mBpby255	Soutern British	0.00838524	-0.0542152	-0.0153752	0.00282181	0.0320194	-0.011238	-0.0436733	0.00762796	-0.0082145	0.00159149	0.000464978	-0.00799943	0.0030383	-0.0154147	-0.0015671	0.00212942	-0.00284044	0.0063184	0.0141642	0.0122927	0.010756	0.00132233	-0.00478806	-0.00919255	0.00604802	0.00222603	-0.00621582	-0.00317745	-0.000737419	0.00292071	-0.000129579	-0.0101085	0.00120185	0.00274122	0.00522028	-0.00911584	0.00384161	0.00618628	-0.000593482	0.00251147	0.000271242	-0.000718122	0.000545861	0.000803739	-0.00477492	-0.000428836	0.000524899	-0.00374647
mBpby284	Soutern British	0.0252394	-0.0174339	0.0131578	0.0116856	-0.00192853	0.0111393	0.0106772	0.0233102	0.0347735	0.035957	0.0055621	0.00214304	0.00934797	-0.00140153	-0.00496137	0.00052267	0.00998498	-0.00530826	0.00419048	-0.0134252	0.00316436	0.00188938	-0.00698993	0.000591144	-0.00126959	-0.00329014	-0.00676104	0.00356375	-0.0055	0.00217459	0.00367971	-0.0052711	-0.000880587	-0.00193008	0.0055289	-0.010375	-0.00406208	-0.00266762	-0.00260352	0.000108	-0.00595063	0.00355284	-0.00252012	0.00360312	-0.000151474	-0.00103741	-0.0017577	0.003472
mBpby286	Soutern British	0.0817539	0.00176499	-0.016641	0.0103702	0.0186541	-0.0264465	-0.0242718	0.00557324	-0.0136923	0.013232	-0.0129262	0.00951432	0.00715543	0.00203058	-0.0100396	-0.00135008	0.0048562	0.0111583	-0.00241877	-0.00383101	-0.00385078	0.0046804	0.0111849	0.0134856	-0.00288686	0.000711806	-0.000827337	-0.00391252	0.0020306	0.00348916	0.00183538	-0.00178203	0.00105486	0.0058514	0.00095848	0.00151977	-0.000954718	-0.00324236	0.00586583	-0.0018377	0.00625462	-0.00459834	-0.000154592	-0.00472804	-0.00270667	0.00614115	-0.0049726	0.00231783
mBpby290	Soutern British	0.0307403	0.0204124	0.0166538	0.014298	0.0020716	0.015121	0.0031776	0.0018062	-0.0102981	0.0232735	0.00389256	-0.012548	-0.0213272	-0.0170148	-0.00616199	-0.00589745	-0.00341874	0.0156398	0.0112538	0.00827393	-0.00189377	0.00478061	0.0118786	-0.00665554	0.00251421	-0.00310192	0.004064	-0.00604355	-0.0101327	-0.00734039	0.00205709	-0.00374352	-0.00592204	0.00941424	-0.0108646	-0.00544416	-0.000518095	0.00500362	-0.00212783	0.00725744	-0.00131729	-0.00165703	-0.00226479	0.00381624	-0.00192203	-0.00401815	-0.000392949	0.00263881
mBpby298	Soutern British	-0.00400243	-0.0124169	0.00596938	-0.0443099	-0.0092674	-0.00233112	0.02175	0.0034886	-0.0266962	0.0401709	0.0104428	0.000653207	0.0216772	0.0037964	-0.00936683	0.00759039	0.0112272	-0.000176462	-0.00615049	-0.00953612	-0.0138372	0.0166701	0.00108116	-0.000225751	-0.00268552	-0.0051172	-0.00723816	0.00590824	0.00381756	-4.70013e-05	-0.00260556	-0.0049385	-0.00331046	0.00427425	0.000463728	0.00487091	-0.00719658	0.00553236	-0.00492548	0.00254335	-0.00139279	0.000420248	0.000176437	0.000298181	-0.000214988	-0.00260997	-0.00531295	-0.00346615
mBpby381	Soutern British	-0.000471902	-0.00474913	-0.00267476	-0.0325017	0.0020513	0.024951	0.0146709	0.0171732	-0.0154147	0.00642704	-0.00669681	0.00296576	0.00468463	-0.0100806	-0.0104275	0.00291376	0.0208695	0.0182736	-0.00245509	-0.0115375	0.00285353	0.00107008	-0.00287739	0.00645214	-0.00672169	-0.00343186	0.0143644	0.00591817	0.00125554	0.00469016	0.0109226	-0.00238676	0.0066408	-0.00132461	0.00103422	-0.00184492	-0.00233891	6.43141e-05	0.000952661	-0.000535629	0.00171883	0.00425576	0.00415477	0.0030281	0.00340161	0.00236314	-0.00249917	0.00307295
mBpby392	Soutern British	-0.000522463	0.000494922	-0.0143814	-0.0130952	-0.0258675	-0.00148892	0.0243413	0.00843458	-0.00572026	0.012991	-0.015414	0.00342974	-0.000659209	-0.00881444	-0.0152611	-0.0109298	0.0123645	0.00337685	0.00545531	0.00444333	0.000699838	0.00898342	0.00381529	0.0165869	0.000355694	0.00977828	-6.98887e-05	0.00934992	-0.00478898	-0.00408362	0.00562899	-0.00401695	-0.00488187	-0.00463436	-0.000372744	-0.00647342	-0.000338278	8.18301e-05	0.00270647	0.000710002	0.00198501	-0.00676103	0.000867182	-0.00403747	0.00078381	0.00104232	0.00218131	0.000454231
mBpby393	Soutern British	-0.012011	0.0319164	-0.0346432	0.0119007	-0.00448252	-0.0126255	0.00251207	0.0180335	-0.00324656	-0.0145795	-0.00701073	0.0072004	-0.00508013	-0.01329	-0.00334051	0.00707952	0.00197325	0.00626274	-0.00870319	0.00656221	-0.0122453	0.00609874	-0.00503538	-0.00183539	0.0118033	0.00266453	-0.00589587	-0.00795453	-0.00231783	-0.000782073	-0.00466639	-0.00933517	0.00658422	-0.00229213	0.00438284	0.000255007	0.00521494	-0.00376473	0.00437143	0.00385216	0.00284732	-0.0019199	0.00454805	-0.00106746	0.000468211	0.0019655	0.000611509	0.00181545
mBpby401	Soutern British	0.0212582	0.0206591	-0.00609749	0.00439796	0.0282641	0.0144823	-0.0265878	-0.0119223	-0.00327897	-0.0113197	-0.0154138	-0.000891299	0.0023118	-0.00241459	0.001808	-0.006022	0.00216452	3.67727e-05	-0.00153219	-0.00656457	-0.0103772	0.00311616	0.00189527	0.00497732	0.00419945	0.00202522	0.000302197	-0.0116267	0.00236533	0.00495939	0.00104275	-0.00183532	0.0118281	0.00444803	0.00111509	-0.00344046	0.00435781	-0.00184289	0.00322626	0.003577	0.0022152	-0.00386424	-0.00379289	0.00692666	0.00282078	-0.00393771	0.00345786	-0.000830274
mBpby403	Soutern British	0.0272314	-0.0477013	-0.0125624	-0.012051	0.0121496	0.0282756	-0.0276511	0.0220043	-0.020747	0.000472934	-0.0106354	-0.0163819	-0.0162992	-0.00543756	-0.0114518	0.00208657	0.00651929	8.51708e-05	-0.010559	-0.0127558	0.000265527	0.000184581	-0.00605755	-0.01008	0.0033271	-0.022587	-0.00793079	0.00807098	-0.00647294	-0.0016532	0.0108137	0.0041378	0.00291787	0.00870442	0.00172321	0.00646257	0.00861595	-0.00115354	-0.0033507	0.00227851	0.000384273	0.00273421	-0.000756162	-0.003941	0.00121616	-0.00219793	-0.00210224	0.000679926
mBpby650	Soutern British	0.00370399	0.057506	-0.0276582	-0.000587972	0.00647553	-0.00588765	0.00110685	-0.0034387	0.00258678	-0.0112949	-0.0214788	-0.000162174	0.00127685	-0.0168597	0.00972105	-0.0118863	0.000877909	-0.00681451	-0.000314183	-0.0120913	0.0008355	-0.014064	0.00527528	-0.00937619	-0.0118204	0.00832308	0.0124473	0.00546864	0.00125776	-0.00351517	-0.00325861	-0.00768511	-0.00125016	0.00675466	-0.00368183	0.000833013	0.00762982	0.00309583	-0.00326318	-0.00117886	0.00211927	-0.00246057	0.00305616	-0.00568876	-0.000225916	-0.000148666	0.000403321	0.000841939
mBpby658	Soutern British	0.0618789	-0.0197423	-0.0391394	0.00882989	-0.0278225	-0.0340942	-0.017002	0.00998068	-0.00297769	-0.00886882	-0.00463823	-0.0135716	0.00296107	-0.000960402	-0.0282036	-0.00255141	-0.00185315	-0.00844191	0.00428575	-0.000278648	0.00486847	-0.000333275	0.0047107	0.00638696	-0.00150993	-0.0023928	0.00297748	0.00401585	0.00387957	-0.00158453	-0.00562659	-0.00578903	0.000598944	0.00528377	-0.0029955	0.00357596	-0.00258463	0.00269875	0.0041572	-0.0038822	-0.00678014	0.000488292	0.00494496	0.00322379	0.00386325	-0.00220424	-0.00188307	-0.00492912
mBpby1225	Soutern British	-0.00597349	0.00282986	0.0203139	0.0162615	0.0021911	0.0255141	0.00267985	0.00962872	0.00345991	0.0118982	-0.00672113	0.00837565	0.00439499	-0.0153724	0.0093596	-0.0158624	-0.00155392	0.00659266	-0.000299947	-0.00821273	0.00403959	0.00324068	0.00566026	-0.00210679	0.00631335	-0.00435459	0.00288061	-0.0057915	0.000528767	-0.00797014	-0.000378748	-0.00883824	-0.0114994	0.00162965	-0.00173706	0.00299466	-0.001986	-0.00237819	0.000808547	-0.00452177	-0.00357134	-0.000197561	-0.00358918	0.00340122	0.00347016	0.00161749	0.000230328	-0.0031984
mBiiroAc	Scottish and Irish	-0.0219486	0.00485599	0.000602589	-0.0424306	-0.0118727	0.0138293	-0.0128983	0.0173078	0.00707925	-0.00756309	-0.00308793	-0.00420082	-0.00539941	0.0263689	0.00735137	-0.00350114	-0.00236664	-0.00895952	0.000845379	-0.00592542	-0.00206891	0.00584355	0.00446492	0.00658065	-0.00124945	0.00136273	0.00522515	0.00112744	0.00407404	-0.00103926	-0.000702229	-0.00568002	0.00187274	-0.000302161	-0.00845667	-0.000896761	-0.00406961	0.00551314	0.00224928	0.00513762	-0.00246905	-0.000462725	-0.00111947	0.00569818	-0.000659713	-0.000613761	-0.000732683	-0.00535617
mBiiroB385	Scottish and Irish	0.0111767	-0.0323367	0.0258086	-0.00081013	0.0238913	-0.00628555	0.00914013	0.0220316	0.00398081	-0.0185788	0.00097516	-0.0125392	-0.000972901	0.0104213	0.00552401	0.000644178	0.00480152	0.0076448	-0.0162666	0.00778481	-0.00433833	0.00327821	-0.0148252	0.0100941	-0.000926293	0.0018201	0.00563851	0.00884391	-0.00700633	0.00744256	0.00751224	-0.00262392	0.00624999	0.0113457	-0.00144144	-0.00155606	0.00198069	0.00114244	-0.00818237	0.000233667	0.00173794	-0.000147426	-0.00085649	0.000145713	-0.00430284	-0.00123396	0.00414213	-0.00359636
mBiiroGt	Scottish and Irish	-0.0184868	0.0123544	0.0216068	0.00574152	0.0037032	0.000919862	0.000120502	0.00509752	0.00737784	0.0050323	0.00306935	-0.00100577	0.00514651	0.0159526	-0.0170092	0.00457137	0.00167376	-0.00238602	0.00522112	0.0120645	-0.00231906	0.0106989	0.000421388	-0.000740978	0.00699422	-0.000712553	-0.00149944	0.00263595	-0.00344047	0.00374912	-0.00107646	-0.00124341	0.00600893	0.00384541	-0.00308493	-6.02245e-05	0.00404655	-0.00682532	0.00348122	-0.00291724	0.000110459	-0.00246119	0.00105677	0.00110712	-0.000284951	3.76012e-05	0.00274086	0.00197322
mBiiro966	Scottish and Irish	0.0120231	0.00414805	0.0210802	-0.0212061	0.0045643	-0.00424724	0.0087247	-0.00551952	0.00398208	0.00358235	0.00337907	-0.0228241	0.000561139	-0.00025062	-0.00999139	0.000761696	-0.00425929	-0.0180569	-0.01177	-0.00104381	0.00415826	0.00253997	0.00525248	0.000882894	-0.00529518	-0.00625972	-0.001928	-0.00203109	0.0012104	0.000235202	-0.00524843	0.006223	-0.0012651	0.00433017	-0.00165937	-0.00503619	-0.00318544	-0.00429484	-0.000532259	-0.00233432	0.00136469	0.0047836	0.0018056	-0.0022138	-0.000344189	-0.00242488	0.00150763	-0.000816156
mBiiro986	Scottish and Irish	-0.00349507	0.0249015	-0.0227737	-0.00749312	0.00480125	-0.00296796	0.00547649	-0.0250224	0.00658446	0.003675	-0.00615089	0.00689208	-0.0099493	-0.000549702	0.00422212	0.0146533	0.00109204	0.00698397	-0.008567	0.00374397	0.00767845	0.00668631	0.00689764	-0.00940218	0.00678497	0.00529884	0.00566409	0.00775771	-0.00164543	0.00498372	0.00233682	0.00471089	0.00250819	0.00107621	0.00349846	0.00361415	-0.00716573	0.00145861	-0.00669011	0.00410725	0.00206142	-0.00173942	-0.00710193	0.000117712	-0.00371913	-0.00307516	0.000311882	0.0049678
mBmdc69	Southern British	-0.00340988	0.00770266	-0.0253914	0.0130198	-0.00702704	-0.0120084	-0.00303483	-0.00192024	0.00395393	-0.00264738	-0.0151969	-0.0171433	-0.0131625	-0.00649072	0.00105458	-0.00256703	-0.0073568	-0.000772384	-0.00179198	0.00507567	-0.00785822	-0.00204346	-0.00917158	0.0038839	-0.00111497	0.0115185	0.00260438	0.000934418	0.00529603	-0.00998544	-0.000873344	0.0028896	-0.0015603	0.00115054	0.00552835	0.000832402	-0.00237353	0.000971854	0.00541595	0.00434372	0.0104049	-0.00748574	0.00500411	0.00160509	-0.0058958	0.00069852	0.00104151	-0.0051132
mBmdc80	Southern British	0.0120945	-0.00538648	0.02009	0.0274189	-0.00126894	-0.0045624	0.0216126	0.0153003	0.0229746	-0.00060439	-0.00609229	0.0135316	-0.00484202	-0.0110457	0.000299843	0.0211348	-0.00956029	0.000473931	0.00601019	-0.0102262	-0.00278914	0.00607363	-0.000305869	-0.00544883	0.000683026	-0.00296301	0.00498497	-0.00111161	0.00964943	0.00553835	0.00878842	0.000968999	0.00304365	-0.00101963	0.0018422	-0.0030912	0.00423729	0.00465152	-0.000640888	-0.00100491	-0.0104901	-0.00186941	-0.00258934	-0.000627608	-0.00516712	-0.0038632	0.00193209	-0.00314048
mBmdc92	Southern British	-0.022057	0.0227185	-0.00568306	0.00773029	-0.00641157	-0.00111831	-0.0178538	-0.00979582	-0.00260188	0.00503031	-0.0174116	-0.0120559	0.00591968	-0.0109861	0.00344255	0.0196399	0.00858608	-0.00270818	-0.000735196	0.00660235	0.00367169	0.00165024	0.00992077	-0.0128321	-0.00102384	-0.00303169	-0.00266356	-0.00338304	0.00205786	0.00166897	-0.0043317	-0.000899484	-0.00123699	-0.00073312	0.00374726	-0.00465616	-0.00315	0.0052886	-0.00152061	-0.00410404	0.00427138	0.00376226	-0.00011187	-0.000573321	-0.00226646	0.00025173	-0.00193381	-0.00202841
mBmdc94	Southern British	0.0108486	-0.024409	-0.0198351	-0.00463172	-0.0179475	-0.00708194	0.00563864	-0.0165966	-0.00494736	-0.0185661	-0.0109987	0.0149299	0.00818992	-0.00518224	-0.00297364	0.0109725	0.0101819	-0.00254081	8.3461e-07	-0.00289171	0.00750102	-0.00938275	6.88096e-05	0.000855639	0.00459009	0.00496298	-0.00711693	-0.00517526	0.00891219	-0.00378452	-0.000205465	-0.00141642	0.00409707	-0.000251831	0.00361356	0.000748602	0.0013088	0.00371098	4.04927e-05	0.000837882	0.00267524	-0.00622489	-0.00211538	-0.00334818	-0.00211515	-0.00408827	0.000300953	0.000388845
mBmdc95	Southern British	-0.00562277	-0.016685	-0.0161088	0.00436193	0.0317234	0.0234406	-0.00258004	0.0129777	-0.0285764	0.00159091	-0.0067096	0.00936562	0.0190878	0.0135083	0.0105544	0.00713726	-0.00283601	0.0024759	0.00616131	-0.00310785	-0.00316838	-0.00766221	-0.0072168	-0.00177271	0.00343669	-0.00134904	0.00684116	-0.00237194	-0.000592071	0.00743513	-0.00146346	-0.00200231	-0.00311281	-0.00552038	-0.00115722	-0.00478054	-0.0036499	-0.00582863	0.00683868	-0.00533228	0.00520775	0.00251712	0.00214272	0.00203972	0.00268861	-0.0066044	-0.00137131	0.00427317
mBmdc97	Southern British	-0.019674	-0.000814556	-0.0125348	0.0137703	0.0147727	0.0328919	0.00535788	0.0147644	-0.00828529	-0.00362987	-0.004778	-0.0153459	-0.0090018	0.00570119	-0.00533764	0.000834142	-0.00824192	-0.00833647	-0.00805869	-0.00208815	-0.000597704	-0.00305153	-0.00482902	0.00395996	-0.00982716	0.00367365	0.0112809	0.00504363	0.000707753	0.00735591	0.00392534	0.00120202	0.00266207	-0.00291714	-0.00513503	-0.000555764	-0.000913208	-0.00541903	-0.00302532	0.0023886	-0.00451449	-0.00469001	0.00308147	-0.00116381	-0.000144549	3.78426e-05	0.000685649	-0.00262937
mBmdc98	Southern British	0.00247307	0.0244058	0.0239445	0.000937405	-0.0105205	-0.00303864	-0.00181928	0.0158748	-0.00956792	0.0127188	0.00804385	0.00823829	0.00261222	0.0053827	0.000358797	0.00752963	0.00392111	-0.00129716	0.00770145	-0.00137922	0.0181823	0.00305126	-0.000600744	0.00318483	-0.00519122	-0.000496925	-0.00648222	0.00647604	-0.00584191	-0.00265501	0.00611884	-0.00859678	-0.00261433	0.00548483	-0.00242338	-0.0043522	0.00087702	-0.0046882	0.0050388	0.00167392	0.000690026	-0.00300825	0.00550926	-0.00334203	-0.00110345	-0.000944019	-0.000588037	-0.00223028
mBmdc105	Southern British	-0.0417385	0.0482485	-0.0157667	-0.0244247	0.00325692	-0.0127189	-0.0100267	0.00210245	0.00398613	0.0176653	-0.00651934	0.00492621	0.00759416	-0.0108886	-0.00396014	0.00272878	0.00591702	0.00106481	-0.00942563	-0.0110122	-0.00783083	-0.00278549	-0.004496	-0.0103292	0.00423215	0.00639924	0.0053424	0.00372443	0.00968879	0.00623656	-0.00338771	0.00306943	-0.000798998	9.92589e-05	0.00629452	-0.00163052	0.0021193	-0.00098445	0.00323485	0.00332587	-0.00470334	0.00556048	0.000697933	0.00611037	-0.00126309	-0.00171139	0.000366126	-0.00332541
mBmdc110	Southern British	0.00581081	-0.0322507	0.0329764	0.0247294	-0.00291592	-0.00675775	-0.00745718	-0.00862892	0.00607874	-0.00834376	-0.0102593	0.00684974	-0.00490152	0.000412646	-0.00269893	0.0095732	-0.00931525	0.00130511	0.0023907	-0.0104941	-0.000325227	0.0022414	-0.00259331	-0.00398769	-0.00235822	-0.00196615	-0.00393934	0.00415338	0.0030389	0.00291339	0.00102276	-0.0044845	-0.0066617	-0.0037539	0.0015519	0.000329826	0.00506809	-0.0101306	0.00252075	-0.00636206	-0.00692228	0.00271843	-0.00619083	-0.000755156	-0.00346564	0.000580262	0.00565541	-0.000649469
mBmdc112	Southern British	0.00152695	-0.0125646	0.0237752	-0.0106041	-0.00148468	0.0135427	0.00409004	-0.00233021	-0.0116978	0.0078464	-0.0103466	0.00362263	-0.0336399	0.00951099	0.00060143	0.00749917	0.00538665	0.00683393	-0.00605268	-0.0112855	-0.010511	-0.0054778	0.00639458	-0.00377626	0.00592113	-0.00609899	0.00295433	-0.00332412	0.00877124	-0.00390368	0.00102755	-0.000845374	-0.00159848	-0.00199309	0.00169548	-0.00487782	-0.00422467	0.000507618	0.000724492	-0.00150843	0.00100251	0.00181205	0.00402223	-0.00686297	-0.00243043	0.0032991	0.00385412	0.000246361
mBmdc71	Southern British	0.00139202	0.00235685	0.0139648	0.00660033	-0.0171238	-0.0158816	0.000815396	0.00972709	-0.0176628	0.0256325	-0.0135395	-0.00601408	1.83945e-05	0.000291095	0.00366803	0.0138868	-0.00671109	0.00366043	0.00762801	0.00705988	-0.00585274	-0.0134667	0.000139471	0.00130945	-0.00373374	-0.00688359	-0.00189697	-0.00287844	0.000756623	0.000693856	0.00239111	0.00104658	-0.00320189	-0.00311051	0.00122467	-0.00241036	-0.00292925	-0.00383818	-0.0105813	-0.00289021	-0.000370546	0.00111887	0.00284163	-0.00113225	0.00146246	-0.000245098	0.00119837	-0.00411405
mBiir973	Southern British	0.0264089	0.0188269	0.0118003	-0.0167396	0.0115011	-0.0141406	0.00531645	0.0182361	-0.0100366	0.00893914	-0.000994246	-0.00963644	-0.00912764	0.00715863	0.0165773	0.000154029	0.00854053	0.00531158	-0.00337046	-0.00161111	0.004762	0.0100989	-0.0054508	0.0128512	0.00134852	0.00582707	-0.00494274	0.00250441	0.000687357	0.00361914	-0.00123018	0.00122475	-0.000898585	-0.0092408	-0.0102328	0.00641028	-0.00371975	0.0029183	-0.0015014	0.00345464	-0.00382682	-0.00251946	0.00401358	0.00512327	-0.00299646	0.000781902	-0.00103431	0.0015359
mBmdc63	Southern British	-0.00614281	0.0178446	-0.00941344	0.0204877	0.00830037	-0.00405153	0.0160531	0.00391835	0.0165962	-0.00617272	-0.00687846	0.00487846	0.0072943	-0.00136458	0.00472822	0.00240089	-0.00675731	0.0108789	-0.001051	0.00521259	0.00636946	0.00327649	0.00267771	0.00321183	0.00857231	0.00384047	-0.00275063	0.0109423	0.000991553	-0.00547223	-0.00439732	0.000400595	-0.00120768	-0.00660537	-0.00339827	0.00760203	-0.00198369	-0.00218956	0.0022554	0.00493818	-0.00372318	0.00393791	0.00199144	-0.00174747	0.000242813	0.0016012	0.00124872	0.00337654
mBmdc74	Southern British	-0.018339	0.0111999	0.011064	0.0250074	0.0216754	-0.00226796	0.0196851	0.0122865	-0.0112213	-0.0096934	-0.0135331	-6.41617e-05	-0.00134741	-0.00756382	-0.00591649	0.013834	-0.00819864	-0.0112879	-0.0120929	0.00169881	0.00562172	0.0030583	-0.000982034	0.0144559	0.0122028	0.00250101	7.92714e-05	0.00351128	0.00169213	-0.000792285	-0.00487948	0.00189014	0.00277366	-0.00893338	-0.00952218	0.00365739	0.00499361	-0.00354621	-0.00514076	0.00102263	0.000160775	0.00273499	-0.00118783	0.00154836	0.00149965	-0.00078025	-0.00309875	-0.00139352
mBmdc90	Southern British	0.0335889	0.00863763	0.0192798	-0.00800519	0.0136276	-0.0204602	-0.00599116	0.00105338	-0.0188831	-0.00501403	-0.0085573	-0.0170056	-0.00959006	0.000598125	-0.0136554	-0.00198478	-0.00554359	0.000545416	0.00997835	-0.00789541	-0.00067103	-0.00586156	-0.0116603	0.00140535	0.00734499	-0.00236321	-0.00132098	-0.00223954	0.000294837	0.0109954	-0.006786	0.00467994	0.00016295	-0.00646888	-0.00151898	-0.00108631	0.0131815	0.00406821	-0.00177496	-0.000794342	0.00609716	-0.00277518	-0.00199103	0.00207742	-0.000210369	0.00319817	0.00162928	0.00198269
mBmdc102	Southern British	-0.00488298	0.000884193	0.0154789	0.0306719	0.012324	-0.016812	0.00569419	0.0244265	0.00236201	0.023516	0.00254784	-0.00997649	0.00784234	0.00773387	0.0119766	-0.00477384	-0.0106223	-0.011174	-0.00590317	-0.000130996	0.00760952	0.00708341	0.00587725	0.00581079	-0.00516585	0.00641243	-0.000565303	-0.00146816	0.00554546	0.00107401	0.000532571	0.0025918	-0.00240345	0.00410025	0.00406213	0.00207649	0.00334446	-0.00308237	0.00183537	0.00191161	0.00324266	-0.00157794	-0.00235044	-0.00027305	0.00382838	0.000965933	0.00170686	7.17877e-05
mBmdc104	Southern British	-0.0191907	-0.0058503	0.0272963	0.0225601	0.0148828	-0.0168583	-0.010352	0.00586447	-0.00455683	0.00589251	-0.035673	0.0158089	-0.00608756	-0.00378131	-0.0257822	-0.0112532	-0.0073741	-0.00511152	-0.0043394	0.000901049	-0.000679339	0.0045896	-0.000955634	0.00828269	0.0155077	-0.00826405	-0.00128415	0.00699749	0.00193186	-0.00201911	-0.00920289	0.0047119	0.000967579	-0.00643691	-0.000581858	-0.000576359	-0.00441954	0.00706221	-0.00325496	0.00154353	-0.00138081	0.00150738	-0.0040265	0.00408313	-0.000849526	0.00152402	0.00312713	-0.000215537
mBmdc70	Southern British	0.0158427	-0.0104193	0.0260076	-0.00932659	-0.0252201	0.0010208	0.0149608	0.00119936	-0.00571829	-0.00313955	-0.00825644	-0.00784921	0.00832673	0.00446001	0.0052067	0.00720585	-0.00345781	0.00139943	0.00217887	-0.01353	0.00931129	0.00302306	0.00713054	-0.00293253	0.0063518	-0.0057999	-0.00561001	0.00825288	0.00221116	0.00288063	0.00264609	-0.00263527	-0.00456096	0.00172394	-0.00208463	0.00216086	0.00691482	0.00530386	0.00435952	-0.00348066	-0.000683563	-0.00452253	-0.000429207	0.00178951	0.000857595	0.00340597	-0.00196993	0.0023929
mBpby19	Southern British	0.00319033	-0.00437947	-0.00701853	0.00699994	0.0355243	0.0233698	0.00983773	0.00481941	-0.0250475	0.013214	0.00451645	0.0025027	-0.0010761	0.00161771	0.00419513	0.00289589	-0.00619867	-0.0130717	0.00201021	0.00825821	0.0042701	0.00668976	0.00846111	-0.0102515	0.00467401	-0.00272401	-0.00227841	0.00407881	0.00749523	-0.00285045	-0.00392743	0.00880397	0.00871419	0.00217983	0.00678249	0.000530009	0.00184098	0.00337452	0.00124967	-0.000982448	0.00133548	-0.00172208	-0.00477017	-0.00181664	0.00395801	0.00151025	-0.0022901	0.00100575
mBpby109	Southern British	0.0328431	-0.0451487	0.000574776	-0.0273076	0.0173966	-0.0185239	-0.0155136	0.00334868	0.0189143	-0.0118847	-0.00320111	0.00308752	0.00478734	0.00177689	-0.0064048	0.0166204	0.00072031	-0.00430907	-0.00892598	0.00228797	0.00183267	0.00177603	0.00770523	0.00399441	0.0051011	0.00227269	0.00156638	0.00468523	-0.000847904	0.000446305	-0.00328069	0.00012628	-0.000476512	-0.00393561	-0.00789576	0.00168113	-0.000876252	-0.00370583	0.00681578	0.00184575	0.00142994	0.00513999	0.000405207	0.000703221	0.00185043	0.00351351	0.0024193	-0.000367834
mBpby113	Southern British	-0.0229445	-9.10555e-05	0.000434705	-0.000996489	-0.0206649	-0.0210618	0.00433227	0.0217096	-0.00208312	-0.0138075	7.26721e-05	-0.00667466	0.000256767	-0.0109349	0.00188239	-0.00342811	0.00814269	0.00171906	0.003126	0.00218806	0.000747778	-0.0100182	-0.00129308	-0.000666077	0.00390161	0.0099566	-0.00172825	-0.000103658	-0.00497041	-0.00202973	0.00314016	0.00828062	-0.0019512	0.0064657	-0.00402348	0.000802265	-0.000510156	-0.00491796	0.00602662	0.00552433	0.00276708	0.00145501	0.000813444	0.00206392	0.00235617	-0.0030481	-0.00205333	-0.000365271
mBpby208	Southern British	-0.0167604	0.00399623	-0.0033365	-0.0208814	0.00230435	-0.0386816	-0.0197798	-0.0107385	-0.0277945	-0.02405	0.00366146	0.0083923	0.025996	-0.0118753	-0.00809974	0.00426271	0.000494792	-0.00029877	-0.00479038	0.00162476	0.00607193	0.0105189	-0.00950965	-0.00129606	-0.00238694	0.00368873	0.00336814	0.000501784	-0.00179103	0.00594271	0.00191405	-0.00547633	-0.00703743	0.00675724	-0.00398465	-0.00154839	-0.000865632	-4.68297e-05	0.00369036	0.00756778	-0.0060449	-0.00251319	-0.0026456	0.00235429	-0.00208446	-0.0033007	-0.00240191	0.00213905
mBpby221	Southern British	-0.0191911	0.00585726	0.00520431	-0.00450245	-0.00492516	-0.0113731	-0.00866118	0.00487492	-0.0267472	-0.00666435	-0.00194144	0.0132567	0.00937412	-0.00487887	0.00169034	-0.00368761	-0.00610915	-0.0100125	0.00152174	-0.00768497	0.00444599	0.0078533	0.0022606	-0.00719961	0.000385526	-0.00685183	0.00376759	-0.00535821	-0.00331813	-0.0117596	-0.000936483	0.0053014	0.000103581	3.05899e-05	-0.00286439	0.00297852	-0.00571298	-0.00871839	-0.00250221	0.00201053	-0.000247851	0.000214896	-0.000176303	-0.000434246	-0.00426283	0.000811746	-0.000273893	0.00303735
mBpby247	Southern British	0.0209246	-0.00871474	0.0138581	-0.027383	0.00855337	-0.00229462	-0.0241429	-0.00410772	-0.017608	0.00958544	0.0155088	-0.00402443	-0.0043897	0.00357707	-0.00625325	-0.00923613	0.0019238	-0.00917257	-0.0123421	0.0102359	0.00642878	-0.00564106	-0.00496656	0.00120225	-0.00278386	0.00621175	0.00485882	-0.00648146	-0.00418874	0.00648565	0.00334406	0.0134674	0.00413735	-0.00396966	0.000247451	-0.000475081	0.00263414	0.00206982	-0.00462947	0.00443703	0.00193638	-0.000359121	0.00513819	-0.00214398	0.00342273	0.00313242	0.00169252	-0.00439293
mBpby277	Southern British	-0.00175462	-0.00409489	-0.00769463	-0.0246677	0.015395	-0.0167449	0.0106173	-0.00757198	-0.00984747	-0.00966543	-0.0137139	-0.0149197	-0.00466796	-0.0326115	0.0308385	-0.00878308	0.00747598	-0.000637983	-0.00327911	-0.00410678	-0.00947707	-0.00698167	-0.000175066	0.00367462	0.00437667	-0.00286599	-0.0187861	0.00347752	-0.00429736	0.0128906	0.00217922	0.0078393	0.00207746	0.00330258	-0.00111939	-0.00187395	0.00126654	-0.00687228	-0.00195106	-0.0058747	0.00149105	0.000386587	-0.00235541	-0.00089048	0.00050288	0.000428028	-0.000837904	-6.36602e-05
mBpbyhgr1347	Southern British	-0.00706124	-0.0159218	-0.00150339	0.000317696	0.00330895	-0.031747	-0.016318	0.00682644	0.0113993	-0.00168917	-0.00229964	-0.00507826	-0.0162249	0.00735451	-0.0030098	0.0032108	-0.00236007	-0.00380706	0.00188107	0.00305611	0.0034352	-3.80052e-05	-0.00357086	-0.00939451	-0.0155174	-0.00812747	0.0115473	0.00570005	-0.00876473	0.00242794	-0.00302319	0.00534808	0.00225876	0.00390179	0.00294714	-0.000175803	-0.0015656	0.00092967	0.00704434	-0.00419163	-0.00562517	0.00671227	0.00481611	0.000997197	-0.00263822	0.00120181	-0.00486836	0.00467041
mBpbyhgr1887	Southern British	-0.0657889	-0.0352671	0.00435814	0.00408967	0.0278008	-0.007029	-0.00665547	-0.0194006	0.00529152	-0.00937379	0.00278626	-0.01916	0.0075991	-0.00138328	0.00632321	-0.0049431	-0.000918482	0.00929532	0.00406986	-0.0109272	-0.0131622	0.00415365	-0.00950842	-0.0139193	-0.00296718	0.00366404	0.0100992	-0.00489177	-0.000200063	0.000838797	-0.00235834	0.000848249	0.00429274	-0.00565404	-0.00824848	0.00494	-0.00336336	-0.00239709	0.000904788	0.00580309	-0.00132425	-0.000493243	0.00171546	0.0010314	-0.000196198	0.00275771	-0.000489647	-0.00195738
mBpbyhgr1983	Southern British	-0.029639	0.00614893	-0.0150599	-0.0196942	-0.000438867	0.00120527	-0.00288589	-0.034265	-0.00571479	-0.0214195	-0.0142154	-0.00391527	-0.0117419	0.00386685	-0.000117925	0.00152429	-0.000597397	-0.00305884	0.00549926	-0.0144074	-0.0134093	0.0136775	0.00331748	0.00751384	-0.00838848	0.004787	0.000951895	-0.000909024	0.0109629	0.00509158	-0.00231734	-0.00443896	0.005418	0.00534717	-0.00545889	-0.00117221	-0.00749497	-0.00648279	-0.00482641	0.000933978	0.000736079	0.00932963	-0.00130872	-0.000675272	-0.00296913	0.00384335	-0.000889	0.00175081
mBpbyhgr2045	Southern British	-0.0206621	-0.000184092	0.000137295	-0.00262029	0.0126632	0.0125716	-0.0424731	-0.022103	0.0123703	-7.32123e-06	0.00307591	0.0120619	0.00425086	-0.00440271	0.0291536	-0.00477512	0.00360791	0.00108301	0.00931796	-0.00643712	0.005339	0.00473426	0.0141993	0.00528316	-0.00384397	-0.00316225	0.0033929	-0.000216468	0.00454436	0.00564589	0.00182075	0.000935653	-0.00359439	0.00588282	0.00655505	0.00391082	-0.00569712	0.00328454	-0.00298301	0.00197504	-0.00126107	-0.000335706	0.00355893	-0.000363348	-0.000386519	0.00559417	-0.0012101	0.00172462
mBiirph	Scottish and Irish	-0.00156391	-0.00959647	-0.0297563	0.0447416	0.0167445	-0.017053	0.00587247	0.00472694	-0.0023958	0.0033457	0.00700952	0.00562125	-0.000183027	-0.000151044	0.00432572	0.00735134	-0.0129628	-0.0124862	-0.00471113	-0.0115392	-0.00457906	-0.00656869	-0.0050804	0.00368976	0.000341864	-0.000728509	0.00535651	0.00433739	-0.00585071	0.00141792	-0.00148213	-0.00621188	-0.00534089	0.00741943	0.00108951	0.00271836	-0.00881019	0.00207923	0.00420609	0.00561392	0.000220479	-0.0029978	3.55489e-05	-0.00376703	0.0011483	0.000951597	0.00210894	0.00527806
mBiirWB	Scottish and Irish	0.00461176	0.00592529	-0.0189357	0.0185145	0.0348081	-0.00943124	-0.0166828	-0.0127702	0.00104688	-0.00615363	0.00174157	-0.00404907	-0.0149831	0.00770812	0.000217026	0.0146919	0.00870158	-0.00805765	0.00717158	0.00522666	-0.00842047	-0.00385564	-0.00382827	0.00578912	0.00533626	0.00196555	-0.00968093	-0.00129893	-0.00780298	0.0052176	-0.000173452	-0.00415027	-0.000285478	-0.00456186	0.00467621	-0.00766518	-0.000363199	0.000731467	0.00795647	-0.00671147	0.00166364	-0.00193532	0.00100821	0.00421389	-0.00170339	0.00149303	0.000141425	0.00203448
mBpmk30	Scottish and Irish	0.0264189	0.0174019	0.00848962	0.025031	-0.00300646	0.00286911	0.00771597	0.0152065	0.00290411	-0.00453971	0.00600061	0.0034952	0.000750254	-0.00884501	0.0131361	-0.01116	-0.00223267	0.0101586	-0.0010574	-0.00392948	-0.00822013	-0.0105216	-0.0169897	0.00153953	-0.00804235	0.00584259	-0.0060484	0.00923562	0.00415221	-0.0101938	-0.00753997	-0.00478885	-0.00562359	0.00740094	-0.0079823	-0.00614134	0.00742647	0.00557871	-0.006242	-0.00218714	0.00732292	-0.000991363	-0.000896804	0.00560033	0.00187902	0.00666607	-0.00287257	-0.00032257
mBpmk31	Scottish and Irish	0.0199958	-0.0404261	-0.0105622	0.0319382	-0.0286195	0.00557845	-0.0236909	-0.00488095	-0.00451844	0.00135632	0.0228575	-0.00942626	-0.0150234	0.00494493	-0.00502928	-0.0160691	0.000188383	0.0158674	-0.0176072	0.00839609	0.00850746	0.00432582	-0.00578805	-0.00762556	0.00212033	0.00880534	-0.000988682	-0.00225047	-0.00172743	0.00111638	-0.00898884	0.000656844	-0.0106971	0.00544125	0.009719	-0.00143327	-0.0036688	-0.00078201	-0.0075964	0.00484163	-0.00314839	-0.00378776	0.00292879	-0.00156765	0.0032405	-0.00520607	-0.00233591	0.00212358
mBpmk36	Scottish and Irish	-0.0159586	0.000188396	0.0106165	0.000452611	0.0139516	0.0162026	-0.00723537	0.00110854	-0.0128754	0.000718223	-0.0119927	0.0236894	-0.0200836	-0.0132854	0.0017345	-0.00982411	-0.00838178	-0.000937827	-0.00938887	-0.00121346	-0.00342529	-0.00800859	-0.0119812	-0.0126241	0.00696436	0.0058132	-0.000764422	0.00124777	0.00232467	0.00796587	0.00846381	-0.00830561	-0.0024738	0.0031812	0.0102128	-0.000181157	-0.00317833	-0.000834171	0.00430521	0.000837171	-0.00082981	-0.00268592	0.00258898	-0.00414279	-0.000128731	-0.00510647	3.53273e-05	0.00126414
mBpmk37	Scottish and Irish	0.00491788	-0.0191272	-0.0224445	0.00652271	-0.0363856	-0.00573158	0.000572331	0.00524617	0.00821031	-0.0122694	0.0233179	0.00109554	-0.00534942	-0.00218151	0.000687397	0.00169402	-0.000948807	-0.00514484	-0.00807269	0.00116603	-0.00430711	0.000204161	0.0056333	-0.00665922	0.000687767	-0.000878779	-0.00974401	1.13057e-05	-0.00136503	0.0109335	-0.0135743	0.00522313	-0.00878613	0.00441427	-0.00488178	0.000172243	-0.00404954	0.00149081	-0.00641772	-0.00237453	-0.000222994	-0.00020101	-0.00283191	-0.000632163	0.00326957	0.000920507	0.00575641	-0.00151125
mBpmk85	Scottish and Irish	0.00796744	-0.000551502	0.0264262	0.015691	0.0402846	-0.0317417	0.0179181	-0.0178028	-0.00341983	-0.0155875	-0.00592062	-0.0206161	-0.00195862	0.00389832	0.00456335	-0.000276311	0.0015958	0.00861308	-0.00972725	-0.00478528	0.00823871	-0.000828336	0.00741718	0.0091611	-0.0100619	0.00195845	-0.00716307	-0.0104062	0.00228918	0.00449455	2.31169e-05	0.00172519	-0.00282674	-0.0051917	-0.00446997	-0.0106896	-0.00207355	0.00198516	-0.000753096	-0.0040456	-0.00477834	-0.000900045	-0.00424725	0.00340338	0.00238766	-0.00257207	-0.00135152	0.000421841
mBpmk90	Scottish and Irish	-0.0147564	-0.0366027	-0.0333815	-0.0147339	-0.00622692	-0.0334142	-0.0115498	0.00607593	0.0274148	0.00243723	0.0343217	0.00650643	-0.00256105	0.00598405	-0.000576321	0.00841927	-0.00315166	-0.0110005	-0.0168829	0.0018563	0.00382854	-0.010386	0.00283201	0.000881589	-7.49081e-05	0.001596	-0.00464152	-0.00152496	0.00336566	0.00502995	0.00423943	0.00557931	0.00260118	-0.00284352	-0.00223642	0.00195938	-0.00209995	0.00298586	-0.00186878	-0.00626295	0.00363893	-0.0010987	0.000706548	0.00178519	-0.00190965	6.852e-05	0.00246128	0.00220985
mBpmk91	Scottish and Irish	-0.00570381	-0.00753019	-0.0293219	-0.00733227	-0.0184977	-0.0187614	0.00115689	0.0190136	0.0139803	-0.0103881	-0.00359892	0.013611	0.0010479	0.00013115	0.00239806	-0.0134997	0.0043605	0.00429764	-0.00593433	0.00377524	-0.00503048	-0.000122791	0.000103857	0.00142394	-0.00576554	0.00482669	0.0119991	-0.0100357	-0.00501417	-0.00088103	-0.00293891	0.00134053	-0.00115263	0.00570376	-0.00350462	-0.00245993	-0.00299381	0.00166267	0.00302091	-0.00682138	-0.00599496	-0.00762347	-0.00306029	-0.0044111	0.00400609	0.00598141	-0.00452542	-0.00160572
mBpmk112	Scottish and Irish	0.0547554	-0.0151813	-0.0391648	0.0257659	-0.005698	0.00912087	0.0221782	-0.00719123	-0.00387578	-0.0095055	-0.00196642	0.00235176	0.00875778	0.0124247	-0.00468557	0.0062589	-0.0088381	0.0177992	-0.00630201	-0.0118494	0.00461882	-0.00466894	-0.00743482	-0.017889	0.000491469	-0.000407738	-0.00551331	-0.0147662	0.00864893	0.0108811	0.00401216	-0.000518981	-0.00197076	-0.00112467	0.00353024	0.00595142	0.00242266	0.00618285	-0.000251627	0.000315957	0.00142356	0.00231198	0.000541714	6.33291e-05	0.00289583	0.00290803	0.00200426	0.000199876
mBpmk113	Scottish and Irish	-0.00890453	-0.00534022	0.0282268	-0.0131302	-0.0333042	-0.0130328	0.0163704	-0.00666359	0.00328232	0.00408995	0.000539828	-0.00267753	-0.00936699	-0.00638325	0.00452226	0.00508493	-0.00799705	-0.000124916	-0.00403059	-0.000188883	-0.00757997	0.000568763	-0.00233631	-0.00750079	0.00361507	-0.0157721	0.00539597	-0.00161054	-0.0098752	0.00611178	0.00119299	-0.00626688	-0.00228684	-0.0085901	0.00182907	-0.00112424	-0.00694622	-0.00392374	-0.0013139	-0.00364571	0.0045191	-0.0116545	-0.00129858	0.00190252	0.00705418	-0.000927539	-0.00377802	0.0027214
mBpmk128	Scottish and Irish	-0.0227462	-0.0149847	0.00833641	0.0296865	-0.0248394	0.0181513	-0.0156137	-0.0015924	0.00930871	-0.000763416	-0.010274	-0.0282088	-0.00558505	0.00359628	-0.00552797	-0.002465	-0.0232787	0.00744719	0.0187328	-0.000741198	-0.00783457	-0.00234077	0.000395051	0.00720379	-0.00241807	-0.00455397	-0.00312476	-0.000799042	0.00951598	-0.00497035	0.00323245	0.0130052	0.0086057	0.00588494	0.0146963	0.00221977	-0.00581362	-0.00505158	-0.00519073	0.00171235	-0.00368384	0.000256952	-0.00163691	0.00785498	-0.000848831	0.00221631	-0.00303009	0.00593701
mBpmk147	Scottish and Irish	0.0243937	0.00415079	0.00179765	0.0499145	-0.00582824	0.00969064	-0.00550505	-0.000227793	-0.00527	-0.0078779	0.000649685	-0.0127971	0.00351701	0.0111604	0.0139115	-0.0106364	-0.0142913	-0.00784371	-0.00855376	-0.00614307	-0.00441926	0.00722771	0.00713515	0.0160399	0.000912042	-0.00358466	-0.00247547	0.00164837	-0.00729094	0.000943871	0.00183936	0.00670338	-0.00264378	0.00878052	0.00285714	-0.000738185	0.00355683	-0.00191535	0.00455447	0.00409251	-0.0016246	-0.00206443	0.000507283	-0.000629739	0.00491481	-0.000355641	-0.0010621	0.00173587
mBpmk148	Scottish and Irish	0.0173826	0.00512971	-0.00346013	0.0364684	0.0111732	0.0178835	-0.0228723	0.0126852	0.000323767	0.00595553	0.0111101	0.0146074	0.00738442	0.00607544	0.00525798	-0.00698549	-0.0186691	-0.00279191	0.00802585	0.000569978	-0.00225557	0.00359956	-0.00652001	0.00324123	-0.00585652	-0.0141036	-0.0105814	-0.000425397	0.00227144	0.013449	-0.00976772	-0.00346975	0.00804717	-0.00116778	-0.00526936	-0.000414017	-0.00715378	0.00531489	-0.00328519	-0.00214126	0.00243065	0.000367805	-0.00412124	0.00104212	0.000937298	0.00554828	-0.00494605	-0.00510951
mBSbrBet5	Scottish and Irish	-0.00243346	0.0148897	-0.0556589	-0.0101304	-0.0169591	-0.010454	0.033324	0.0132095	0.00466686	0.0189216	0.0227971	0.0255749	-0.0352501	0.00138827	0.00148061	0.00371964	-0.0190123	0.00512104	0.00330251	0.00908636	-0.00381406	0.00543475	0.00811429	0.00319053	-0.00300963	0.00547755	-0.00484226	0.00289879	0.00566667	0.00988933	-0.00515442	0.00727247	0.00129072	0.00672547	-0.00703661	-0.00372899	0.000926731	-0.00198793	-0.000169868	0.00233592	0.00446007	0.00317805	0.00574062	0.00465815	-0.00292411	-0.0048176	0.00101231	0.00154227
mBSnlHop21	Scottish and Irish	-0.0271422	0.00576478	0.000483951	7.59784e-05	-0.0076151	0.00892436	-0.0045247	0.00677557	0.0187665	-0.00498696	-0.0117382	0.0399541	-0.00805909	0.00966525	-0.0108295	-0.0237062	0.0116134	-0.00161148	0.00486667	-0.0209617	0.00389238	0.0108449	0.0047347	-0.0094737	-0.00572544	0.00192387	-0.00598053	-0.00150796	-0.0101162	0.0118527	0.0036657	0.0157704	-0.00253329	0.00174322	-0.00710745	-0.00761247	0.00498082	0.00250923	-0.00124329	-0.00358896	0.00264927	0.00380092	-0.00101497	-0.00305246	0.0020777	-4.84987e-05	-0.000632197	0.000563599
mBSnlKoY	Scottish and Irish	0.030128	-0.0814559	0.0274658	0.0275507	0.0169766	0.00301325	-0.00556106	-0.00631963	0.013664	-0.00390738	0.00667925	0.0211968	-0.0113282	-0.0172902	0.0111596	0.016929	0.00574752	0.0180329	-0.00147218	-0.0148457	0.00621554	0.00572086	0.00335633	0.0188234	-0.0135749	-0.00117919	0.00400983	-0.00445722	-0.000946491	0.00112313	-0.00598506	0.00691747	-0.000513057	0.000341221	0.00729545	0.00186436	0.000545222	-0.00165172	0.00119203	0.00458243	0.0043785	0.00190418	0.00527176	-0.00158537	0.0027805	-0.00243193	-0.000989024	-0.00466329
mBSbrLb	Scottish and Irish	0.0598614	-0.0391832	-0.032844	-0.0518526	0.0121099	0.00377016	-0.00320572	0.00864072	0.0131593	0.0111051	-0.0184163	-0.00733605	-0.0224641	-0.000631996	0.00103423	-0.00290315	-0.00449356	-0.00262045	0.00107787	0.011353	-0.00231823	-0.00121933	0.0130491	-0.00787156	0.00170622	0.00599368	-0.000195131	0.00367974	0.0110463	0.00666329	0.00780031	-0.0032435	0.00199968	-0.000858479	0.0025503	0.00482067	0.00582989	-0.00873899	-0.00580987	0.00455764	-0.00175437	-0.000566388	0.0027882	-0.000333435	0.00654798	0.00051556	0.000736067	-0.00279115
mBSnlsb252	Scottish and Irish	0.0049376	0.0288127	0.0202144	-0.0202455	0.00301997	-0.0196427	-0.0384125	-0.00123034	0.00815484	-0.0160298	-0.00215268	-0.00529629	-0.00504095	0.0107469	0.00293456	0.00372262	-0.000137439	0.0118091	0.00672341	-0.0021846	0.00278135	0.00174804	0.00624859	-0.00171371	-0.00224874	0.00451206	-0.00200142	-0.00146228	0.00168501	-0.00418312	-0.012501	-0.00598316	0.00471253	0.000575778	0.00189624	-0.000472501	-0.000174313	-0.000441381	0.00145014	-0.00435979	0.00319295	0.00375448	0.00681262	0.00166394	0.00133227	-0.00386193	0.00376966	0.00242838
mBmdcFln959	Scottish and Irish	-0.0120274	0.0296326	-0.0139212	0.0146946	-0.0175751	-0.0200417	0.0115996	-0.0105883	0.000941939	-0.00698555	-0.00839908	-0.0127406	-0.00658288	0.00532231	-0.00851213	0.00522479	-0.00451864	-0.00354194	-0.00379228	0.00366646	0.00176141	0.00588472	0.00444848	0.00526741	0.00543224	-0.00706791	0.00129618	-0.00225297	-0.000419281	-0.00837563	0.00111931	-0.00362529	0.00357152	0.00585687	0.00277555	0.00184603	0.000205731	-0.0071512	0.000400586	-0.0048127	0.00405604	0.00464348	0.00382183	-0.00380879	0.00154288	-0.00202483	-0.0035935	-0.00188024
